# Supplementary material
Source: MDPI journal article supplement (https://www.mdpi.com/2073-4344/13/10/1330)

## Supporting Information

Copies of all NMR spectra

S2-S33

|                        |                                                   |                       |                      |  |                        |                      |  |
|------------------------|---------------------------------------------------|-----------------------|----------------------|--|------------------------|----------------------|--|
| Acquisition Time (sec) | 4.0894                                            | Comment               | Imported from UXNMR. |  | Date                   | 18 Mar 2023 13:45:40 |  |
| File Name              | C:\DOCS\OUTPUT_301\2023\03\1\äð\BM-2761.H_001001r | Frequency (MHz)       | 400.13               |  | Nucleus                | 1H                   |  |
| Number of Transients   | 4                                                 | Original Points Count | 32768                |  | Pulse Sequence         | zg30                 |  |
| Solvent                | CHLOROFORM-D                                      | Sweep Width (Hz)      | 8012.82              |  | Temperature (degree C) | 27.000               |  |

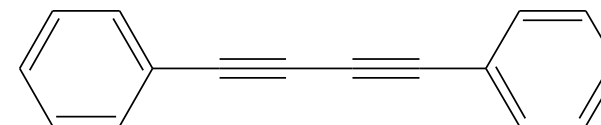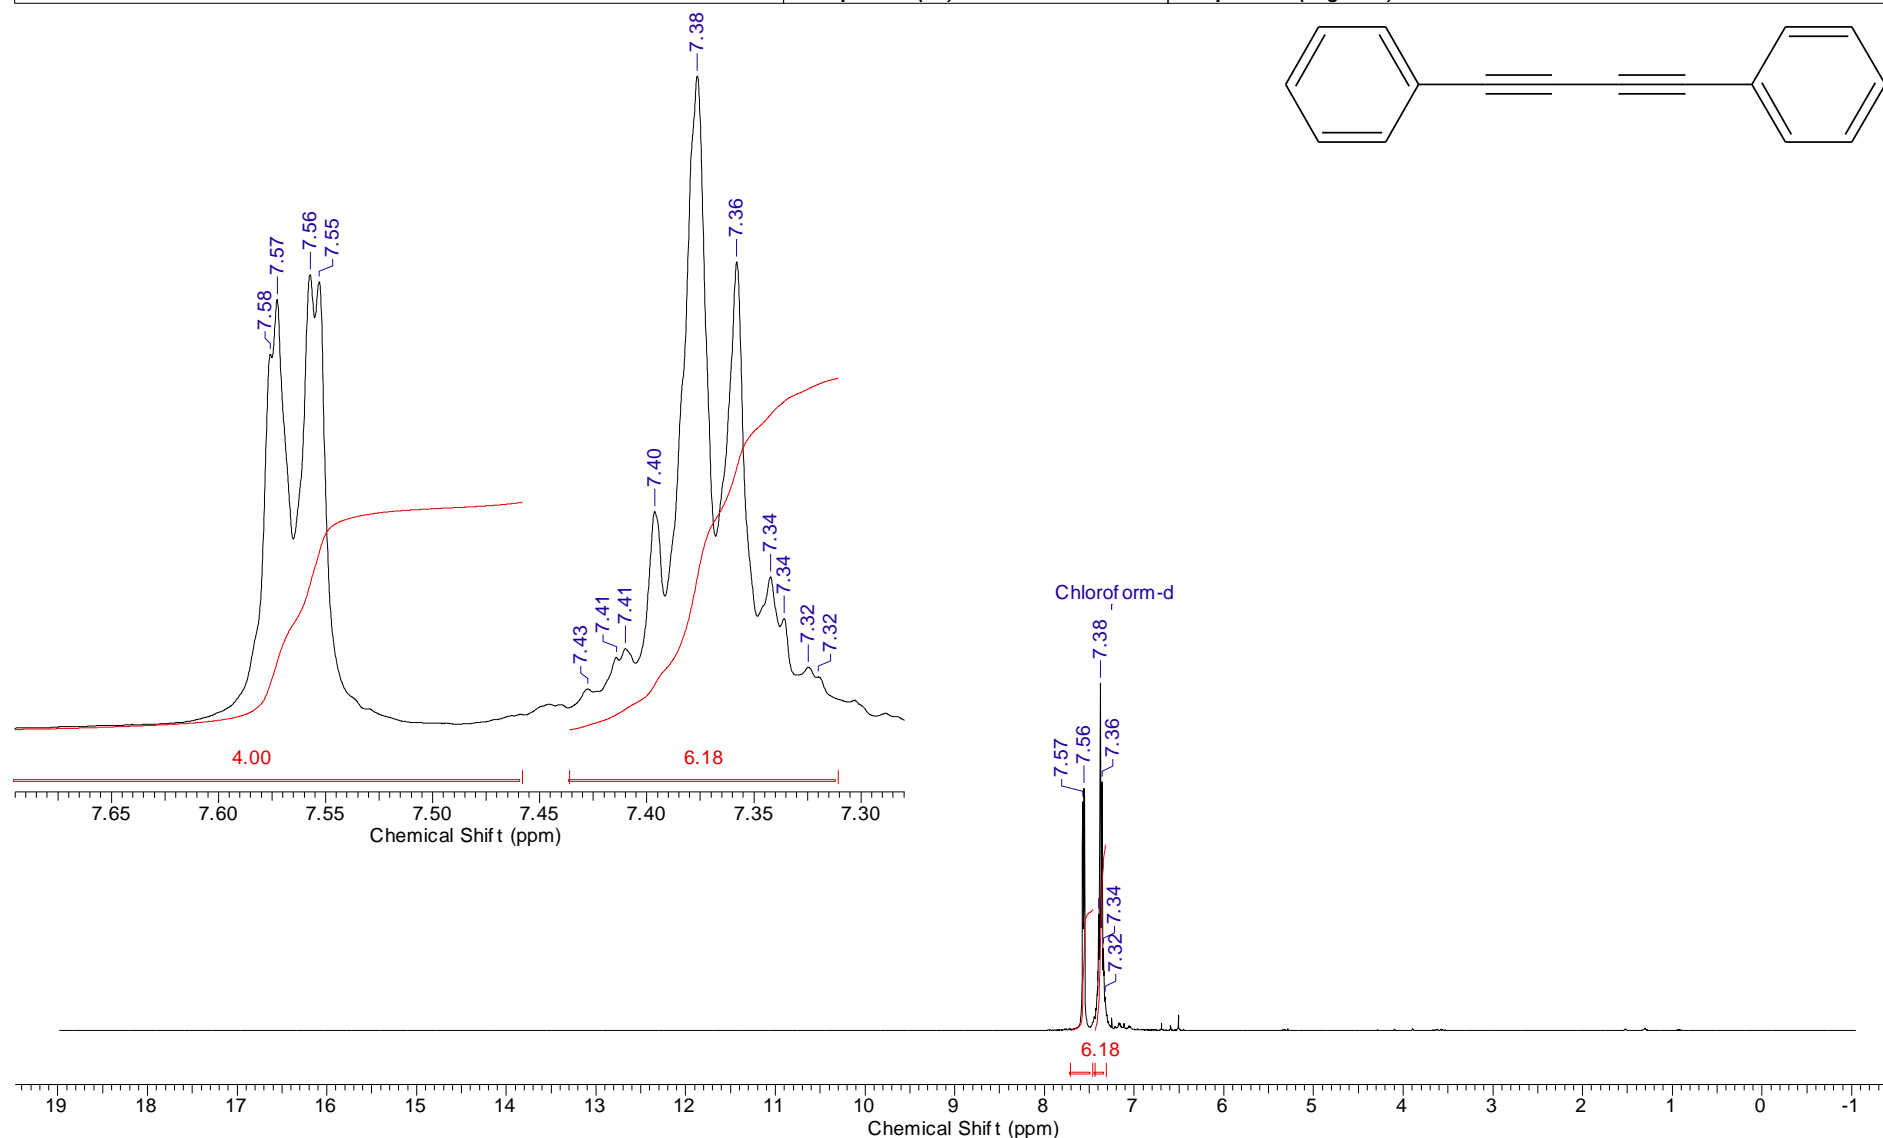

<sup>1</sup>H NMR spectrum of **2a** (400.1 MHz, CDCl<sub>3</sub>)

|                               |                                              |                              |                      |  |                               |                      |  |
|-------------------------------|----------------------------------------------|------------------------------|----------------------|--|-------------------------------|----------------------|--|
| <b>Acquisition Time (sec)</b> | 0.6783                                       | <b>Comment</b>               | Imported from UxNMR. |  | <b>Date</b>                   | 18 Mar 2023 13:48:50 |  |
| <b>File Name</b>              | C:\DOCS\OUTPUT_301\2023\03\BM-2761.C_002001r | <b>Frequency (MHz)</b>       | 100.61               |  | <b>Nucleus</b>                | 13C                  |  |
| <b>Number of Transients</b>   | 36                                           | <b>Original Points Count</b> | 16384                |  | <b>Pulse Sequence</b>         | zgpg30               |  |
| <b>Solvent</b>                | CHLOROFORM-D                                 | <b>Sweep Width (Hz)</b>      | 24154.59             |  | <b>Temperature (degree C)</b> | 27.000               |  |

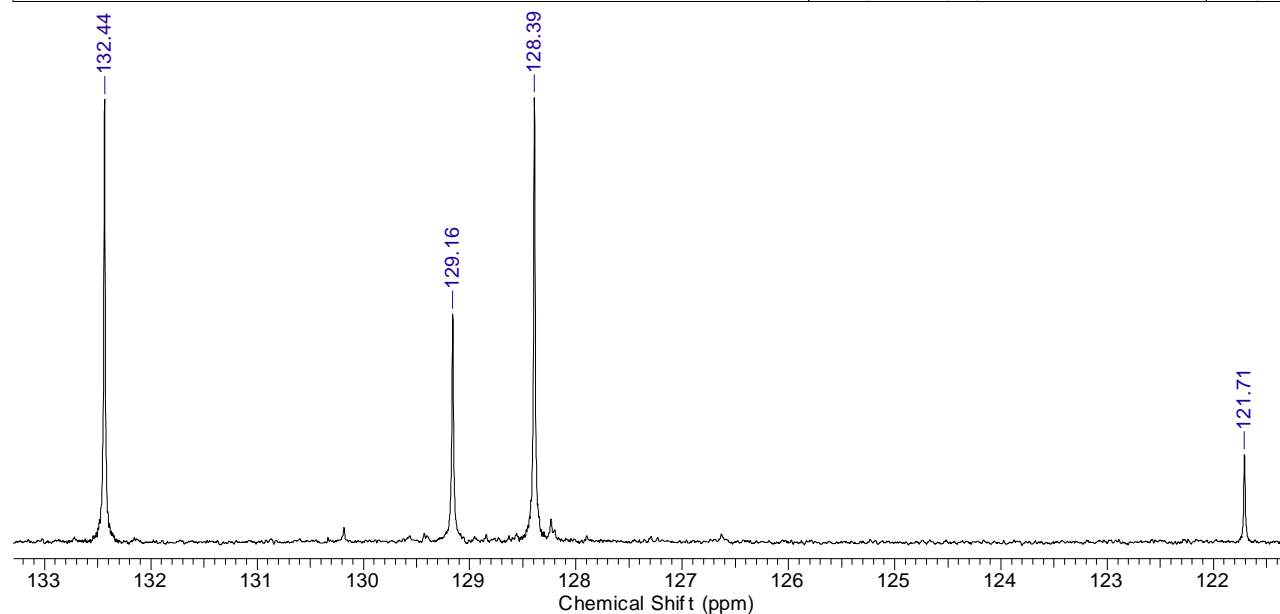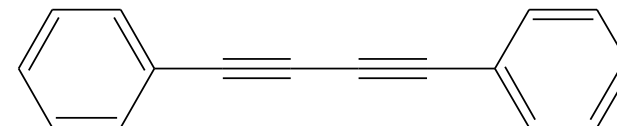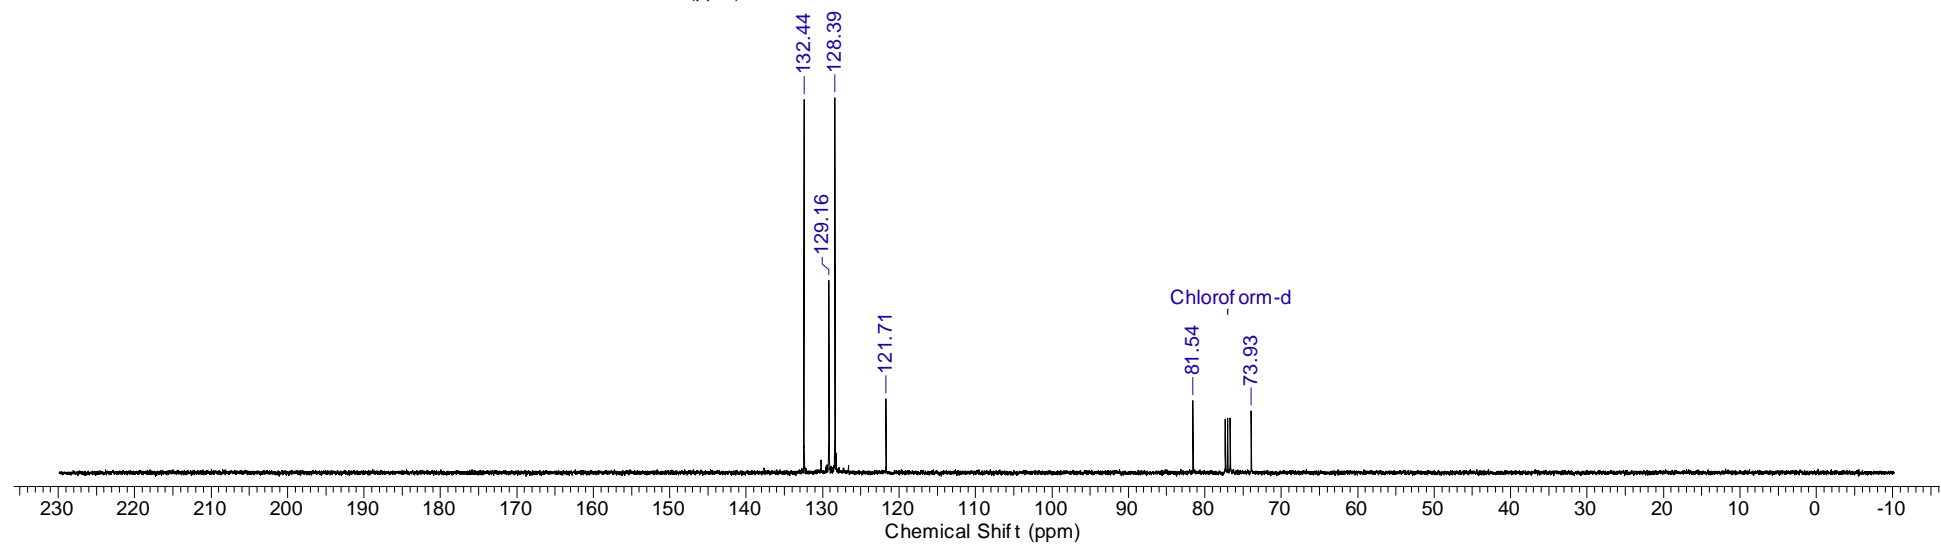

<sup>13</sup>C NMR spectrum of **2a** (100.6 MHz, CDCl<sub>3</sub>)

|                        |                                                       |                      |                      |                       |                  |                      |        |
|------------------------|-------------------------------------------------------|----------------------|----------------------|-----------------------|------------------|----------------------|--------|
| Acquisition Time (sec) | 4.0894                                                | Comment              | Imported from UXNMR. |                       | Date             | 11 Apr 2023 12:26:56 |        |
| File Name              | C:\DOCS\OUTPUT_301\2023\04.äi ääü\BM-2777-n.H_001001r |                      |                      |                       | Frequency (MHz)  | 400.13               |        |
| Nucleus                | 1H                                                    | Number of Transients | 4                    | Original Points Count | 32768            | Points Count         | 131072 |
| Pulse Sequence         | zg30                                                  | Solvent              | CHLOROFORM-D         |                       | Sweep Width (Hz) | 8012.82              |        |
| Temperature (degree C) | 27.000                                                |                      |                      |                       |                  |                      |        |

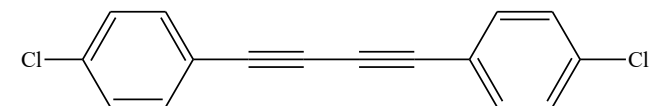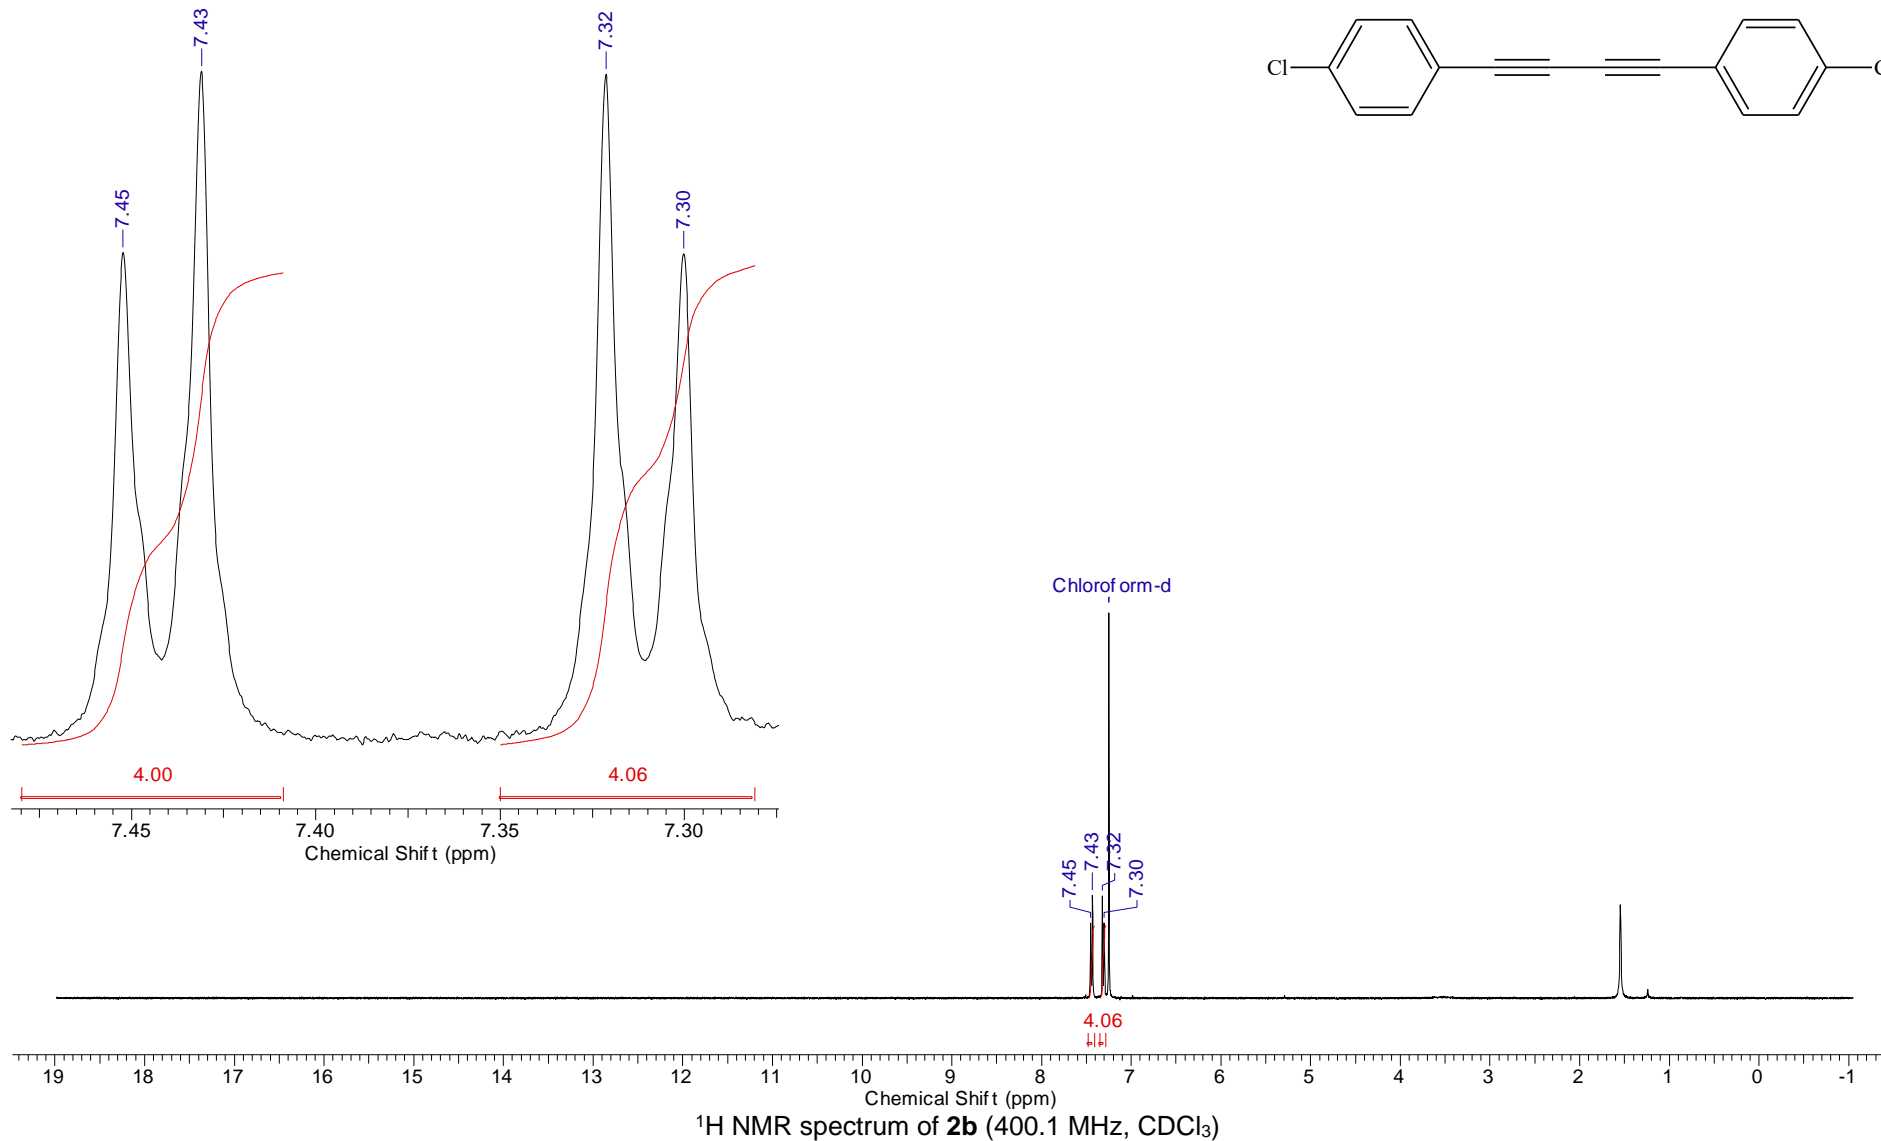

|                        |                                                       |                      |                      |                       |       |                  |                      |
|------------------------|-------------------------------------------------------|----------------------|----------------------|-----------------------|-------|------------------|----------------------|
| Acquisition Time (sec) | 4.0894                                                | Comment              | Imported from UXNMR. |                       |       | Date             | 11 Apr 2023 12:16:20 |
| File Name              | C:\DOCS\OUTPUT_301\2023\04.äi ääü\BM-2778-d.H_001001r |                      |                      |                       |       | Frequency (MHz)  | 400.13               |
| Nucleus                | 1H                                                    | Number of Transients | 4                    | Original Points Count | 32768 | Points Count     | 131072               |
| Pulse Sequence         | zg30                                                  | Solvent              | CHLOROFORM-D         |                       |       | Sweep Width (Hz) | 8012.82              |
| Temperature (degree C) | 27.000                                                |                      |                      |                       |       |                  |                      |

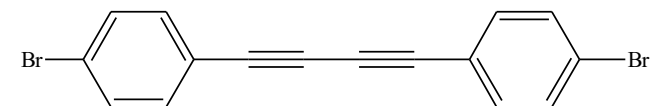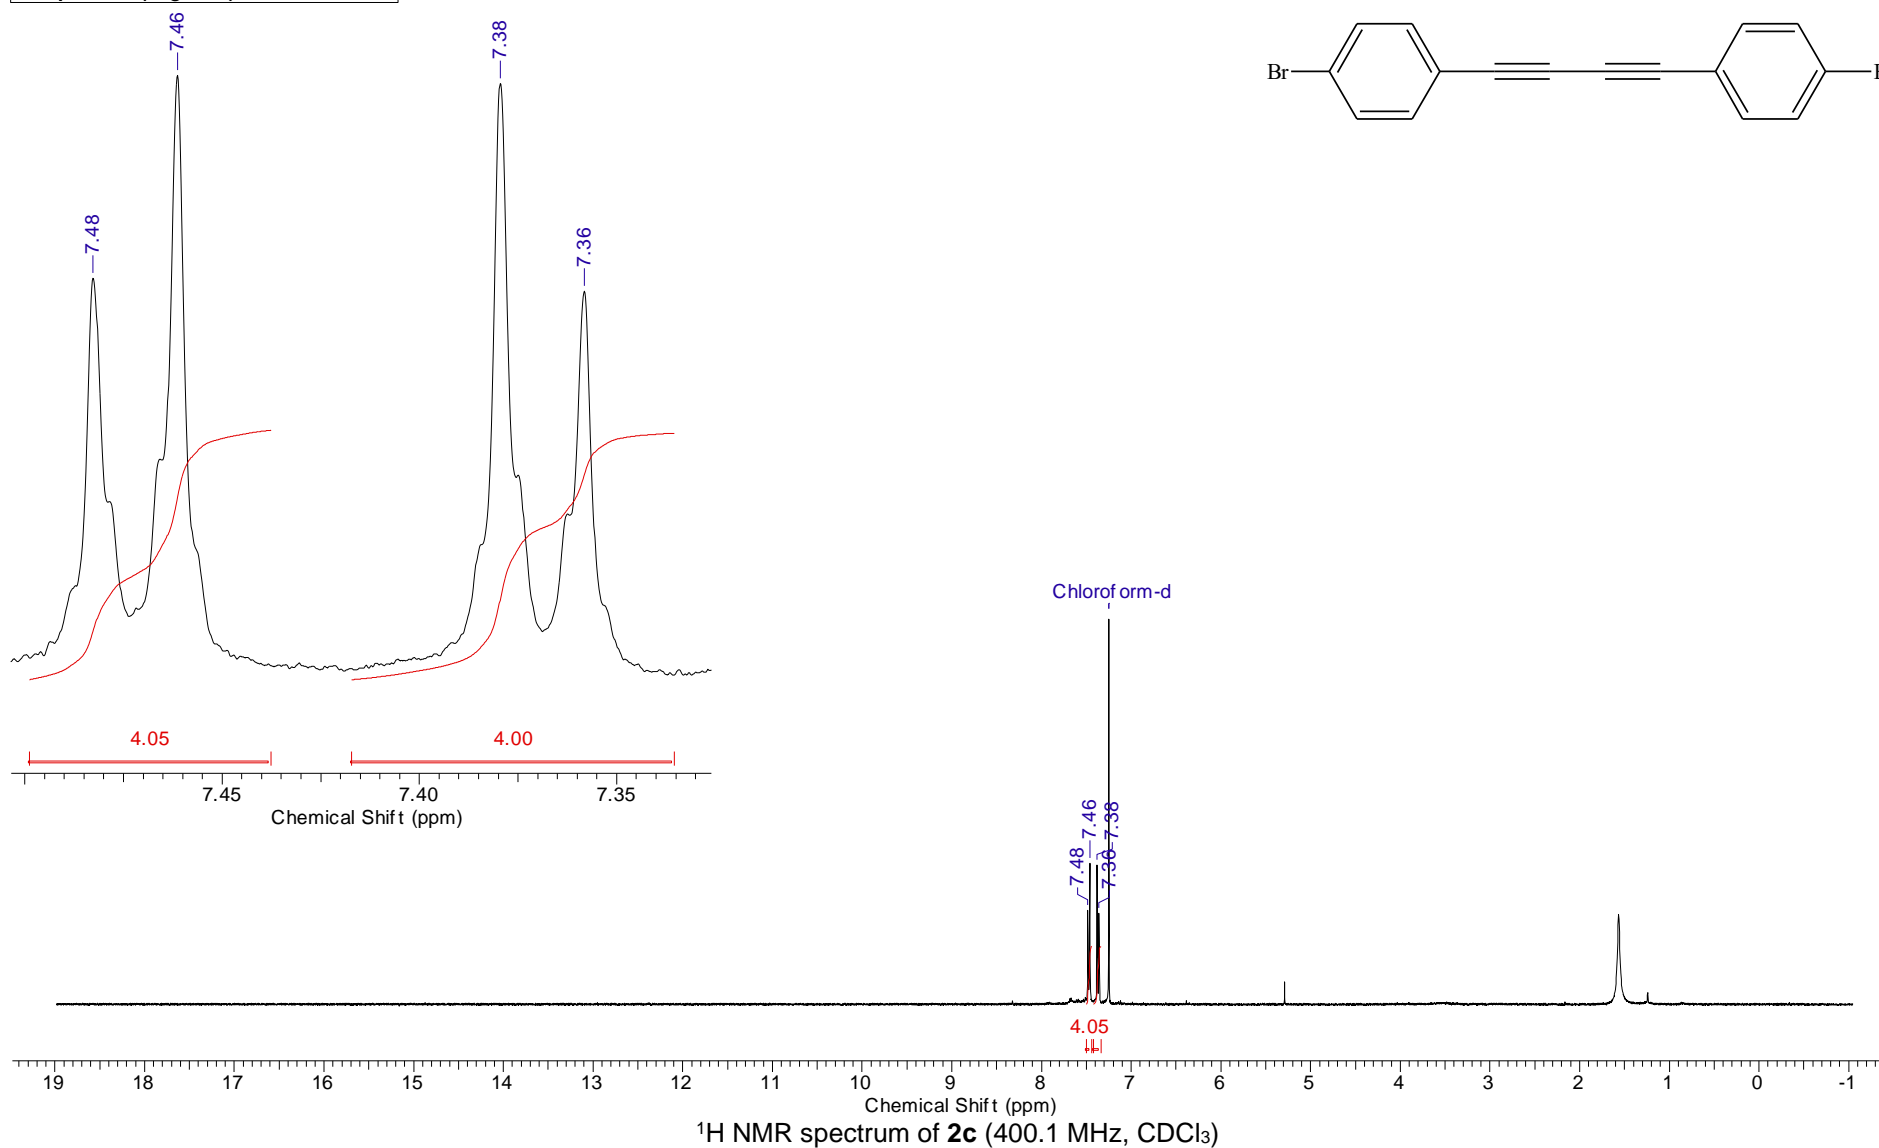

|                        |                                                       |                      |                      |                       |                  |                      |        |
|------------------------|-------------------------------------------------------|----------------------|----------------------|-----------------------|------------------|----------------------|--------|
| Acquisition Time (sec) | 4.0894                                                | Comment              | Imported from Uxnmr. |                       | Date             | 10 Apr 2023 14:27:42 |        |
| File Name              | C:\DOCS\OUTPUT_301\2023\04.äi ääü\BM-2779-2.H_001001r |                      |                      |                       | Frequency (MHz)  | 400.13               |        |
| Nucleus                | 1H                                                    | Number of Transients | 4                    | Original Points Count | 32768            | Points Count         | 131072 |
| Pulse Sequence         | zg30                                                  | Solvent              | CHLOROFORM-D         |                       | Sweep Width (Hz) | 8012.82              |        |
| Temperature (degree C) | 27.000                                                |                      |                      |                       |                  |                      |        |

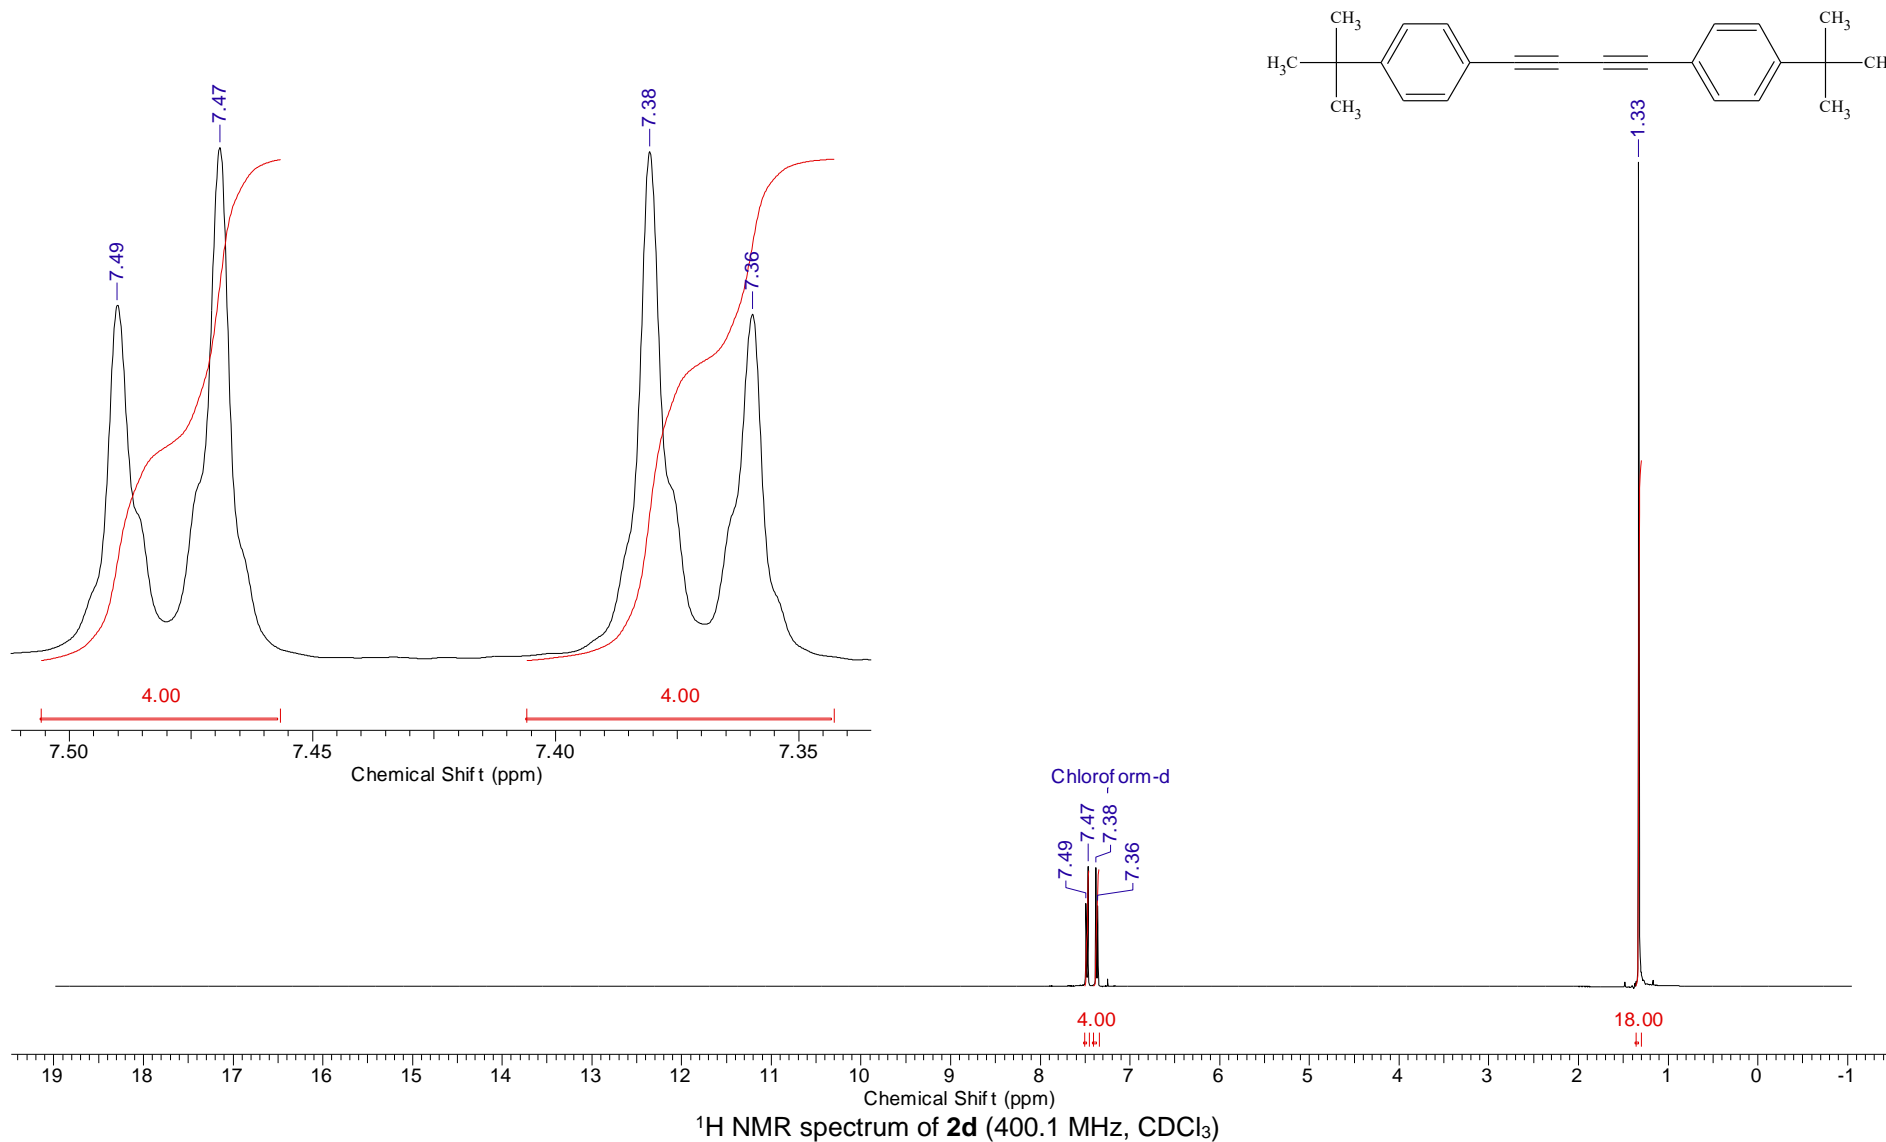

|                        |                                                       |                      |                      |                       |                      |
|------------------------|-------------------------------------------------------|----------------------|----------------------|-----------------------|----------------------|
| Acquisition Time (sec) | 0.6783                                                | Comment              | Imported from UXNMR. | Date                  | 10 Apr 2023 14:32:44 |
| File Name              | C:\DOCS\OUTPUT_301\2023\04.äi ääü\BM-2779-2.C_002001r |                      |                      | Frequency (MHz)       | 100.61               |
| Nucleus                | <sup>13</sup> C                                       | Number of Transients | 27                   | Original Points Count | 16384                |
| Pulse Sequence         | zgpg30                                                | Solvent              | DEUTERIUM OXIDE      | Points Count          | 131072               |
| Temperature (degree C) | 27.000                                                |                      |                      | Sweep Width (Hz)      | 24154.59             |

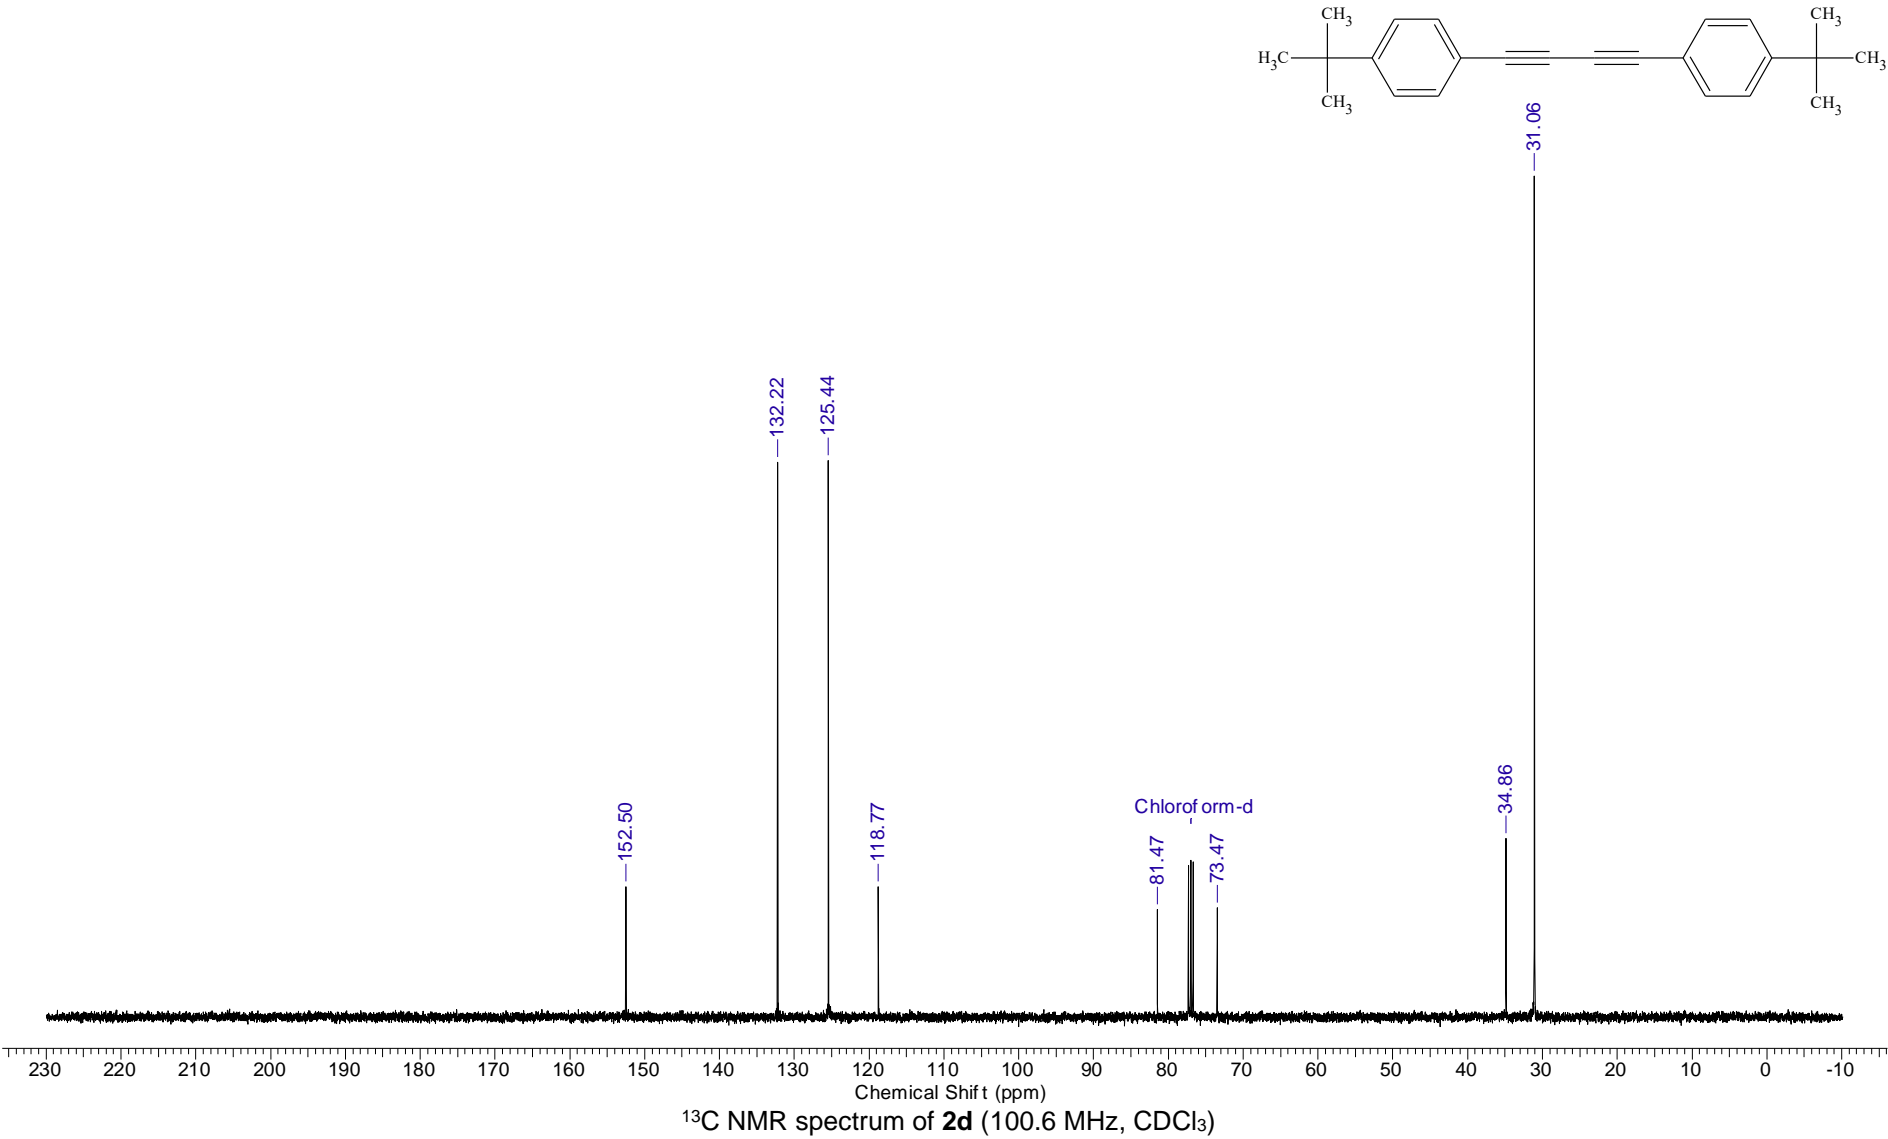

|                               |                                                        |                             |                      |                              |                         |                      |        |
|-------------------------------|--------------------------------------------------------|-----------------------------|----------------------|------------------------------|-------------------------|----------------------|--------|
| <b>Acquisition Time (sec)</b> | 4.0894                                                 | <b>Comment</b>              | Imported from UXNMR. |                              | <b>Date</b>             | 07 Apr 2023 15:46:14 |        |
| <b>File Name</b>              | C:\DOCS\OUTPUT_301\2023\04.äi ääëü\BM-2776-3.H_001001r |                             |                      |                              | <b>Frequency (MHz)</b>  | 400.13               |        |
| <b>Nucleus</b>                | 1H                                                     | <b>Number of Transients</b> | 4                    | <b>Original Points Count</b> | 32768                   | <b>Points Count</b>  | 131072 |
| <b>Pulse Sequence</b>         | zg30                                                   | <b>Solvent</b>              | CHLOROFORM-D         |                              | <b>Sweep Width (Hz)</b> | 8012.82              |        |
| <b>Temperature (degree C)</b> | 27.000                                                 |                             |                      |                              |                         |                      |        |

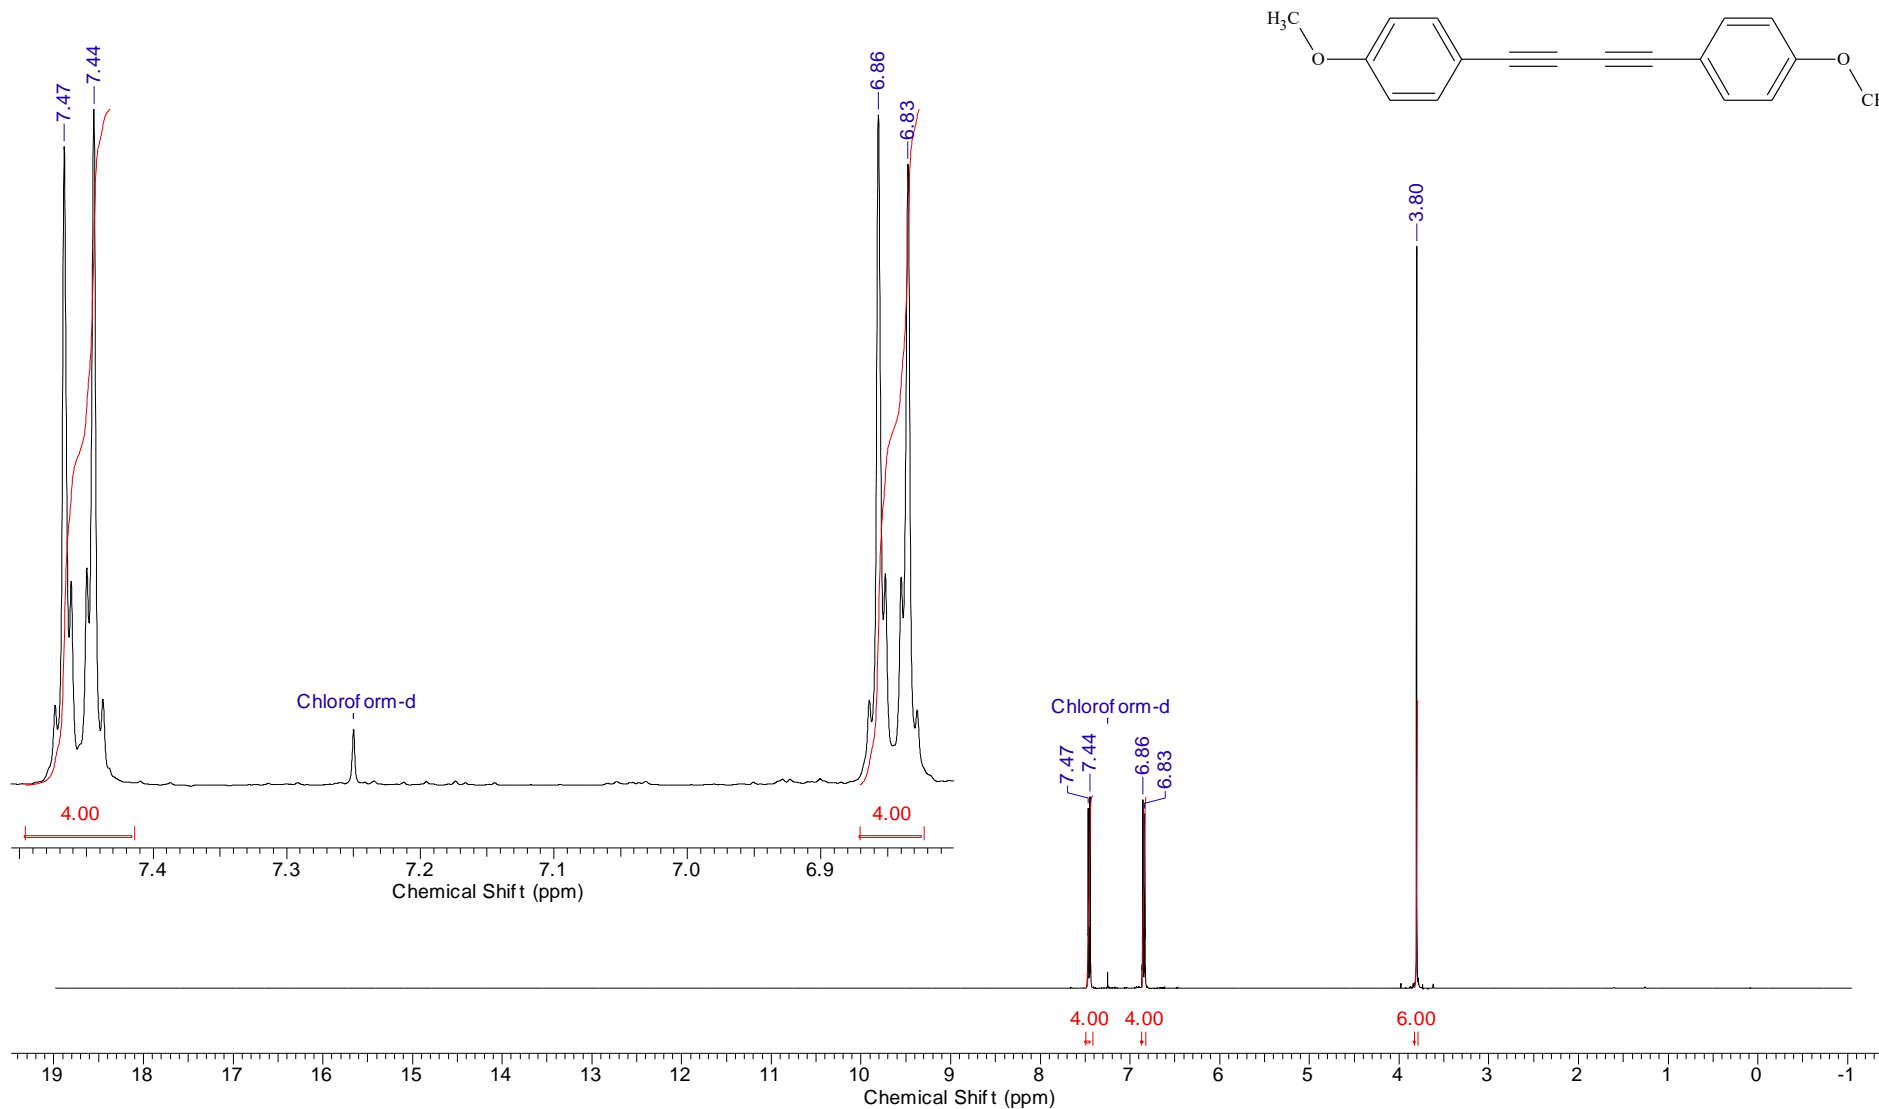<sup>1</sup>H NMR spectrum of 2e (400.1 MHz, CDCl<sub>3</sub>)



|                        |                                                       |                      |                      |                       |                      |
|------------------------|-------------------------------------------------------|----------------------|----------------------|-----------------------|----------------------|
| Acquisition Time (sec) | 0.6783                                                | Comment              | Imported from UXNMR. | Date                  | 07 Apr 2023 15:49:20 |
| File Name              | C:\DOCS\OUTPUT_301\2023\04.äi ääü\BM-2776-3.C_002001r |                      |                      | Frequency (MHz)       | 100.61               |
| Nucleus                | <sup>13</sup> C                                       | Number of Transients | 25                   | Original Points Count | 16384                |
| Pulse Sequence         | zgpg30                                                | Solvent              | DEUTERIUM OXIDE      | Points Count          | 131072               |
| Temperature (degree C) | 27.000                                                |                      |                      | Sweep Width (Hz)      | 24154.59             |

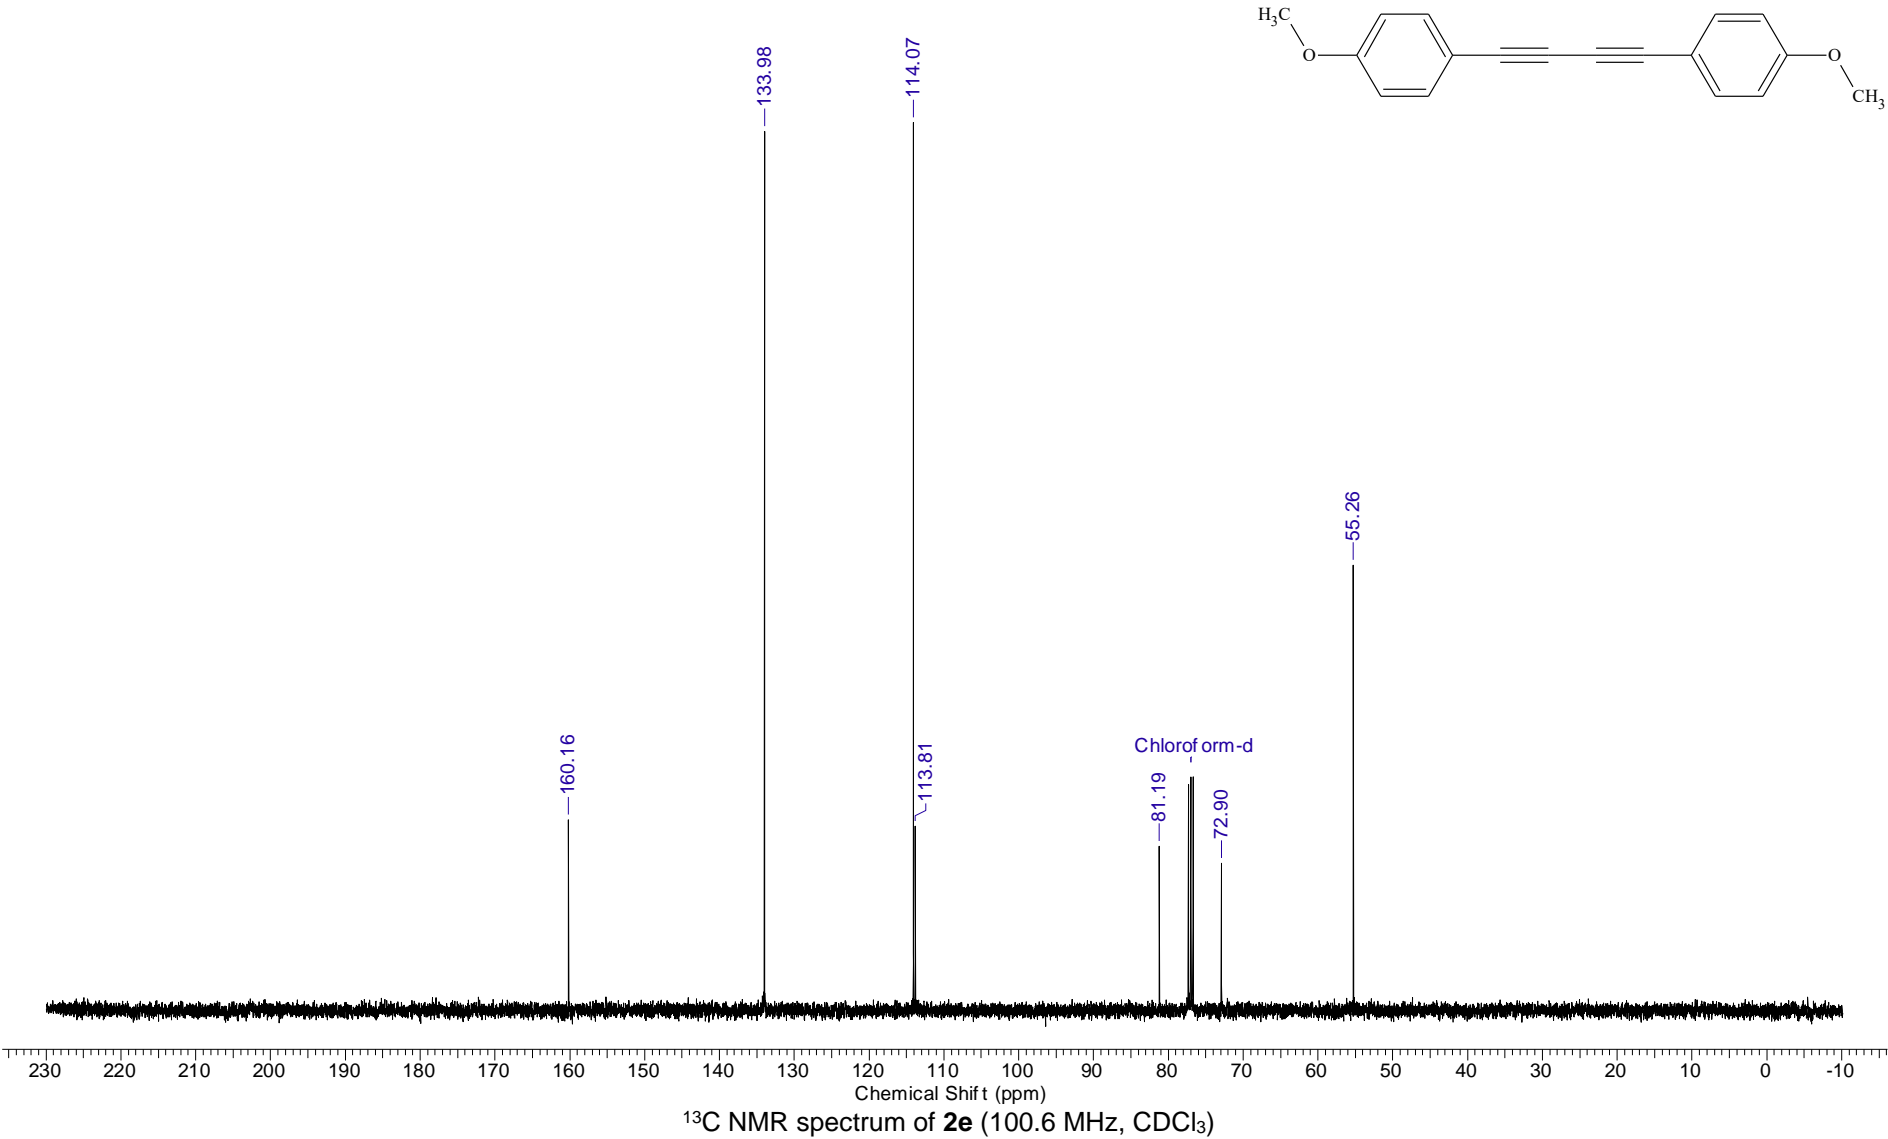

|                        |                                                       |                      |                      |                       |                  |                      |        |
|------------------------|-------------------------------------------------------|----------------------|----------------------|-----------------------|------------------|----------------------|--------|
| Acquisition Time (sec) | 4.0894                                                | Comment              | Imported from UXNMR. |                       | Date             | 03 Apr 2023 14:45:30 |        |
| File Name              | C:\DOCS\OUTPUT_301\2023\04.år ðæü\BM-2774-1.H_001001r |                      |                      |                       | Frequency (MHz)  | 400.13               |        |
| Nucleus                | 1H                                                    | Number of Transients | 4                    | Original Points Count | 32768            | Points Count         | 131072 |
| Pulse Sequence         | zg30                                                  | Solvent              | CHLOROFORM-D         |                       | Sweep Width (Hz) | 8012.82              |        |
| Temperature (degree C) | 27.000                                                |                      |                      |                       |                  |                      |        |

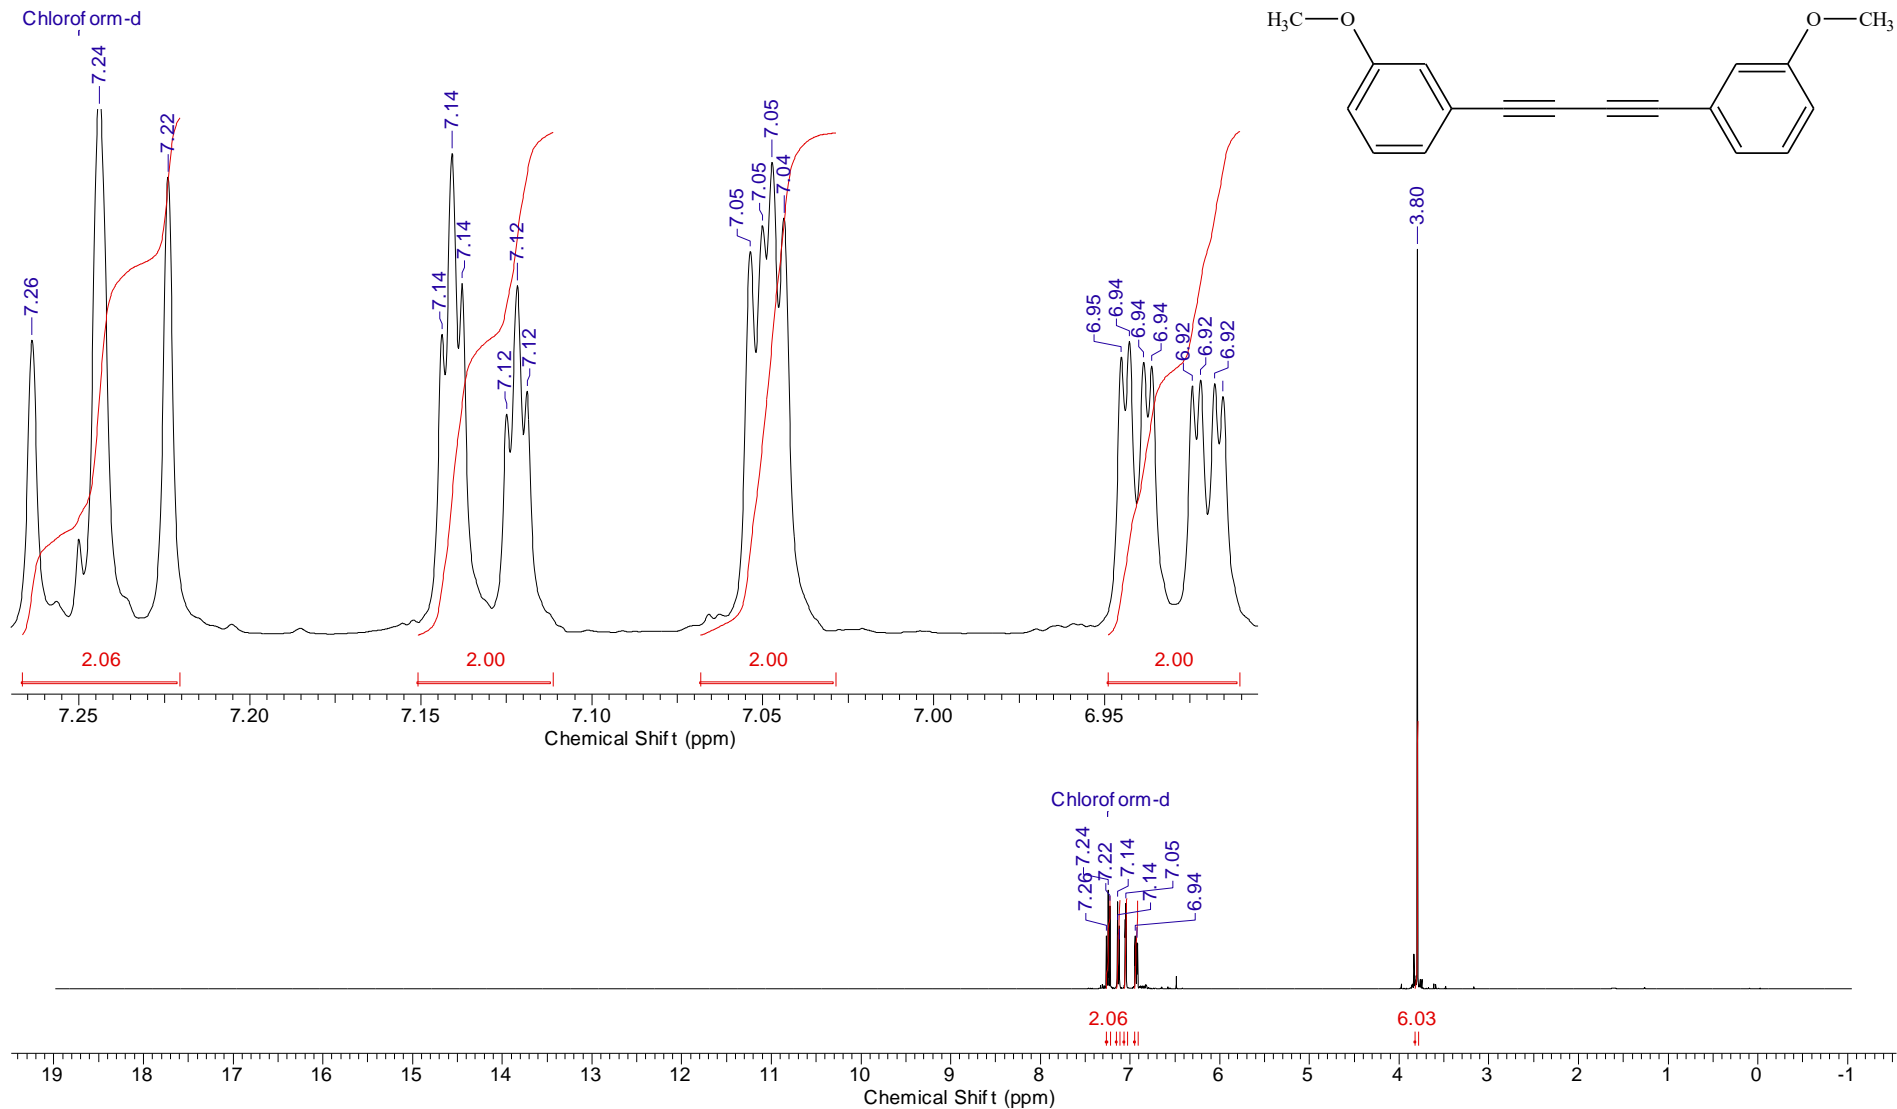<sup>1</sup>H NMR spectrum of **2f** (400.1 MHz, CDCl<sub>3</sub>)

|                        |                                                       |                      |                      |                       |                  |                      |        |
|------------------------|-------------------------------------------------------|----------------------|----------------------|-----------------------|------------------|----------------------|--------|
| Acquisition Time (sec) | 0.6783                                                | Comment              | Imported from UXMNR. |                       | Date             | 03 Apr 2023 15:14:10 |        |
| File Name              | C:\DOCS\OUTPUT_301\2023\04.äi ääü\BM-2774-1.C_002001r |                      |                      |                       | Frequency (MHz)  | 100.61               |        |
| Nucleus                | 13C                                                   | Number of Transients | 34                   | Original Points Count | 16384            | Points Count         | 131072 |
| Pulse Sequence         | zgpg30                                                | Solvent              | CHLOROFORM-D         |                       | Sweep Width (Hz) | 24154.59             |        |
| Temperature (degree C) | 27.000                                                |                      |                      |                       |                  |                      |        |

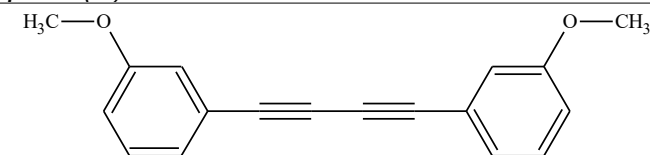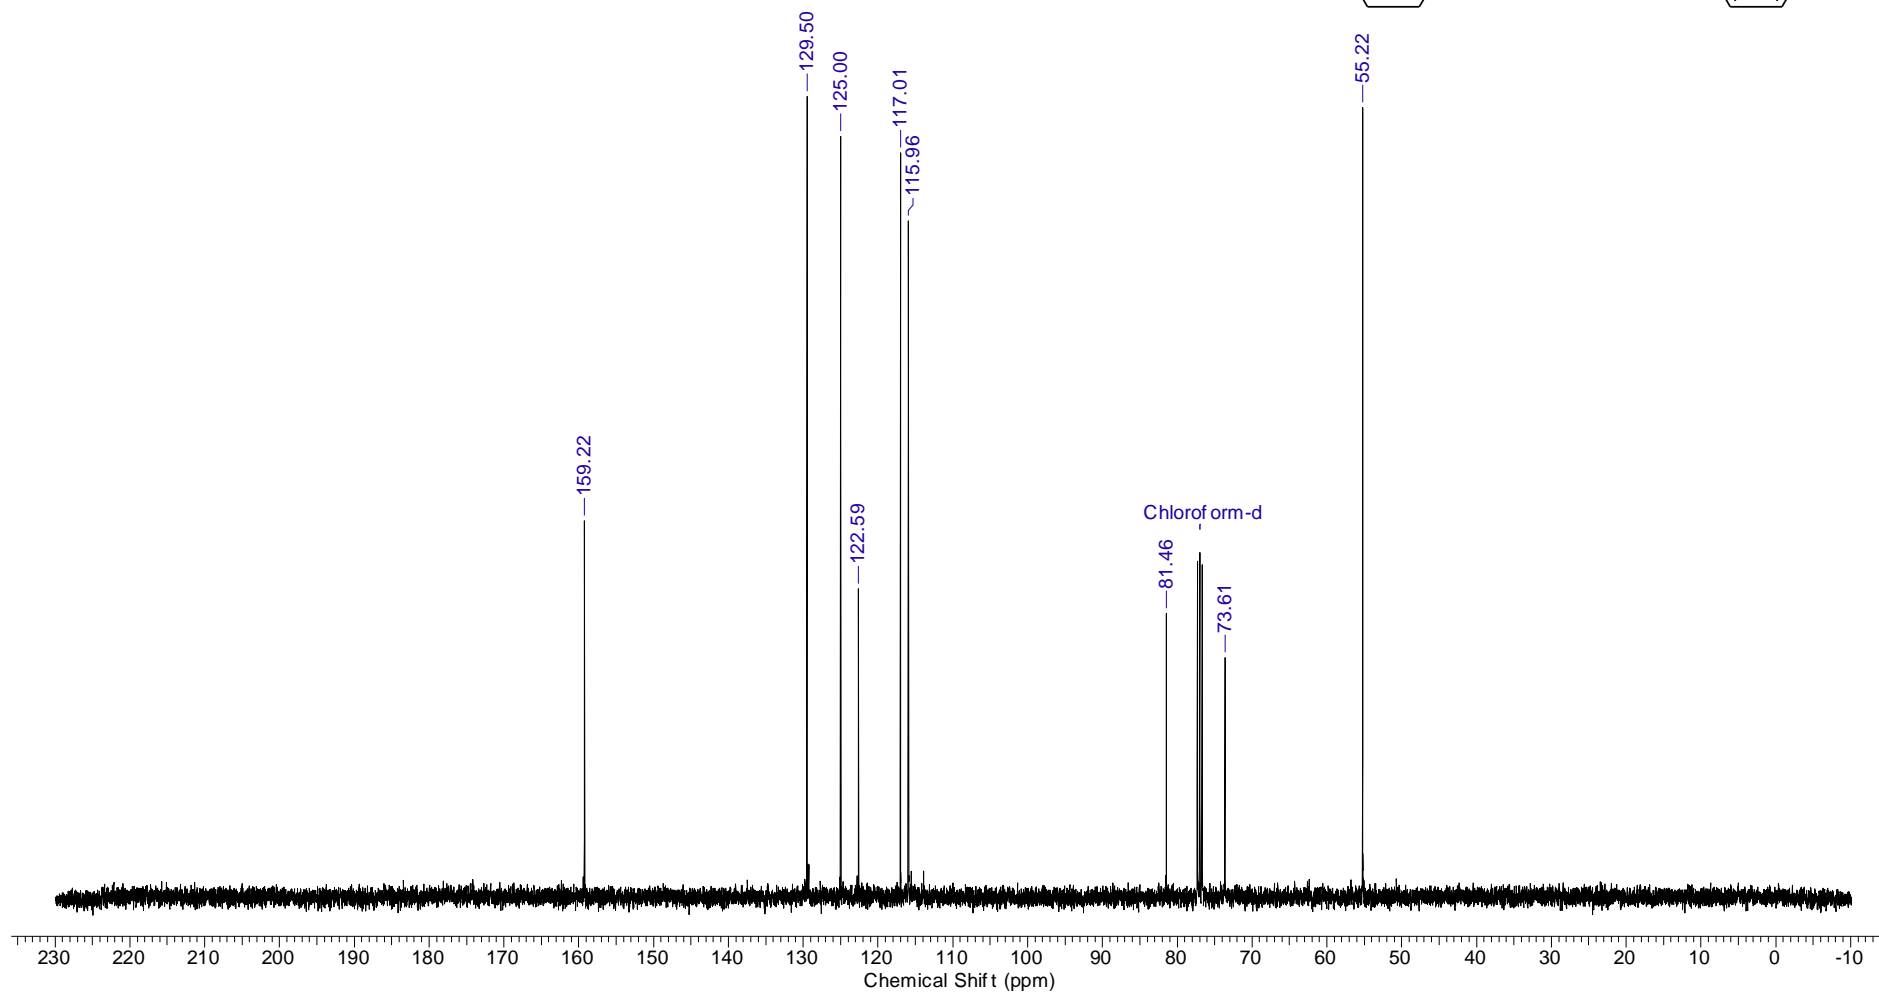

<sup>13</sup>C NMR spectrum of 2f (100.6 MHz, CDCl<sub>3</sub>)

|                        |                                                        |                      |                      |                       |                  |                      |        |
|------------------------|--------------------------------------------------------|----------------------|----------------------|-----------------------|------------------|----------------------|--------|
| Acquisition Time (sec) | 4.0894                                                 | Comment              | Imported from UXNMR. |                       | Date             | 06 Apr 2023 11:59:00 |        |
| File Name              | C:\DOCS\OUTPUT_301\2023\04.äi ääü\BM-2775-Cr.H_001001r |                      |                      |                       | Frequency (MHz)  | 400.13               |        |
| Nucleus                | 1H                                                     | Number of Transients | 4                    | Original Points Count | 32768            | Points Count         | 131072 |
| Pulse Sequence         | zg30                                                   | Solvent              | CHLOROFORM-D         |                       | Sweep Width (Hz) | 8012.82              |        |
| Temperature (degree C) | 27.000                                                 |                      |                      |                       |                  |                      |        |

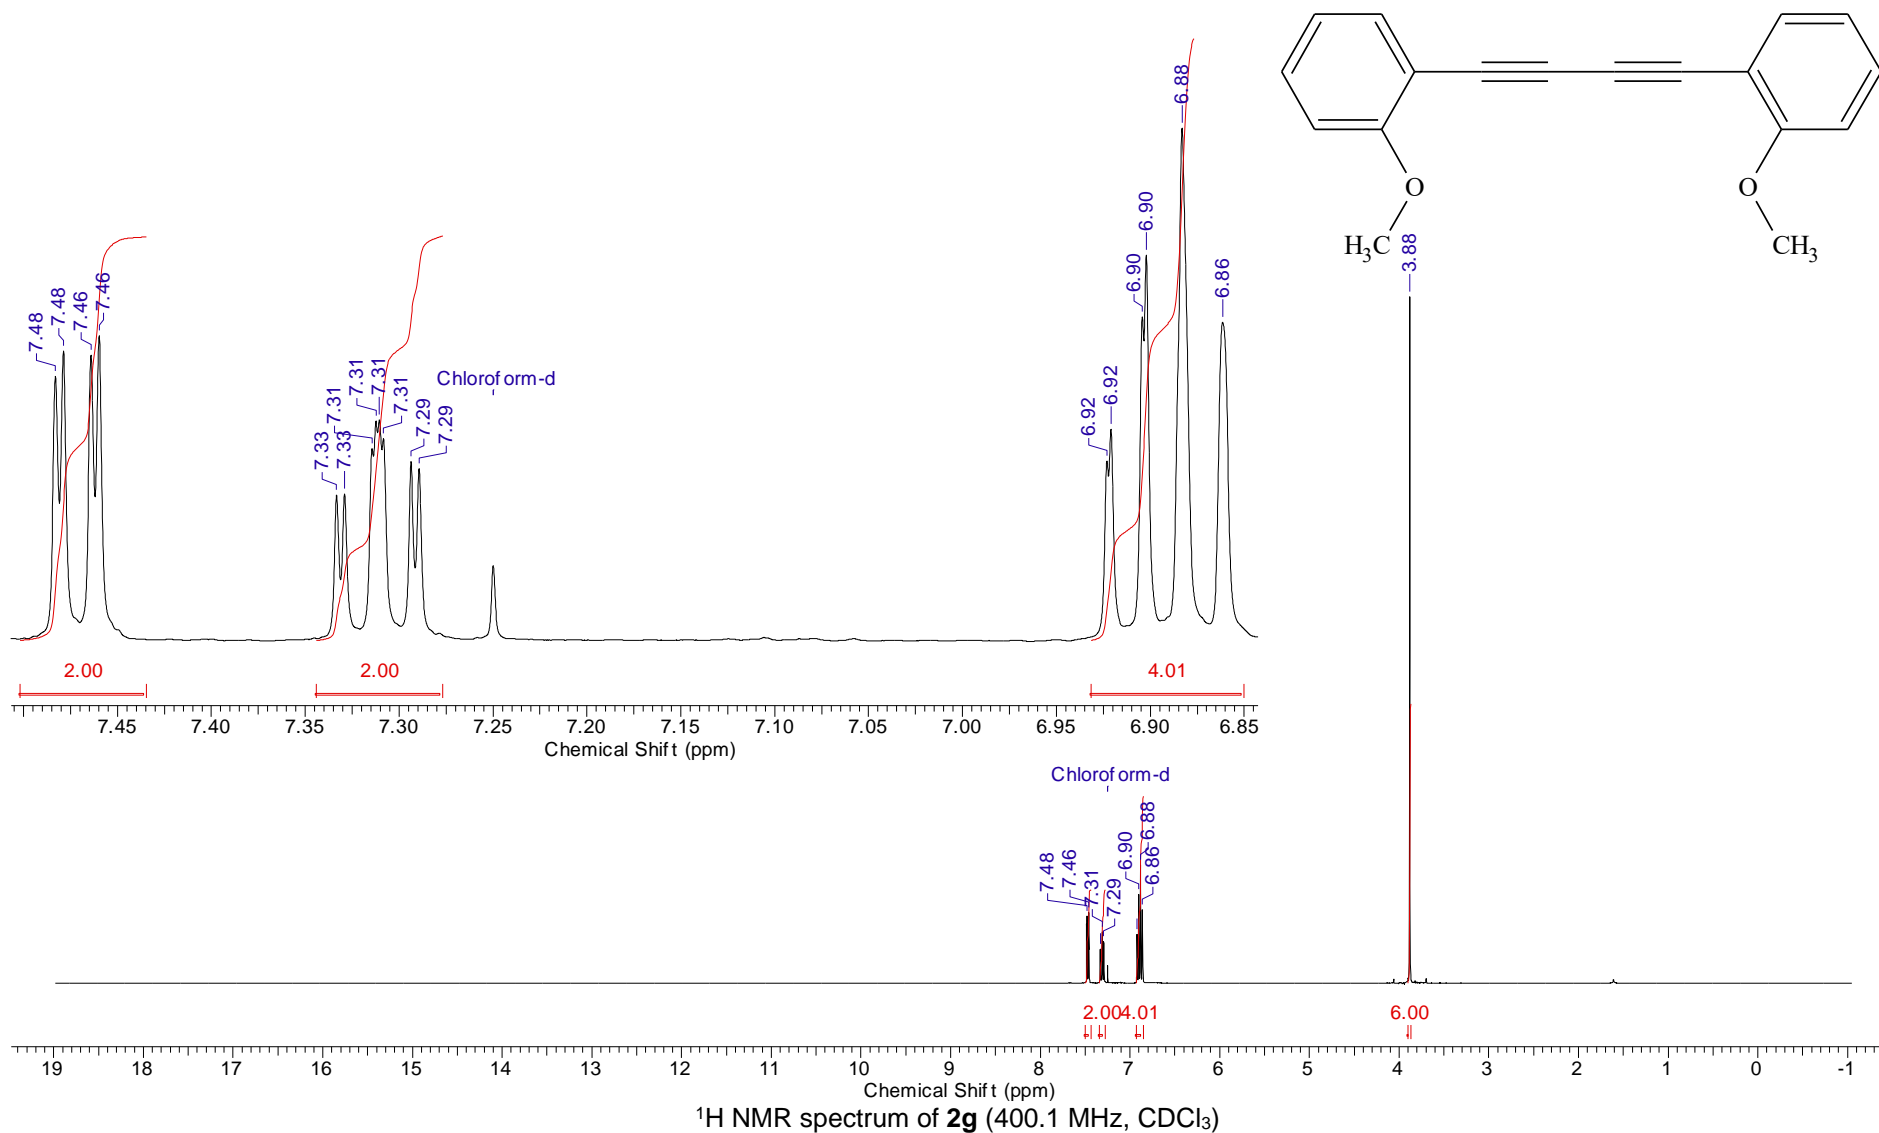

|                        |                                       |                        |                      |                |        |                      |              |
|------------------------|---------------------------------------|------------------------|----------------------|----------------|--------|----------------------|--------------|
| Acquisition Time (sec) | 0.6783                                | Comment                | Imported from UXMNR. |                | Date   | 06 Apr 2023 15:28:22 |              |
| File Name              | G:\S1\06.04.2023\BM-2775-Cr.C_002001r | Frequency (MHz)        | 100.61               | Nucleus        | 13C    | Number of Transients | 33           |
| Original Points Count  | 16384                                 | Points Count           | 131072               | Pulse Sequence | zgpg30 | Solvent              | CHLOROFORM-D |
| Sweep Width (Hz)       | 24154.59                              | Temperature (degree C) | 27.000               |                |        |                      |              |

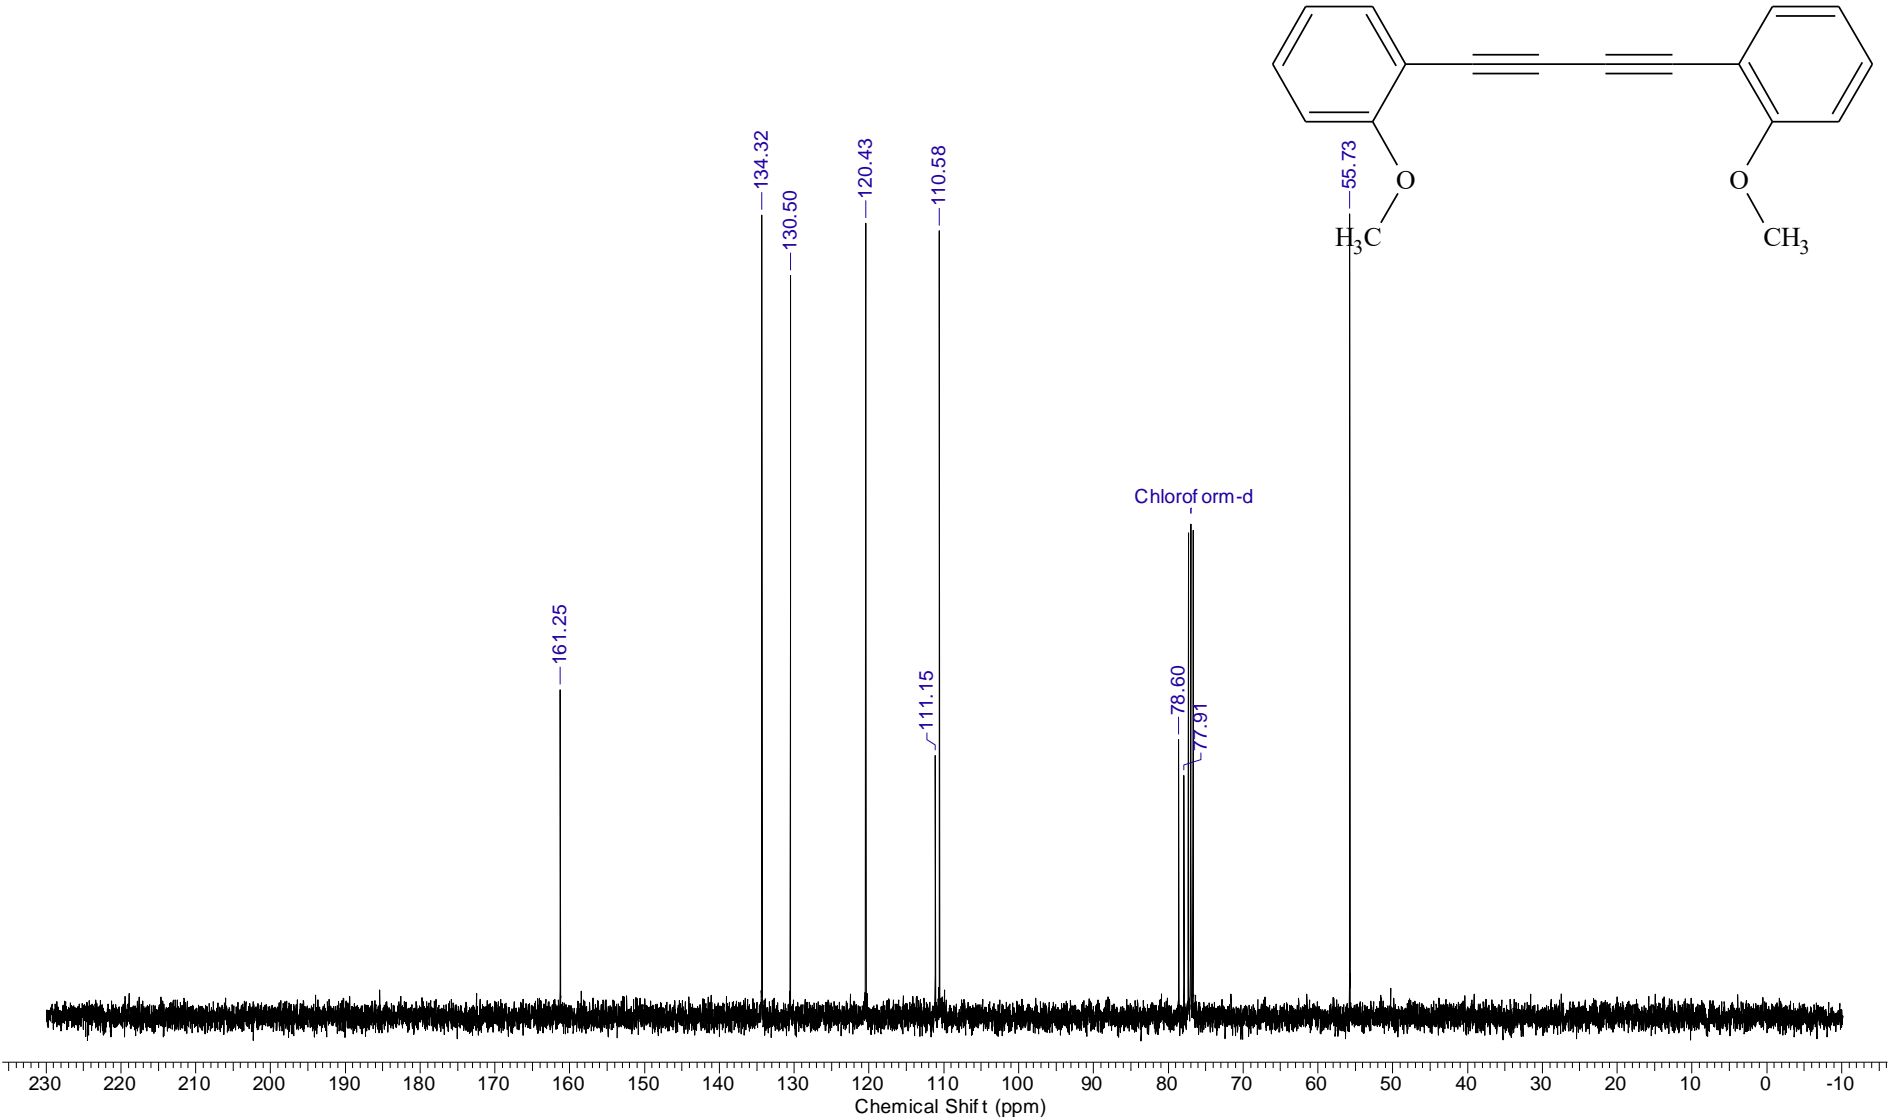

|                        |                                                        |                      |                      |                       |                      |
|------------------------|--------------------------------------------------------|----------------------|----------------------|-----------------------|----------------------|
| Acquisition Time (sec) | 4.0894                                                 | Comment              | Imported from UXNMR. | Date                  | 08 Apr 2023 13:41:44 |
| File Name              | C:\DOCS\OUTPUT_301\2023\04.äi ääü\BM-2780-Cr.H_001001r | Frequency (MHz)      | 400.13               | Points Count          | 131072               |
| Nucleus                | 1H                                                     | Number of Transients | 4                    | Original Points Count | 32768                |
| Pulse Sequence         | zg30                                                   | Solvent              | CHLOROFORM-D         | Sweep Width (Hz)      | 8012.82              |
| Temperature (degree C) | 27.000                                                 |                      |                      |                       |                      |

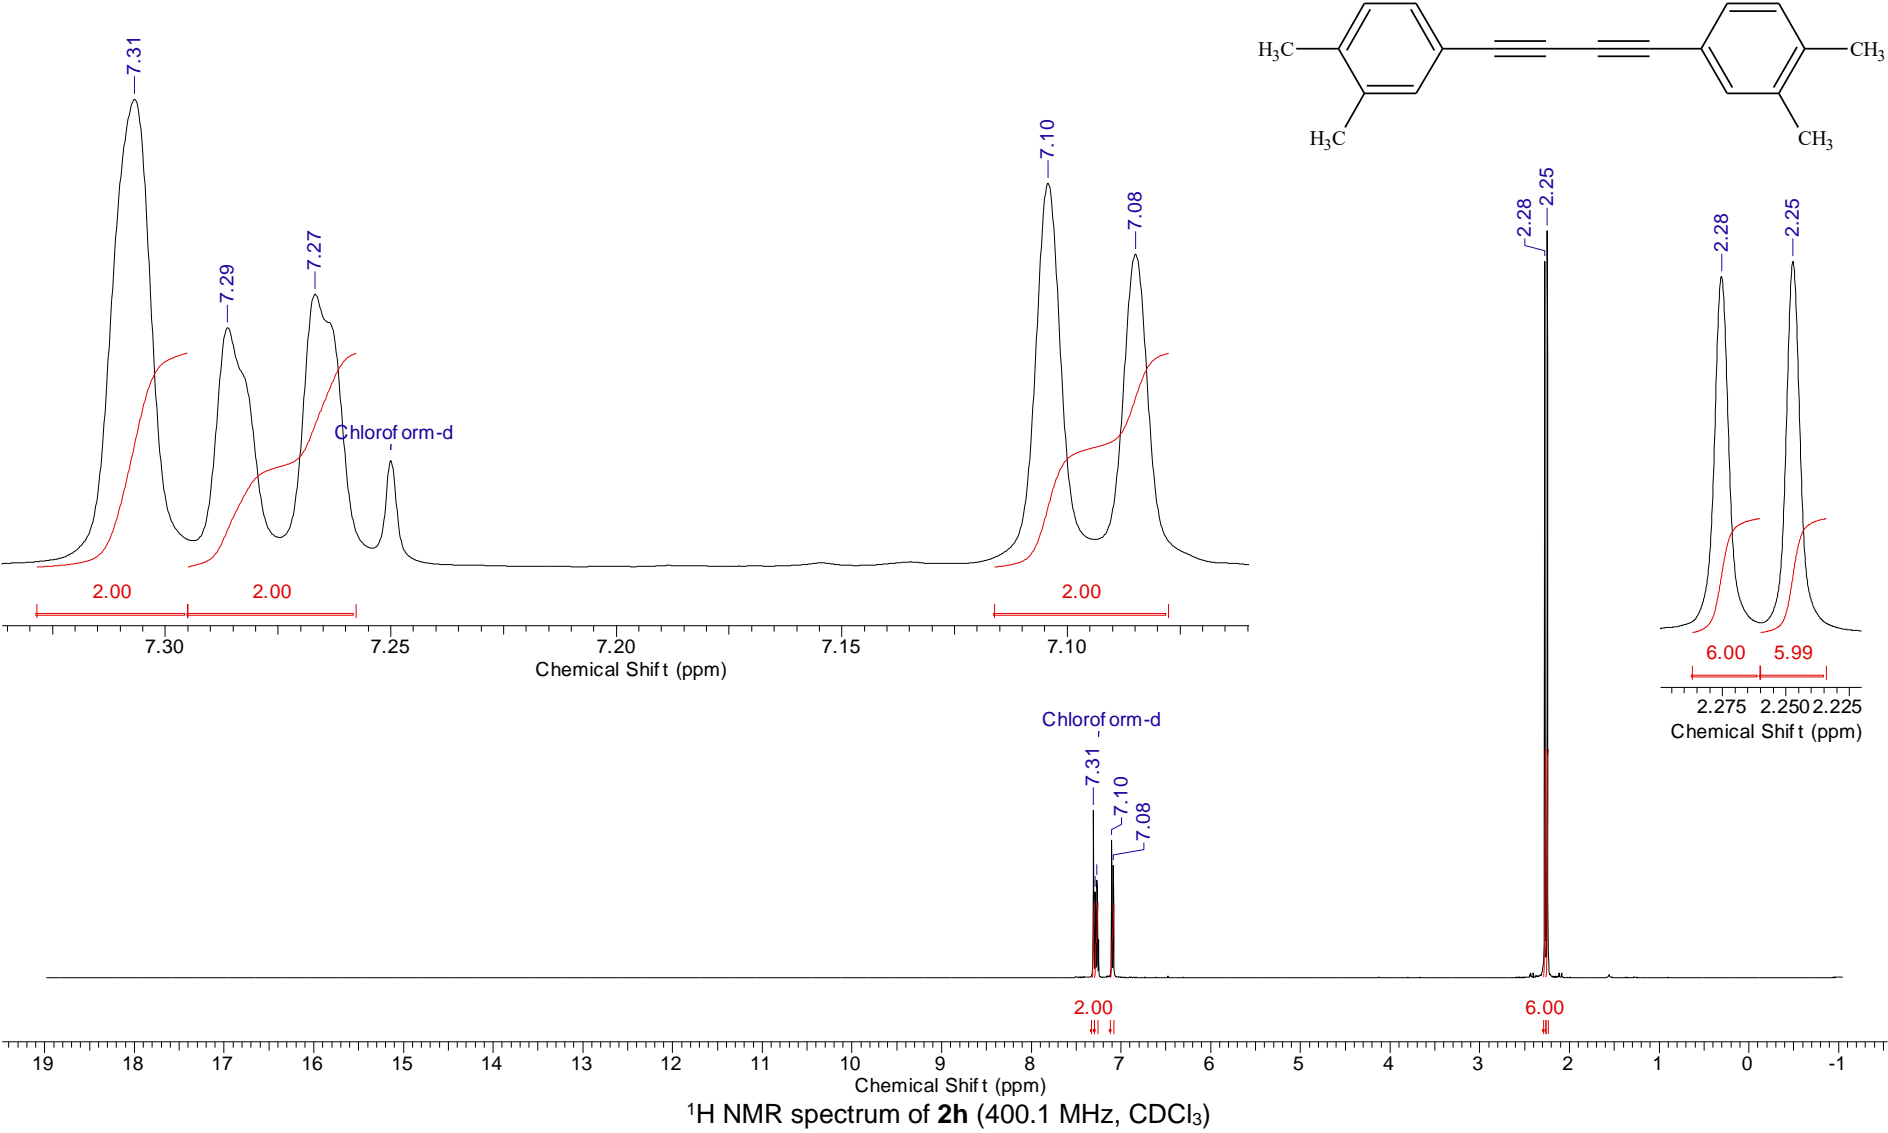

|                        |                                                        |                      |                      |                       |                      |
|------------------------|--------------------------------------------------------|----------------------|----------------------|-----------------------|----------------------|
| Acquisition Time (sec) | 0.6783                                                 | Comment              | Imported from UXNMR. | Date                  | 08 Apr 2023 13:44:50 |
| File Name              | C:\DOCS\OUTPUT_301\2023\04.äi ääü\BM-2780-Cr.C_002001r |                      |                      | Frequency (MHz)       | 100.61               |
| Nucleus                | 13C                                                    | Number of Transients | 30                   | Original Points Count | 16384                |
| Pulse Sequence         | zgpg30                                                 | Solvent              | DEUTERIUM OXIDE      | Points Count          | 131072               |
| Temperature (degree C) | 27.000                                                 |                      |                      | Sweep Width (Hz)      | 24154.59             |

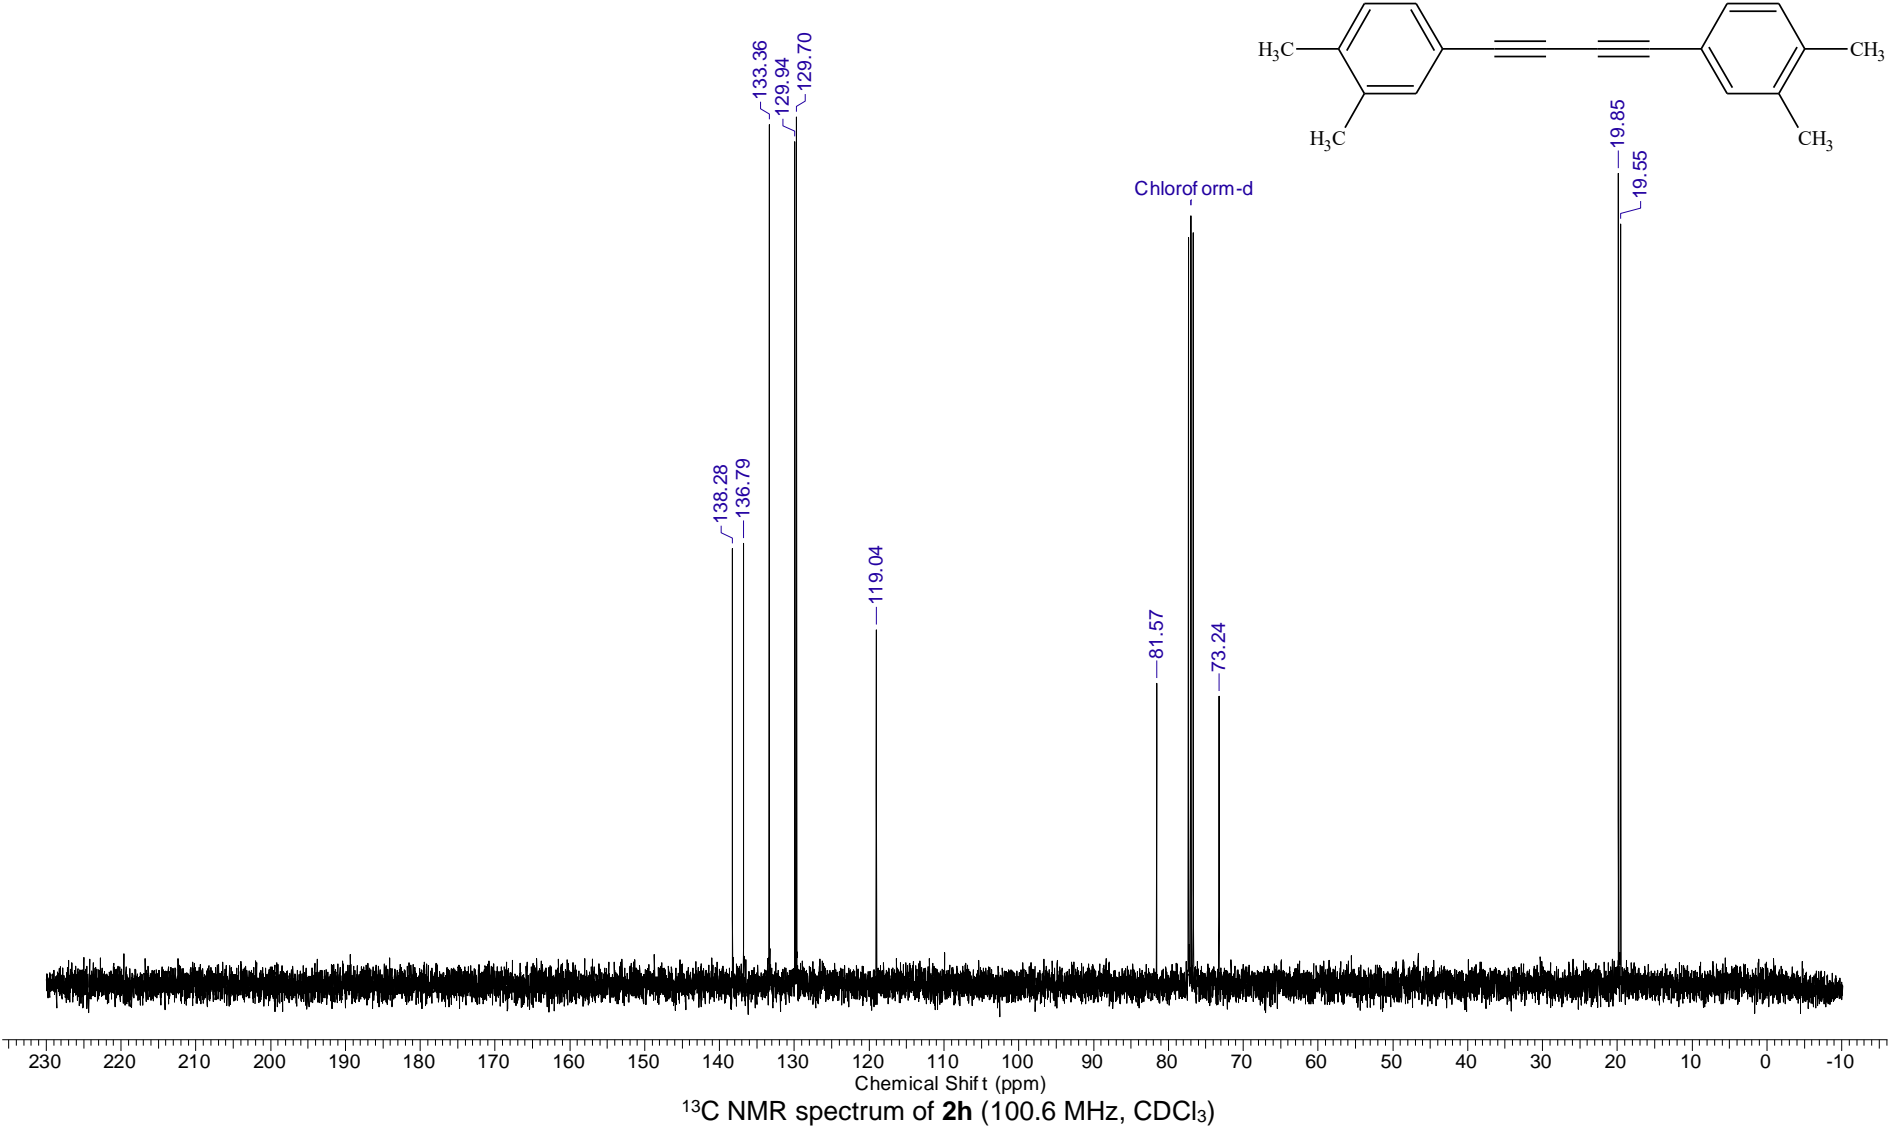

|                               |                                                      |                              |                      |                               |             |                      |
|-------------------------------|------------------------------------------------------|------------------------------|----------------------|-------------------------------|-------------|----------------------|
| <b>Acquisition Time (sec)</b> | 4.0894                                               | <b>Comment</b>               | Imported from UXNMR. |                               | <b>Date</b> | 19 May 2023 15:37:54 |
| <b>File Name</b>              | C:\DOCS\OUTPUT_301\2023\05\1 à à\BM-2821-2.H_001001r | <b>Frequency (MHz)</b>       | 400.13               | <b>Nucleus</b>                | 1H          |                      |
| <b>Number of Transients</b>   | 4                                                    | <b>Original Points Count</b> | 32768                | <b>Points Count</b>           | 131072      |                      |
| <b>Solvent</b>                | CHLOROFORM-D                                         | <b>Sweep Width (Hz)</b>      | 8012.82              | <b>Pulse Sequence</b>         | zg30        |                      |
|                               |                                                      |                              |                      | <b>Temperature (degree C)</b> | 27.000      |                      |

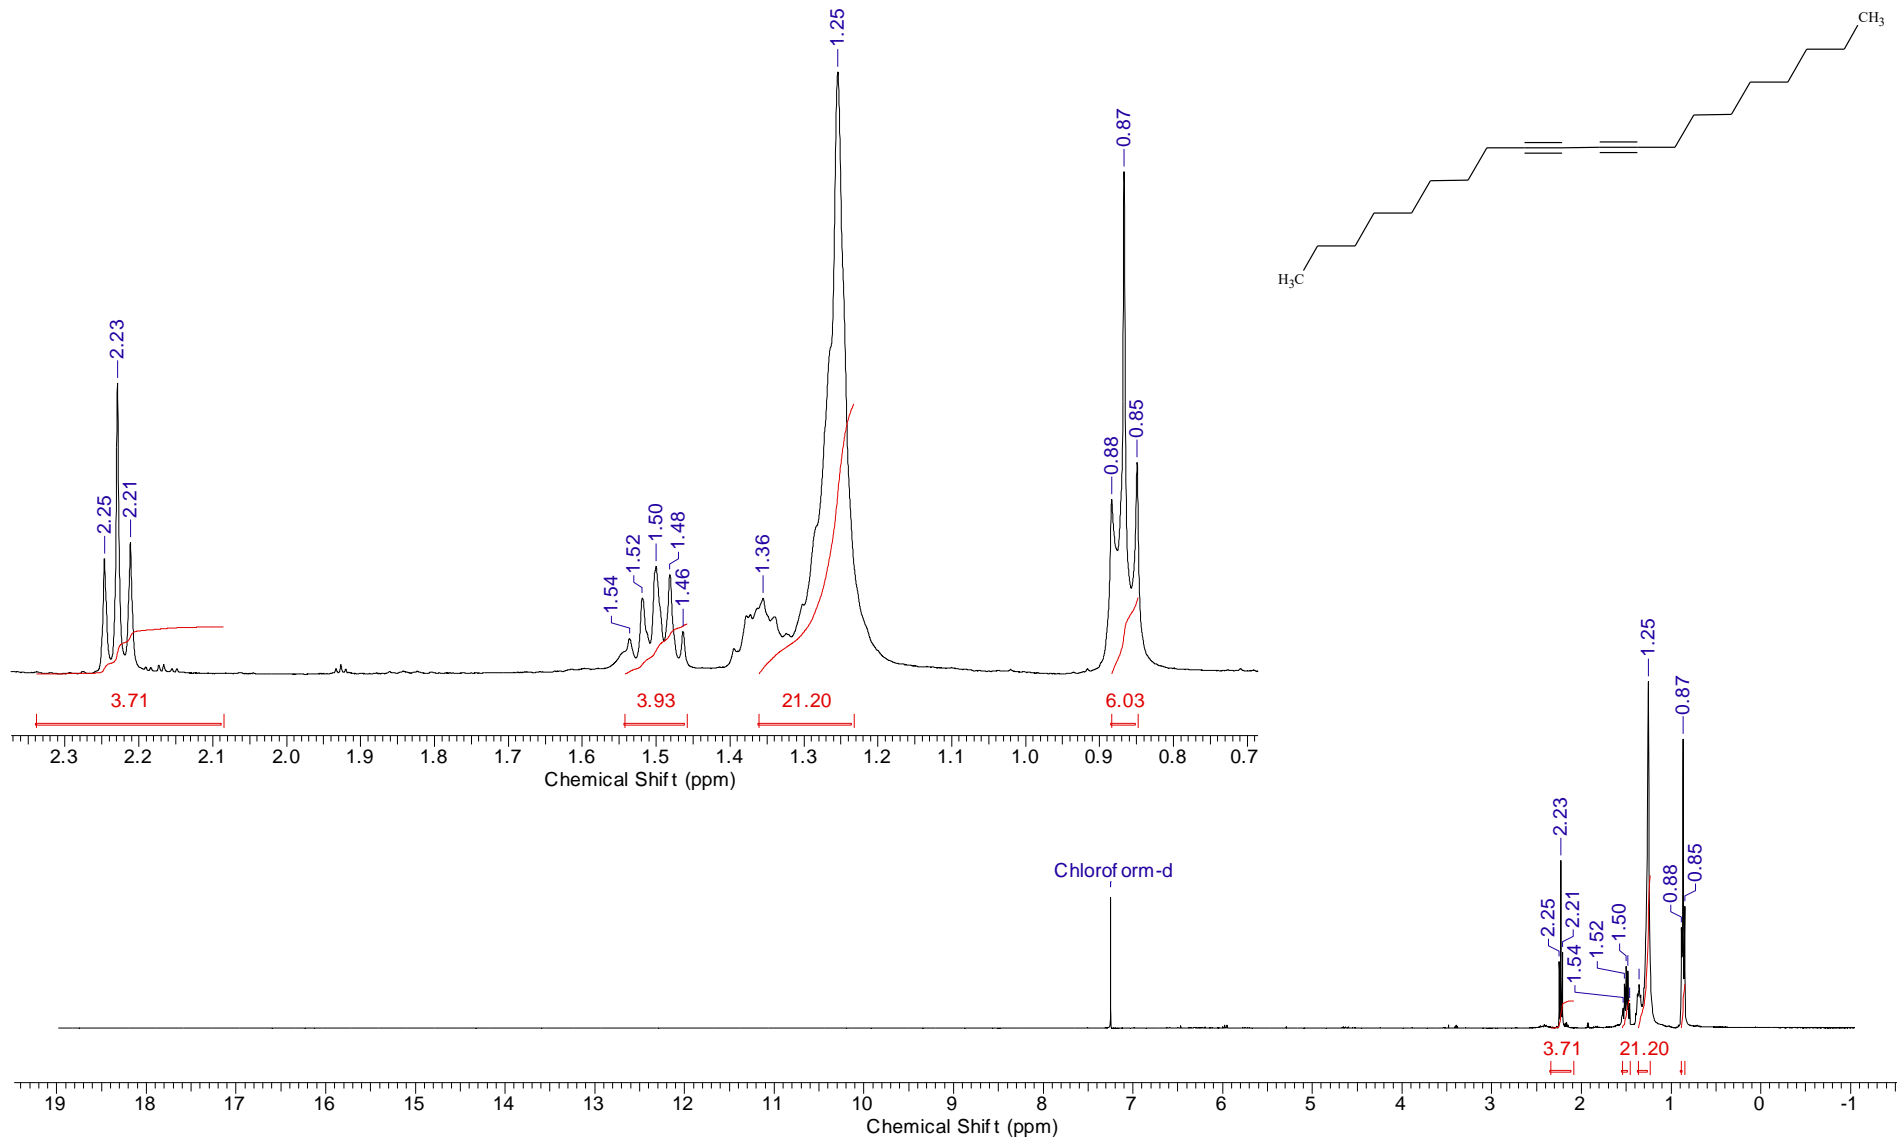<sup>1</sup>H NMR spectrum of **2i** (400.1 MHz, CDCl<sub>3</sub>)



|                        |                              |                      |                      |                       |                  |                      |        |
|------------------------|------------------------------|----------------------|----------------------|-----------------------|------------------|----------------------|--------|
| Acquisition Time (sec) | 0.6783                       | Comment              | Imported from UXNMR. |                       | Date             | 20 May 2023 12:46:00 |        |
| File Name              | C:\DOCS\BM\BM-2821-2_002001r |                      |                      |                       | Frequency (MHz)  | 100.61               |        |
| Nucleus                | 13C                          | Number of Transients | 152                  | Original Points Count | 16384            | Points Count         | 131072 |
| Pulse Sequence         | zgpg30                       | Solvent              | CHLOROFORM-D         |                       | Sweep Width (Hz) | 24154.59             |        |
| Temperature (degree C) | 27.000                       |                      |                      |                       |                  |                      |        |

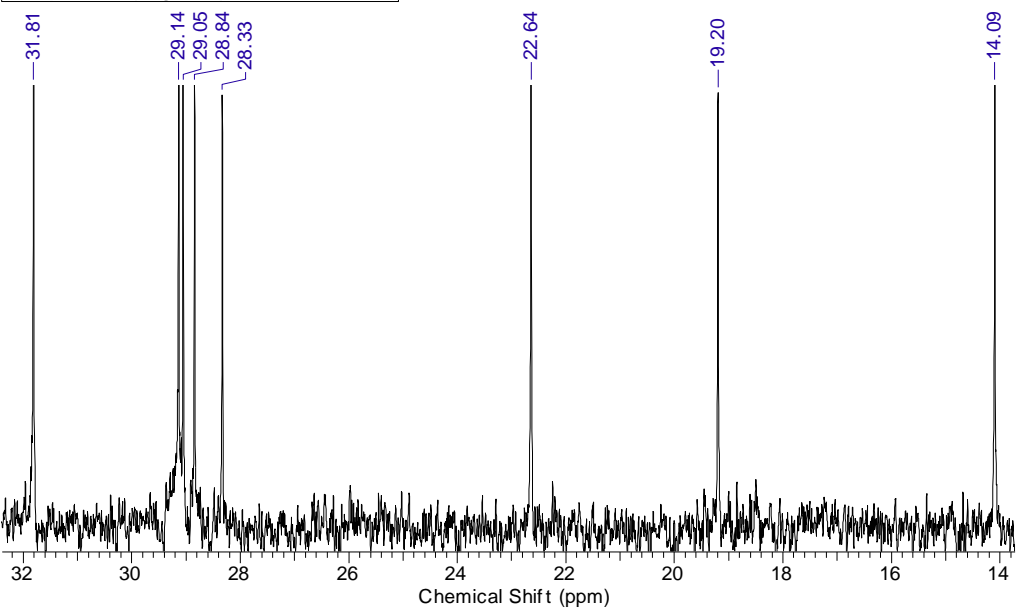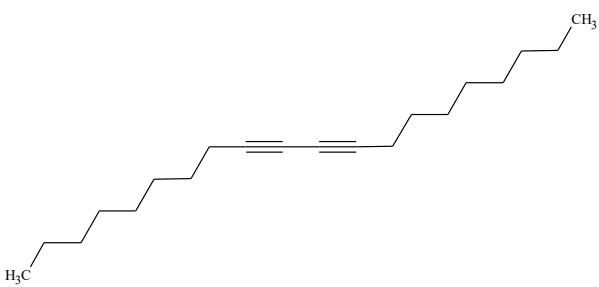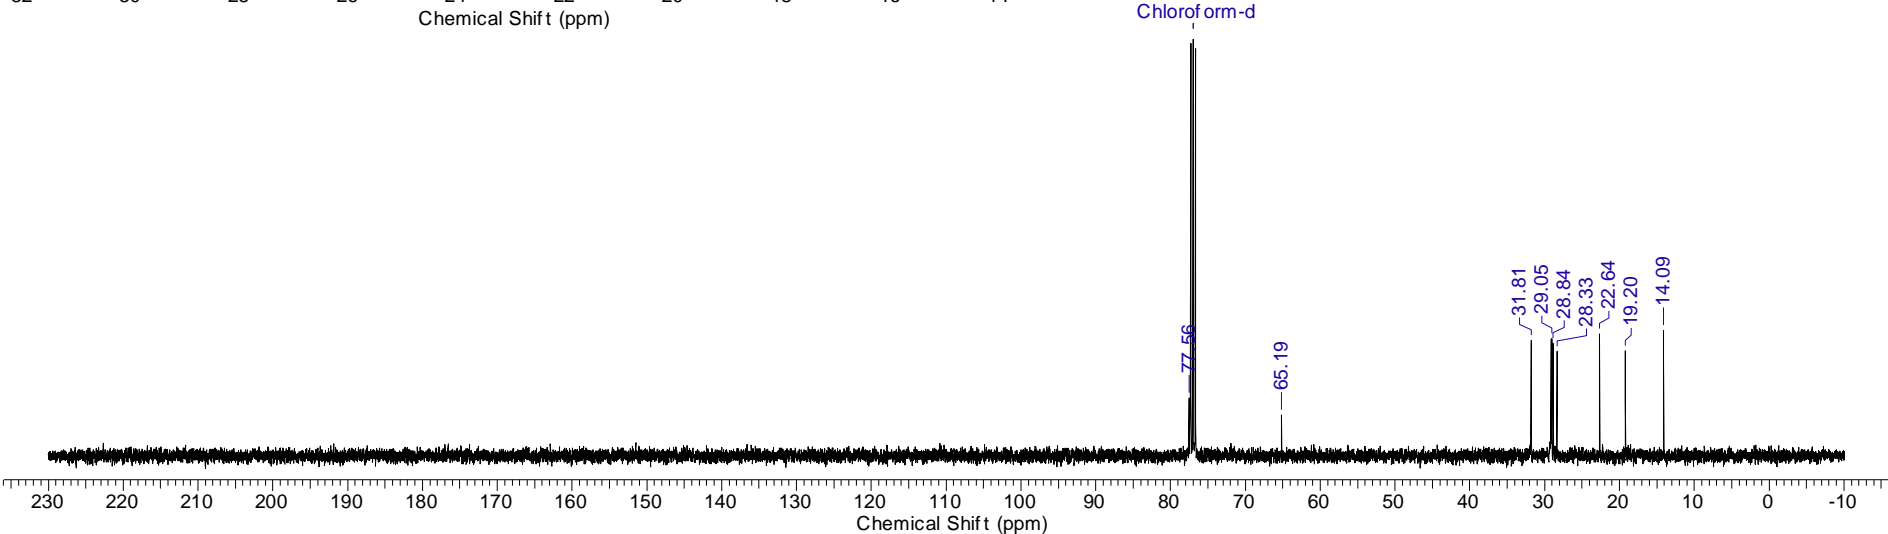

<sup>13</sup>C NMR spectrum of 2i (100.6 MHz, CDCl<sub>3</sub>)

|                               |                                                          |                             |                      |                              |                      |
|-------------------------------|----------------------------------------------------------|-----------------------------|----------------------|------------------------------|----------------------|
| <b>Acquisition Time (sec)</b> | 4.0894                                                   | <b>Comment</b>              | Imported from UXMNR. | <b>Date</b>                  | 04 Apr 2023 15:26:44 |
| <b>File Name</b>              | G:\DISK_ULTRA\SPEC_H.C 2023\04.år åæüBM-2773-2.H_001001r |                             |                      | <b>Frequency (MHz)</b>       | 400.13               |
| <b>Nucleus</b>                | <sup>1</sup> H                                           | <b>Number of Transients</b> | 4                    | <b>Original Points Count</b> | 32768                |
| <b>Pulse Sequence</b>         | zg30                                                     | <b>Solvent</b>              | CHLOROFORM-D         | <b>Points Count</b>          | 131072               |
| <b>Temperature (degree C)</b> | 27.000                                                   |                             |                      | <b>Sweep Width (Hz)</b>      | 8012.82              |

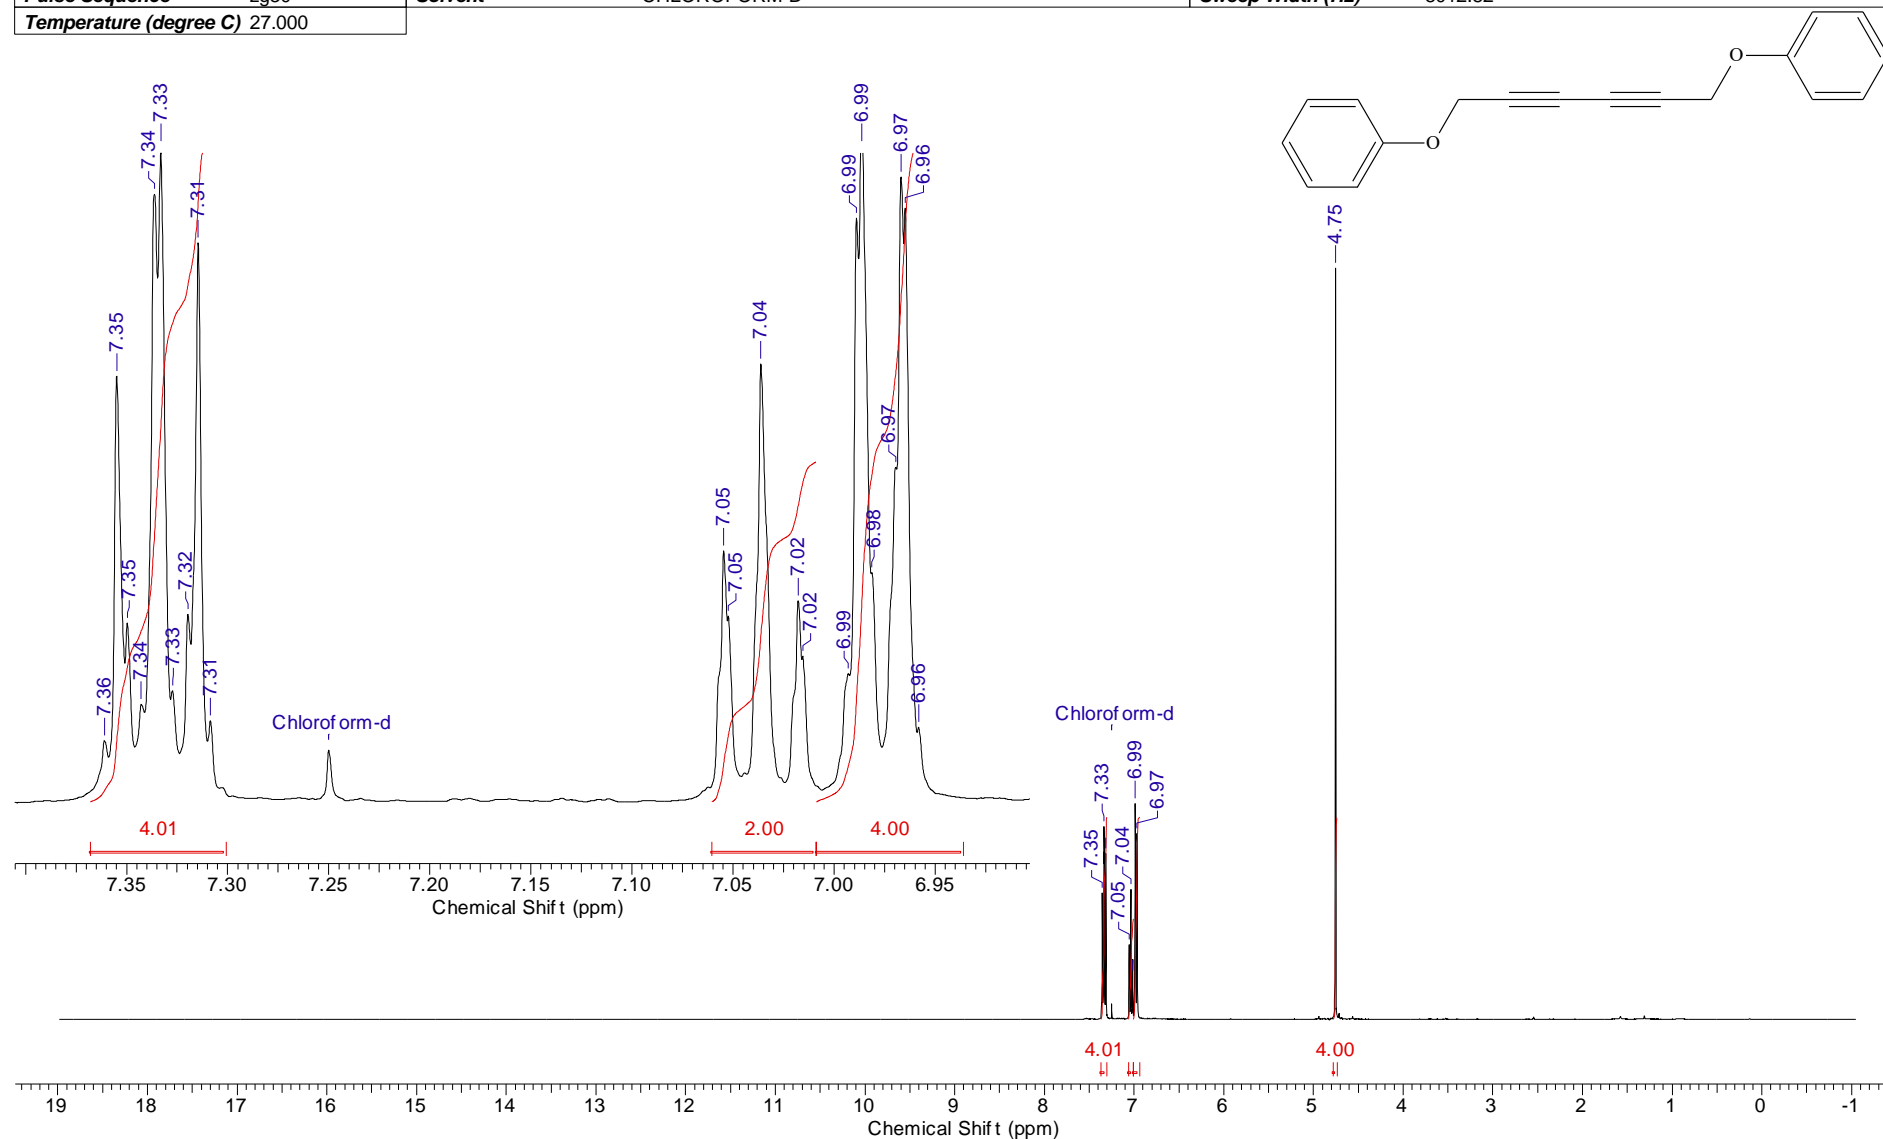<sup>1</sup>H NMR spectrum of **2j** (400.1 MHz, CDCl<sub>3</sub>)

|                        |                                                            |                      |                      |                       |                  |                      |        |
|------------------------|------------------------------------------------------------|----------------------|----------------------|-----------------------|------------------|----------------------|--------|
| Acquisition Time (sec) | 0.6783                                                     | Comment              | Imported from UXNMR. |                       | Date             | 04 Apr 2023 15:31:22 |        |
| File Name              | G:\DISK_ULTRA\SPEC_H,C_2023\04.äi ðäëü\BM-2773-2.C_002001r |                      |                      |                       | Frequency (MHz)  | 100.61               |        |
| Nucleus                | 13C                                                        | Number of Transients | 26                   | Original Points Count | 16384            | Points Count         | 131072 |
| Pulse Sequence         | zgpg30                                                     | Solvent              | DEUTERIUM OXIDE      |                       | Sweep Width (Hz) | 24154.59             |        |
| Temperature (degree C) | 27.000                                                     |                      |                      |                       |                  |                      |        |

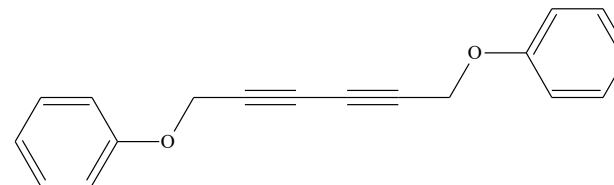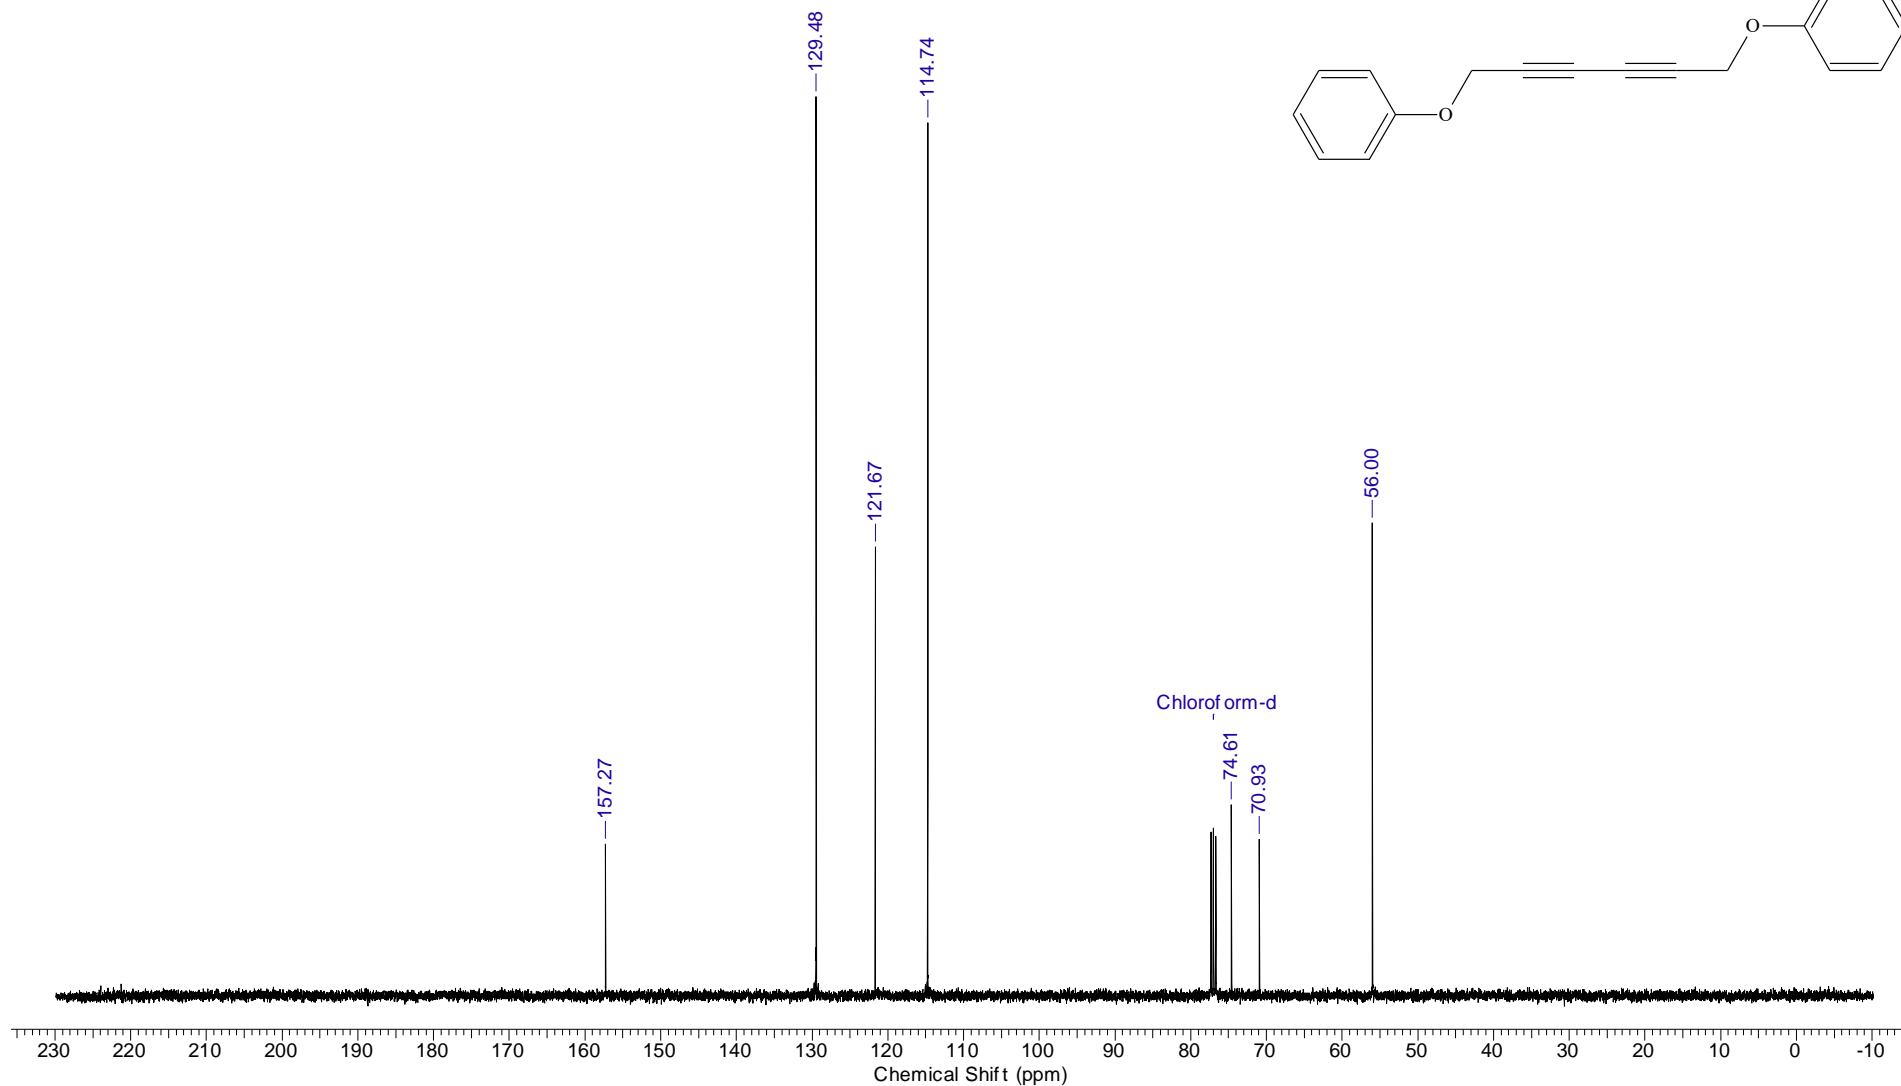

<sup>13</sup>C NMR spectrum of **2j** (100.6 MHz, CDCl<sub>3</sub>)

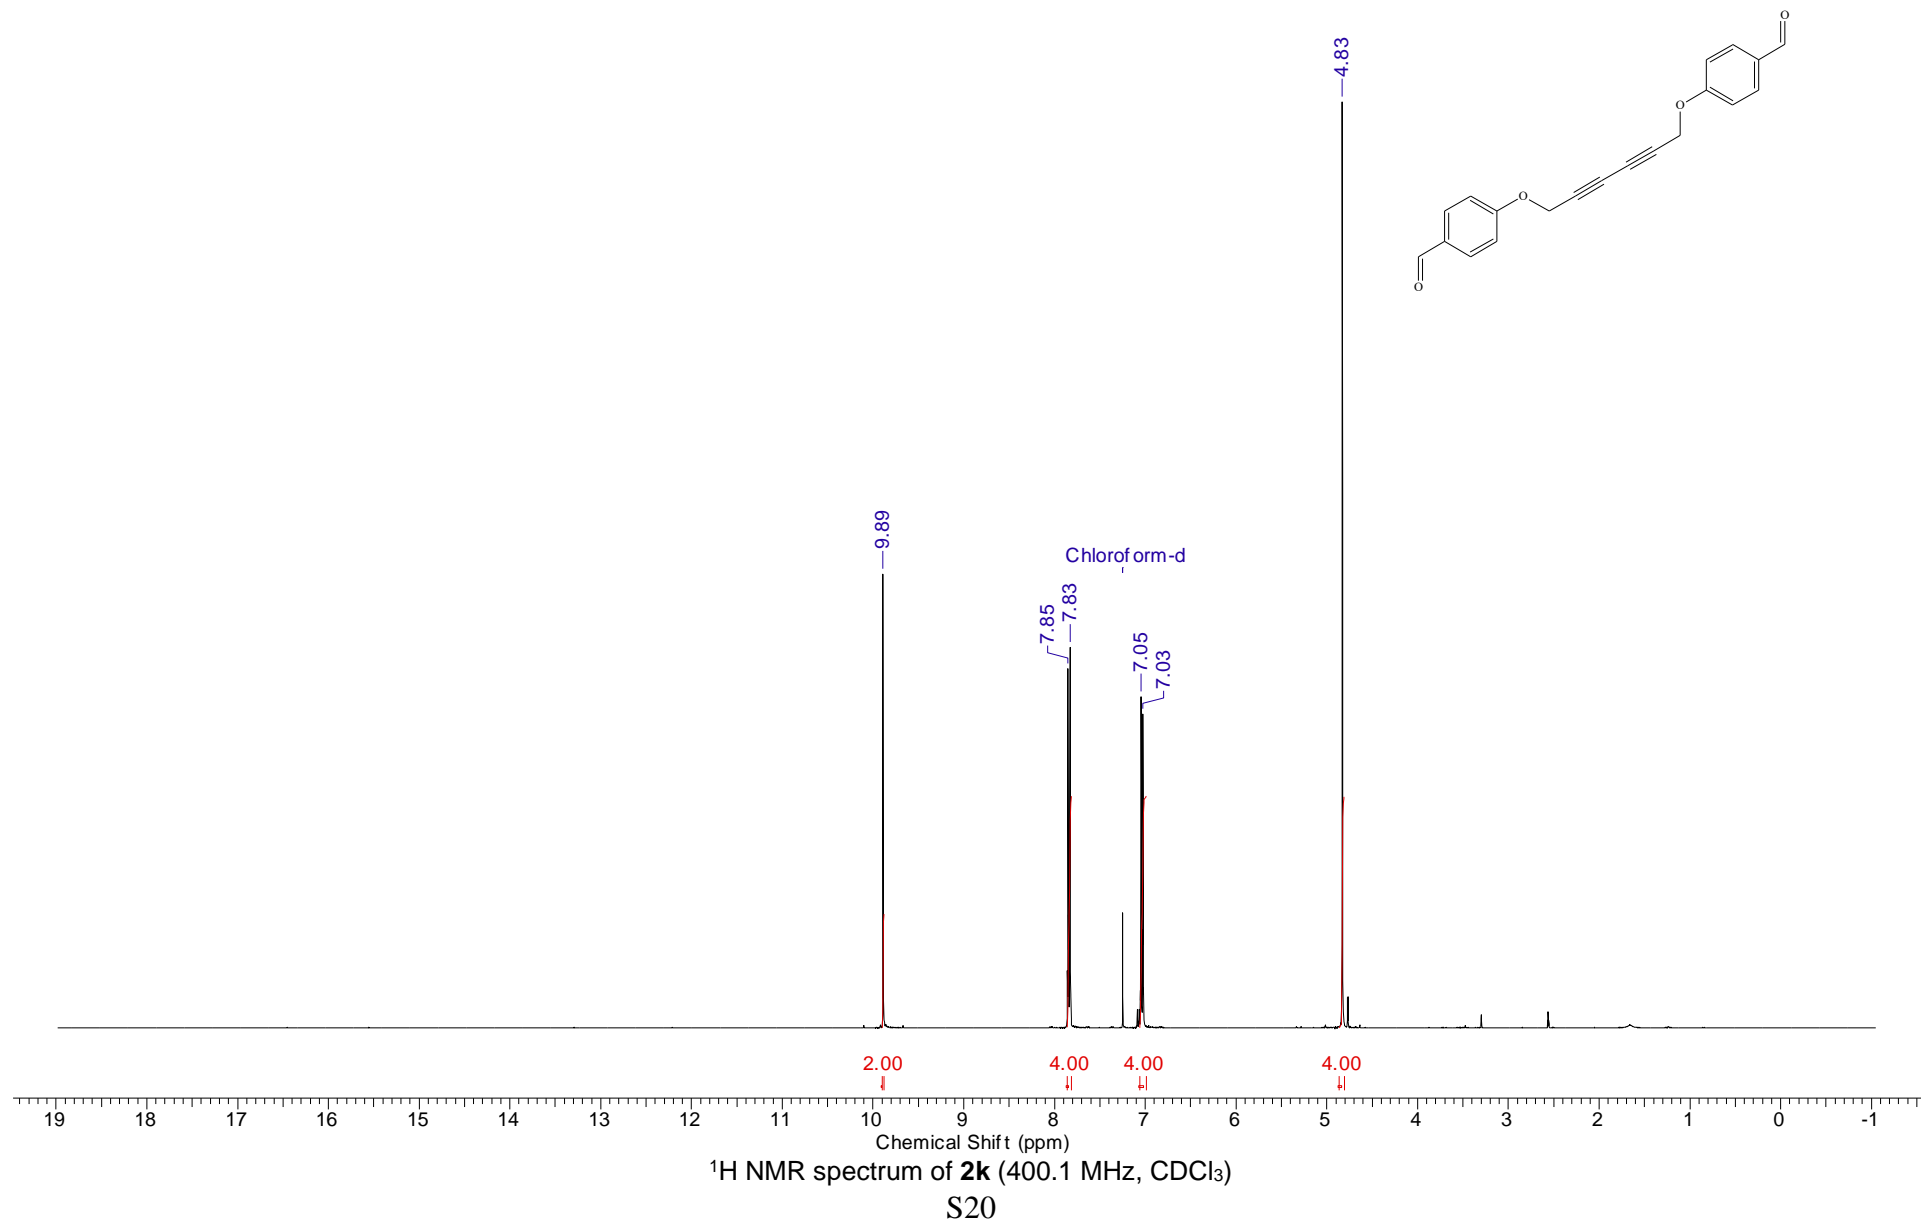

|                        |                                                  |                       |                      |  |                        |                      |  |
|------------------------|--------------------------------------------------|-----------------------|----------------------|--|------------------------|----------------------|--|
| Acquisition Time (sec) | 0.6783                                           | Comment               | Imported from UXNMR. |  | Date                   | 16 May 2023 15:32:06 |  |
| File Name              | C:\DOCS\OUTPUT_301\2023\05\1\BM-2815-C.C_002001r | Frequency (MHz)       | 100.61               |  | Nucleus                | 13C                  |  |
| Number of Transients   | 89                                               | Original Points Count | 16384                |  | Pulse Sequence         | zgpg30               |  |
| Solvent                | DEUTERIUM OXIDE                                  | Sweep Width (Hz)      | 24154.59             |  | Temperature (degree C) | 27.000               |  |

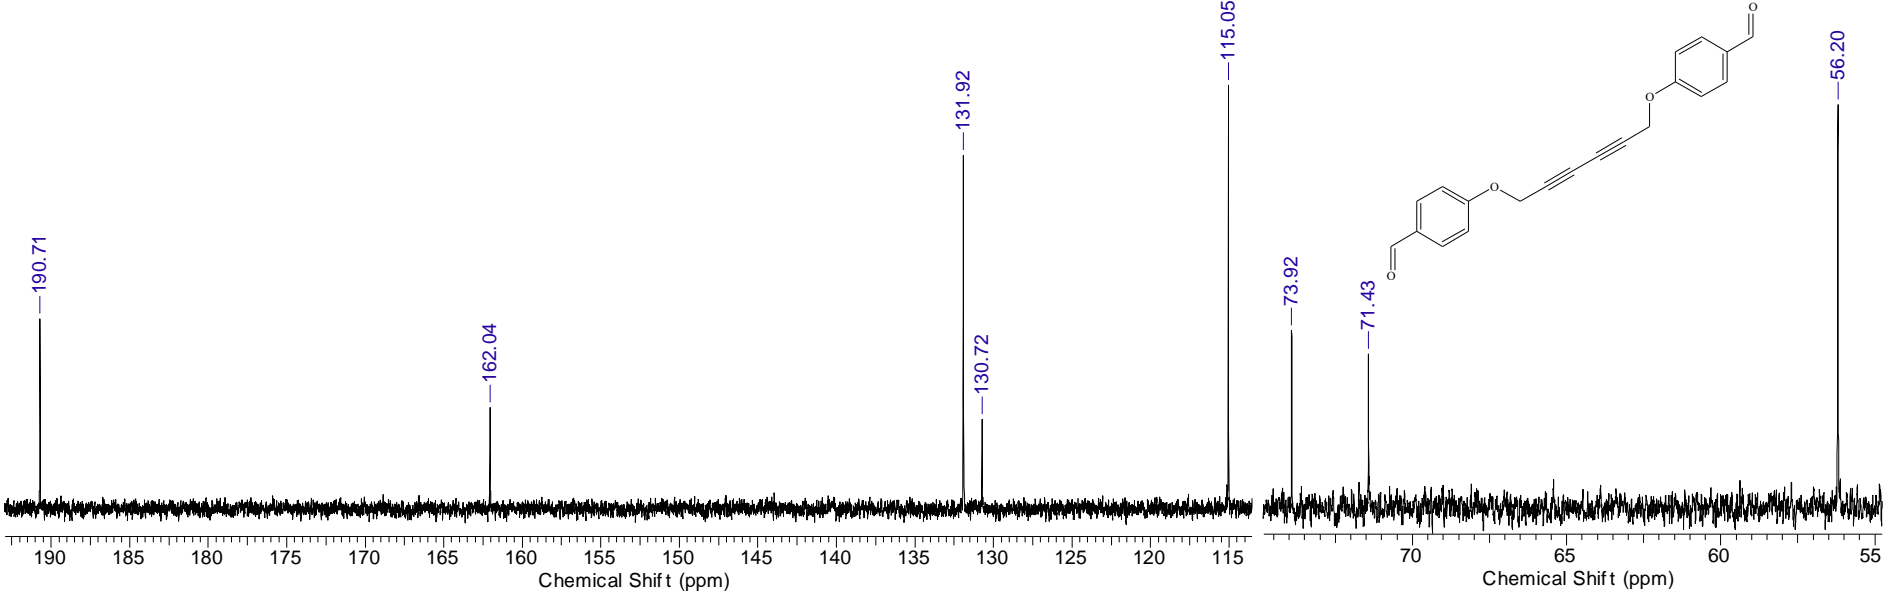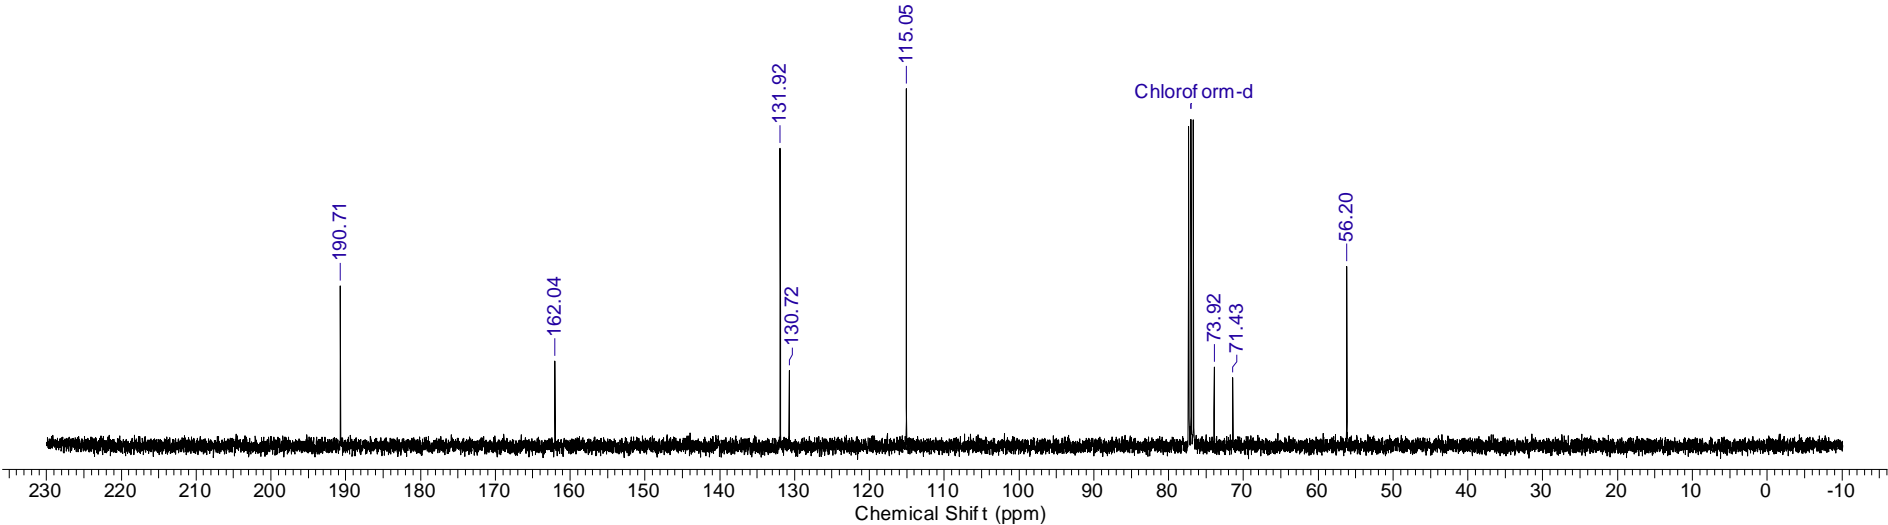

<sup>13</sup>C NMR spectrum of **2k** (100.6 MHz, CDCl<sub>3</sub>)

|                               |                                                        |                             |                      |                              |                        |                               |        |
|-------------------------------|--------------------------------------------------------|-----------------------------|----------------------|------------------------------|------------------------|-------------------------------|--------|
| <b>Acquisition Time (sec)</b> | 4.0894                                                 | <b>Comment</b>              | Imported from UXNMR. |                              | <b>Date</b>            | 24 Dec 2021 15:52:36          |        |
| <b>File Name</b>              | C:\DOCS\OUTPUT_301\2021\12.aaaaduu\BM-2366-c.H_001001r |                             |                      |                              | <b>Frequency (MHz)</b> | 400.13                        |        |
| <b>Nucleus</b>                | 1H                                                     | <b>Number of Transients</b> | 4                    | <b>Original Points Count</b> | 32768                  | <b>Points Count</b>           | 131072 |
| <b>Pulse Sequence</b>         | zg30                                                   | <b>Solvent</b>              | Acetone              | <b>Sweep Width (Hz)</b>      | 8012.82                | <b>Temperature (degree C)</b> | 27.000 |

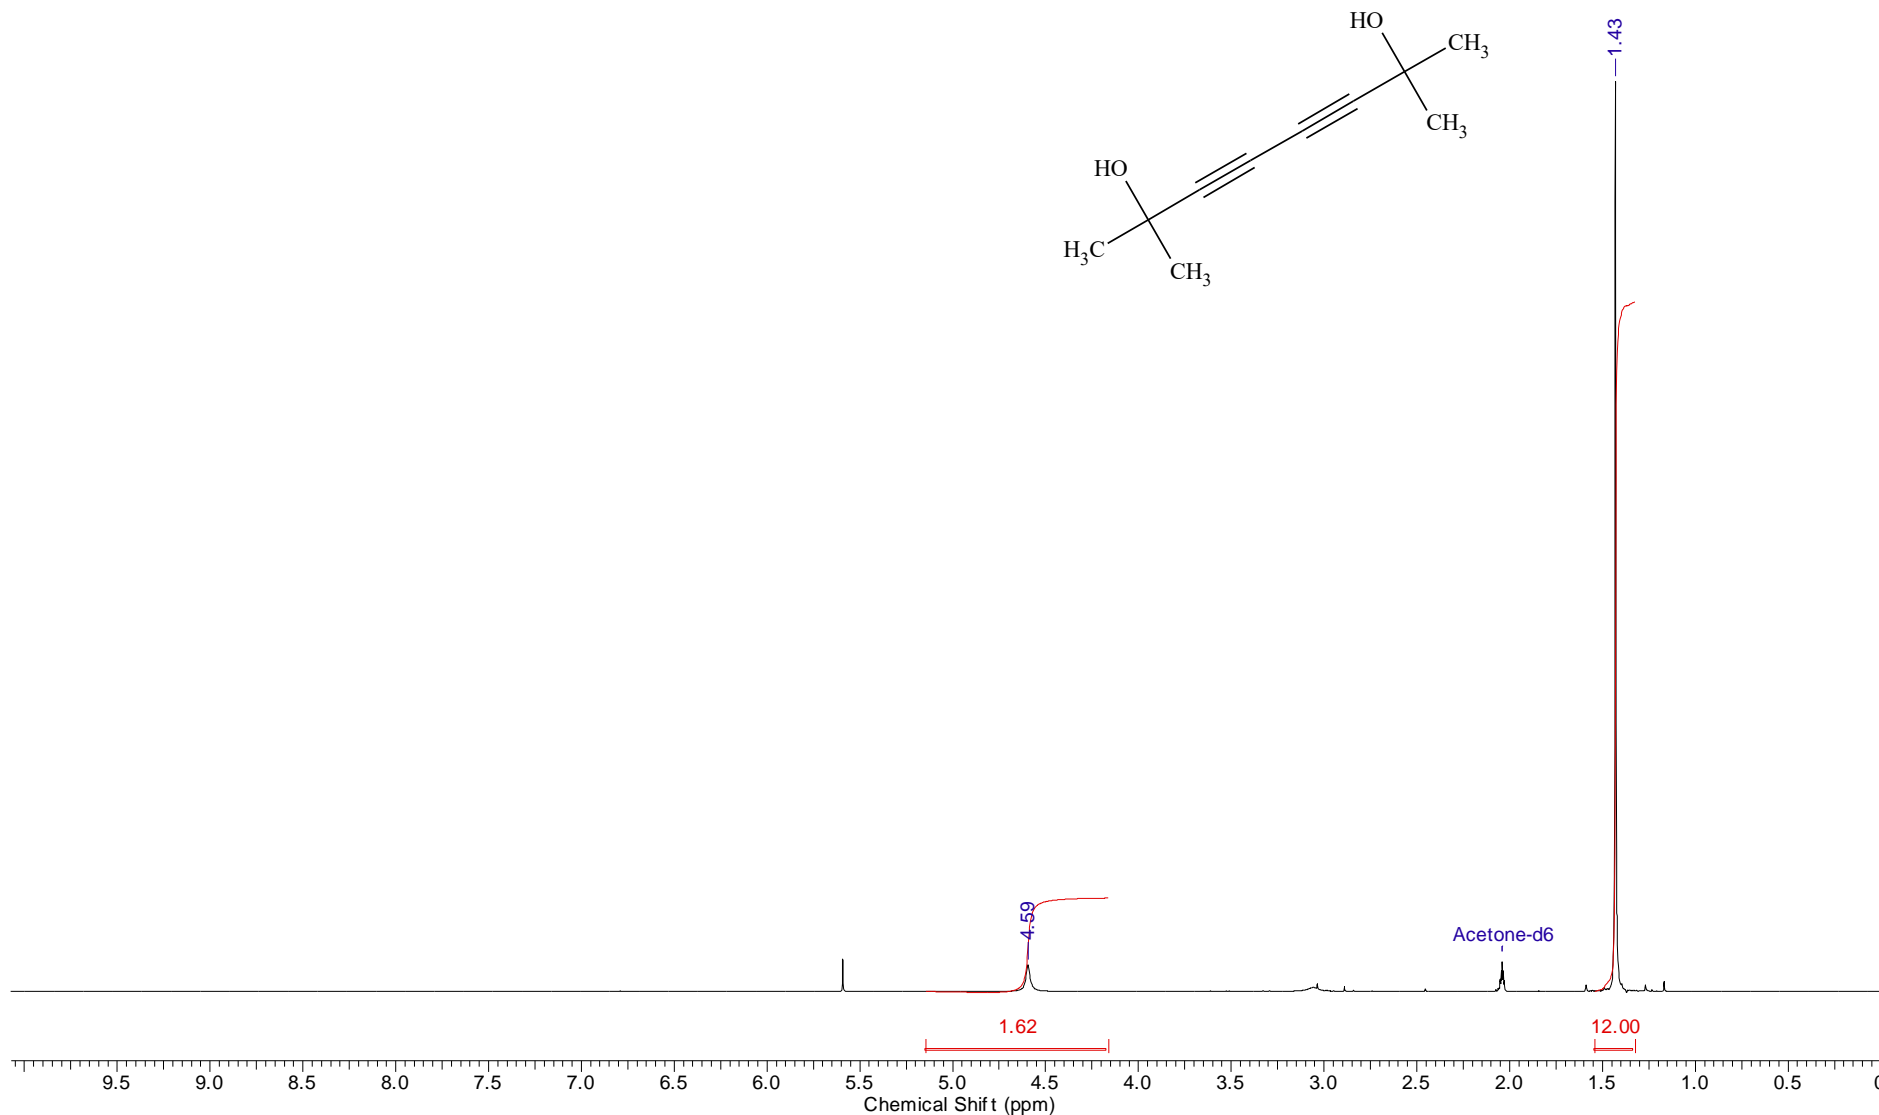

|                        |                                                           |                      |              |                       |                      |                  |              |                      |  |
|------------------------|-----------------------------------------------------------|----------------------|--------------|-----------------------|----------------------|------------------|--------------|----------------------|--|
| Acquisition Time (sec) | 0.6783                                                    | Comment              |              |                       | Imported from UXNMR. |                  | Date         | 24 Dec 2021 15:54:28 |  |
| File Name              | G:\DISK_ULTRA\SPEC_H,C_2021\12.ääääöü\BM-2366-c.C_002001r |                      |              |                       |                      | Frequency (MHz)  |              | 100.61               |  |
| Nucleus                | 13C                                                       | Number of Transients | 25           | Original Points Count | 16384                |                  | Points Count | 131072               |  |
| Pulse Sequence         | zgpg30                                                    | Solvent              | CHLOROFORM-D |                       |                      | Sweep Width (Hz) |              | 24154.59             |  |
| Temperature (degree C) | 27.000                                                    |                      |              |                       |                      |                  |              |                      |  |

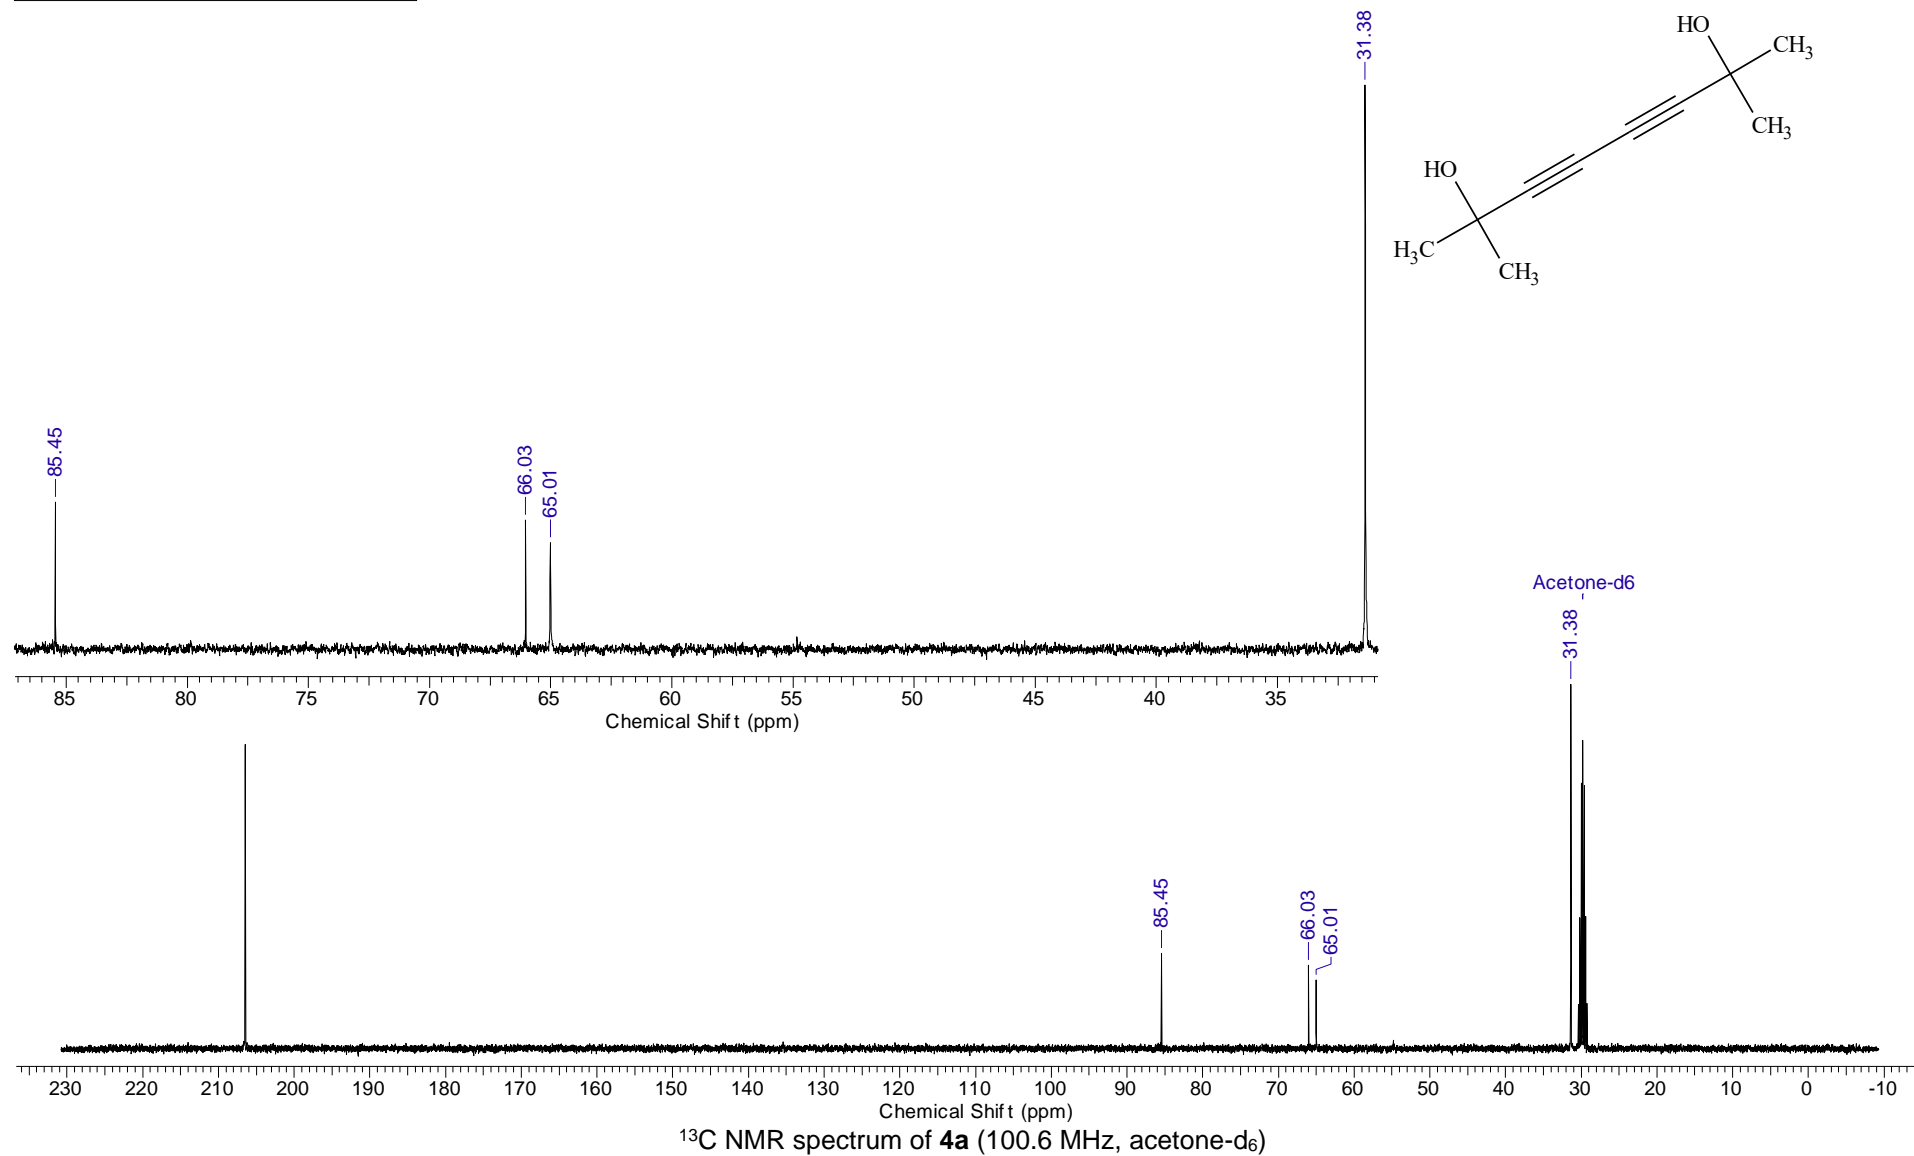

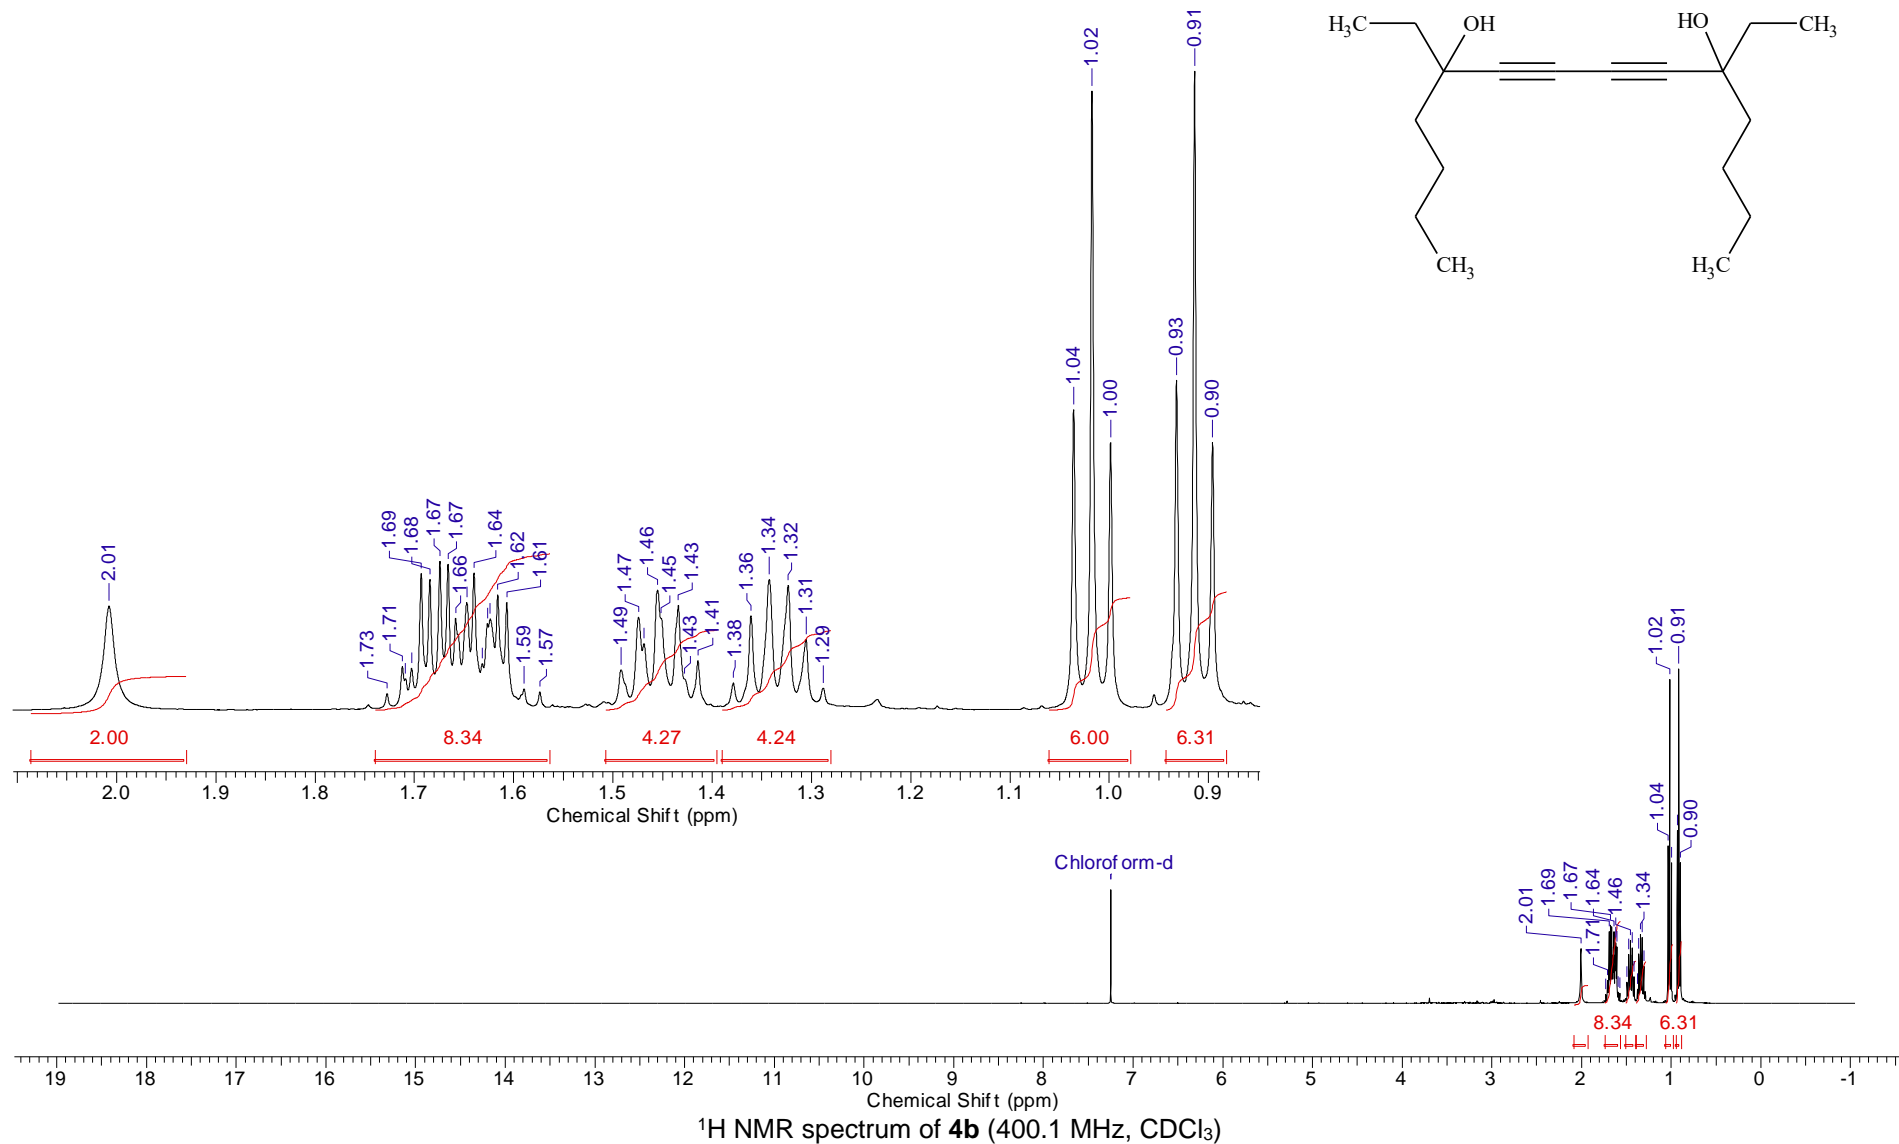



|                               |                                                               |                             |                      |                              |                         |                      |        |
|-------------------------------|---------------------------------------------------------------|-----------------------------|----------------------|------------------------------|-------------------------|----------------------|--------|
| <b>Acquisition Time (sec)</b> | 0.6783                                                        | <b>Comment</b>              | Imported from UXNMR. |                              | <b>Date</b>             | 25 Dec 2021 23:04:58 |        |
| <b>File Name</b>              | C:\BM_DATA\DOCS\B1 D_01_0000\2021\BM-2397-2\BM-2397-2_002001r |                             |                      |                              | <b>Frequency (MHz)</b>  | 100.61               |        |
| <b>Nucleus</b>                | 13C                                                           | <b>Number of Transients</b> | 64                   | <b>Original Points Count</b> | 16384                   | <b>Points Count</b>  | 131072 |
| <b>Pulse Sequence</b>         | zgpg30                                                        | <b>Solvent</b>              | CHLOROFORM-D         |                              | <b>Sweep Width (Hz)</b> | 24154.59             |        |
| <b>Temperature (degree C)</b> | 27.000                                                        |                             |                      |                              |                         |                      |        |

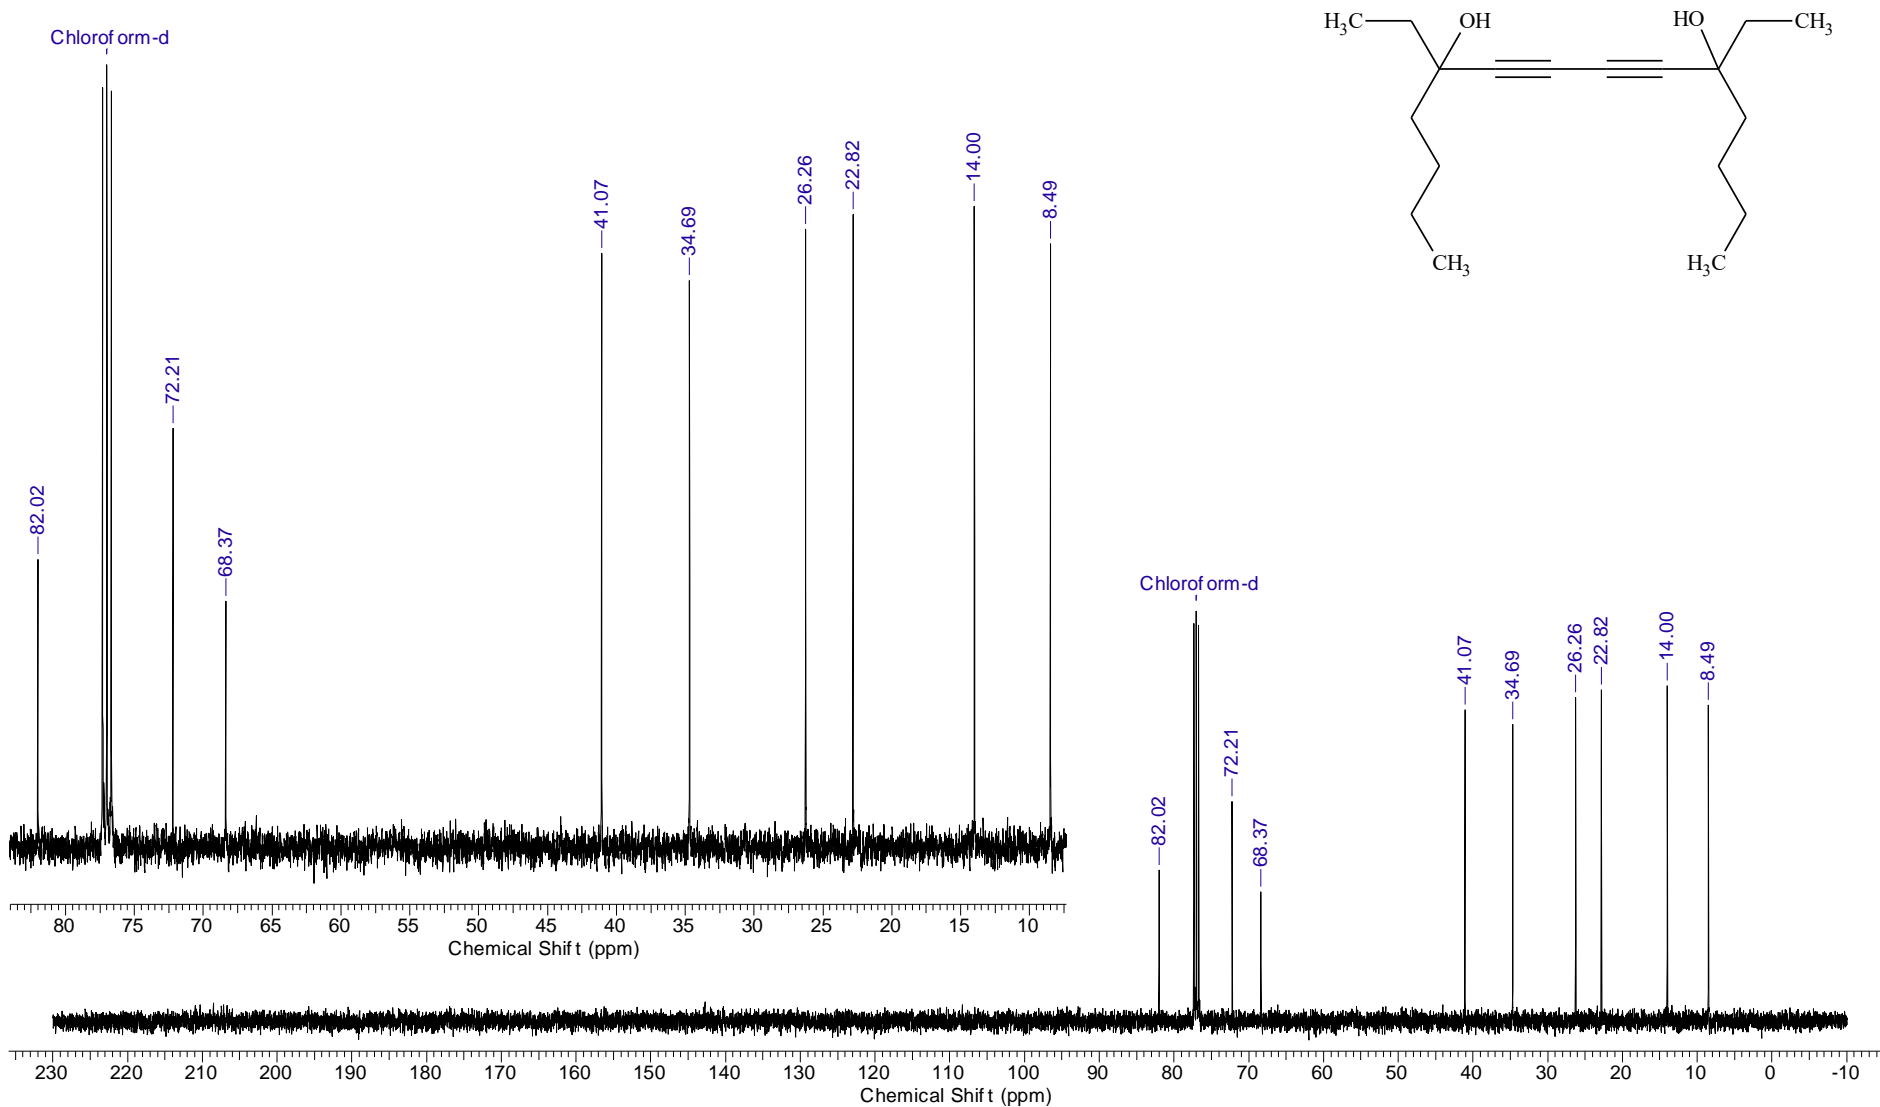

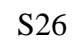

|                        |        |                      |                      |                       |                      |
|------------------------|--------|----------------------|----------------------|-----------------------|----------------------|
| Acquisition Time (sec) | 0.6783 | Comment              | Imported from UXNMR. | Date                  | 23 Dec 2021 11:47:22 |
| File Name              |        |                      |                      | Frequency (MHz)       | 100.61               |
| Nucleus                | 13C    | Number of Transients | 129                  | Original Points Count | 16384                |
| Pulse Sequence         | zgpg30 | Solvent              | CHLOROFORM-D         | Points Count          | 131072               |
| Temperature (degree C) | 27.000 |                      |                      | Sweep Width (Hz)      | 24154.59             |

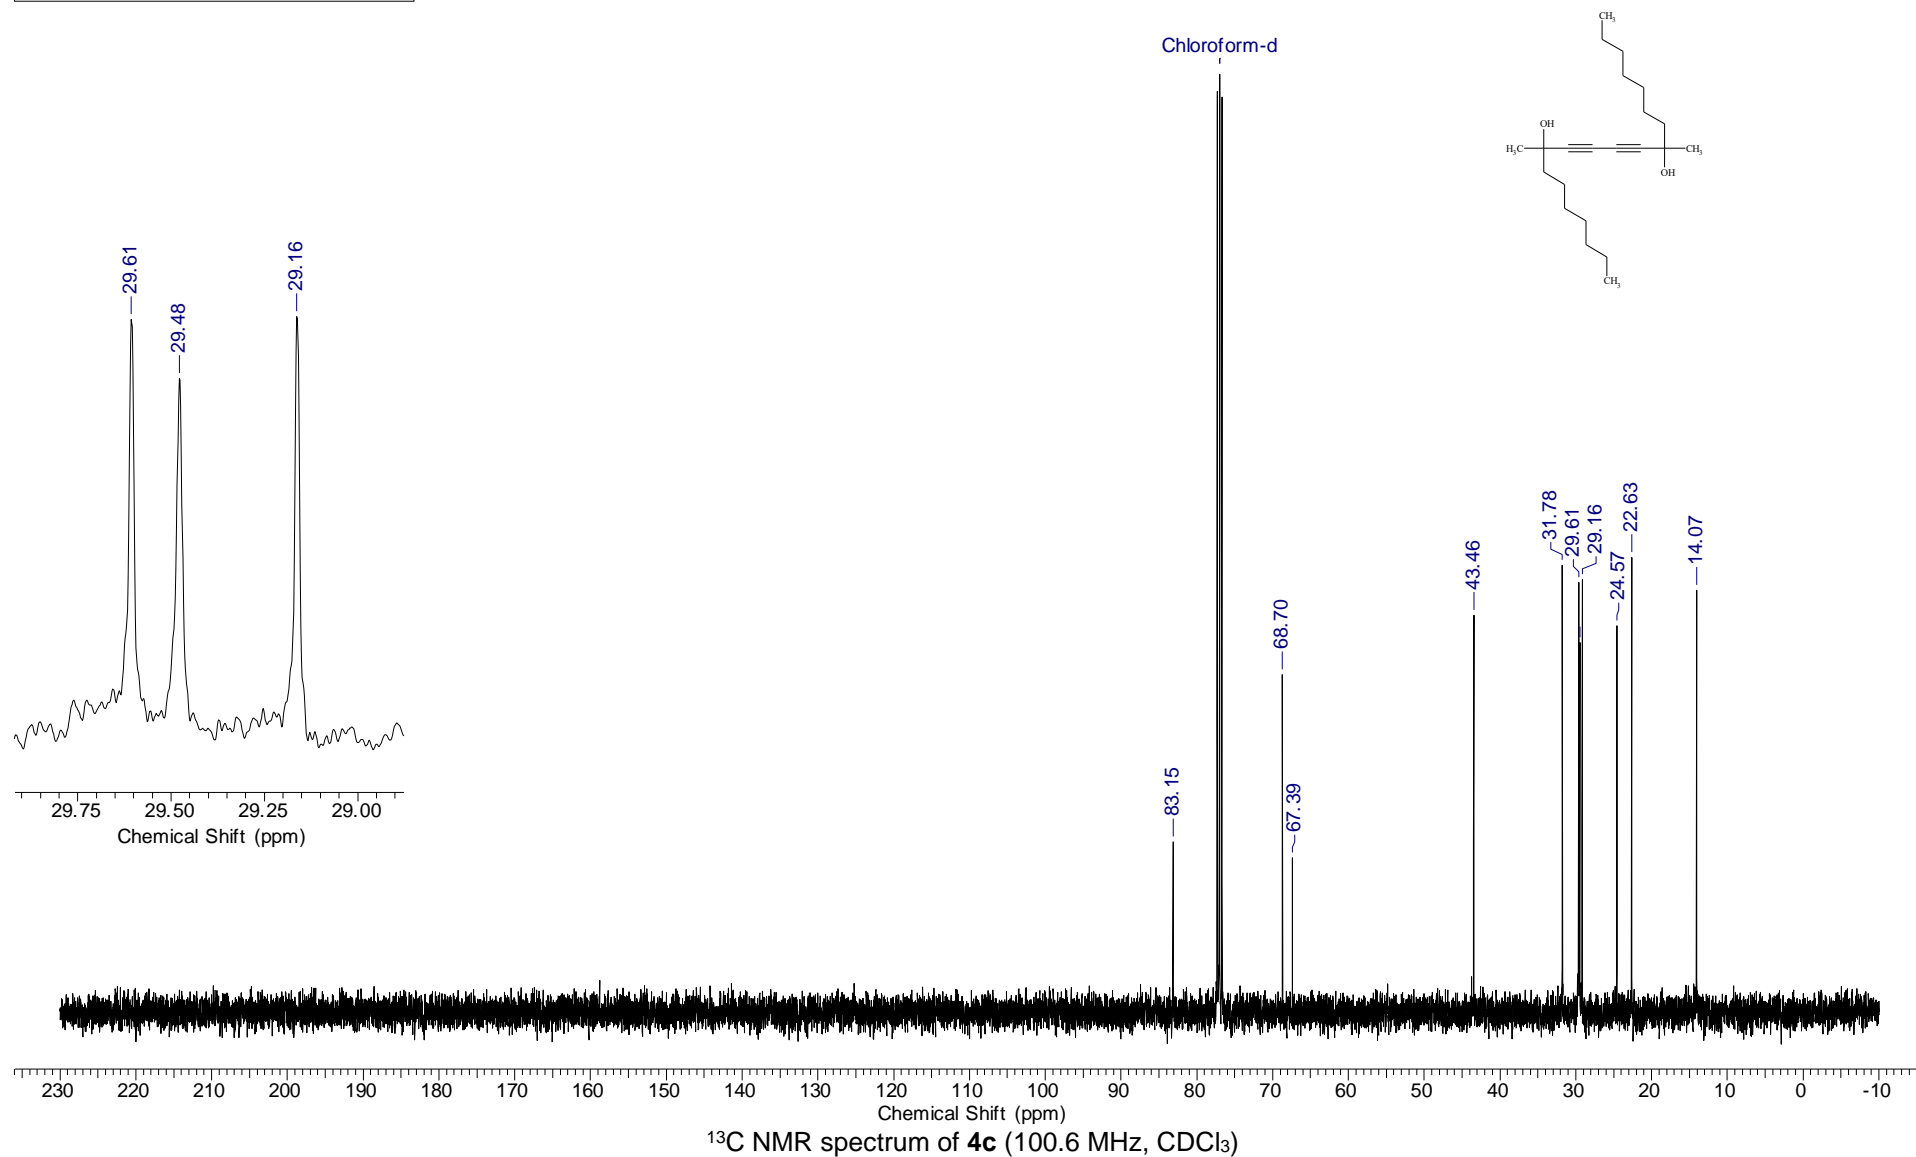

|                        |                                                       |                      |                      |                       |                  |                      |        |
|------------------------|-------------------------------------------------------|----------------------|----------------------|-----------------------|------------------|----------------------|--------|
| Acquisition Time (sec) | 4.0894                                                | Comment              | Imported from UXMNR. |                       | Date             | 22 Dec 2021 17:20:34 |        |
| File Name              | C:\DOCS\OUTPUT_301\2021\12.ääääöü\BM-2381-2.H_001001r |                      |                      |                       | Frequency (MHz)  | 400.13               |        |
| Nucleus                | 1H                                                    | Number of Transients | 4                    | Original Points Count | 32768            | Points Count         | 131072 |
| Pulse Sequence         | zg30                                                  | Solvent              | CHLOROFORM-D         |                       | Sweep Width (Hz) | 8012.82              |        |
| Temperature (degree C) | 27.000                                                |                      |                      |                       |                  |                      |        |

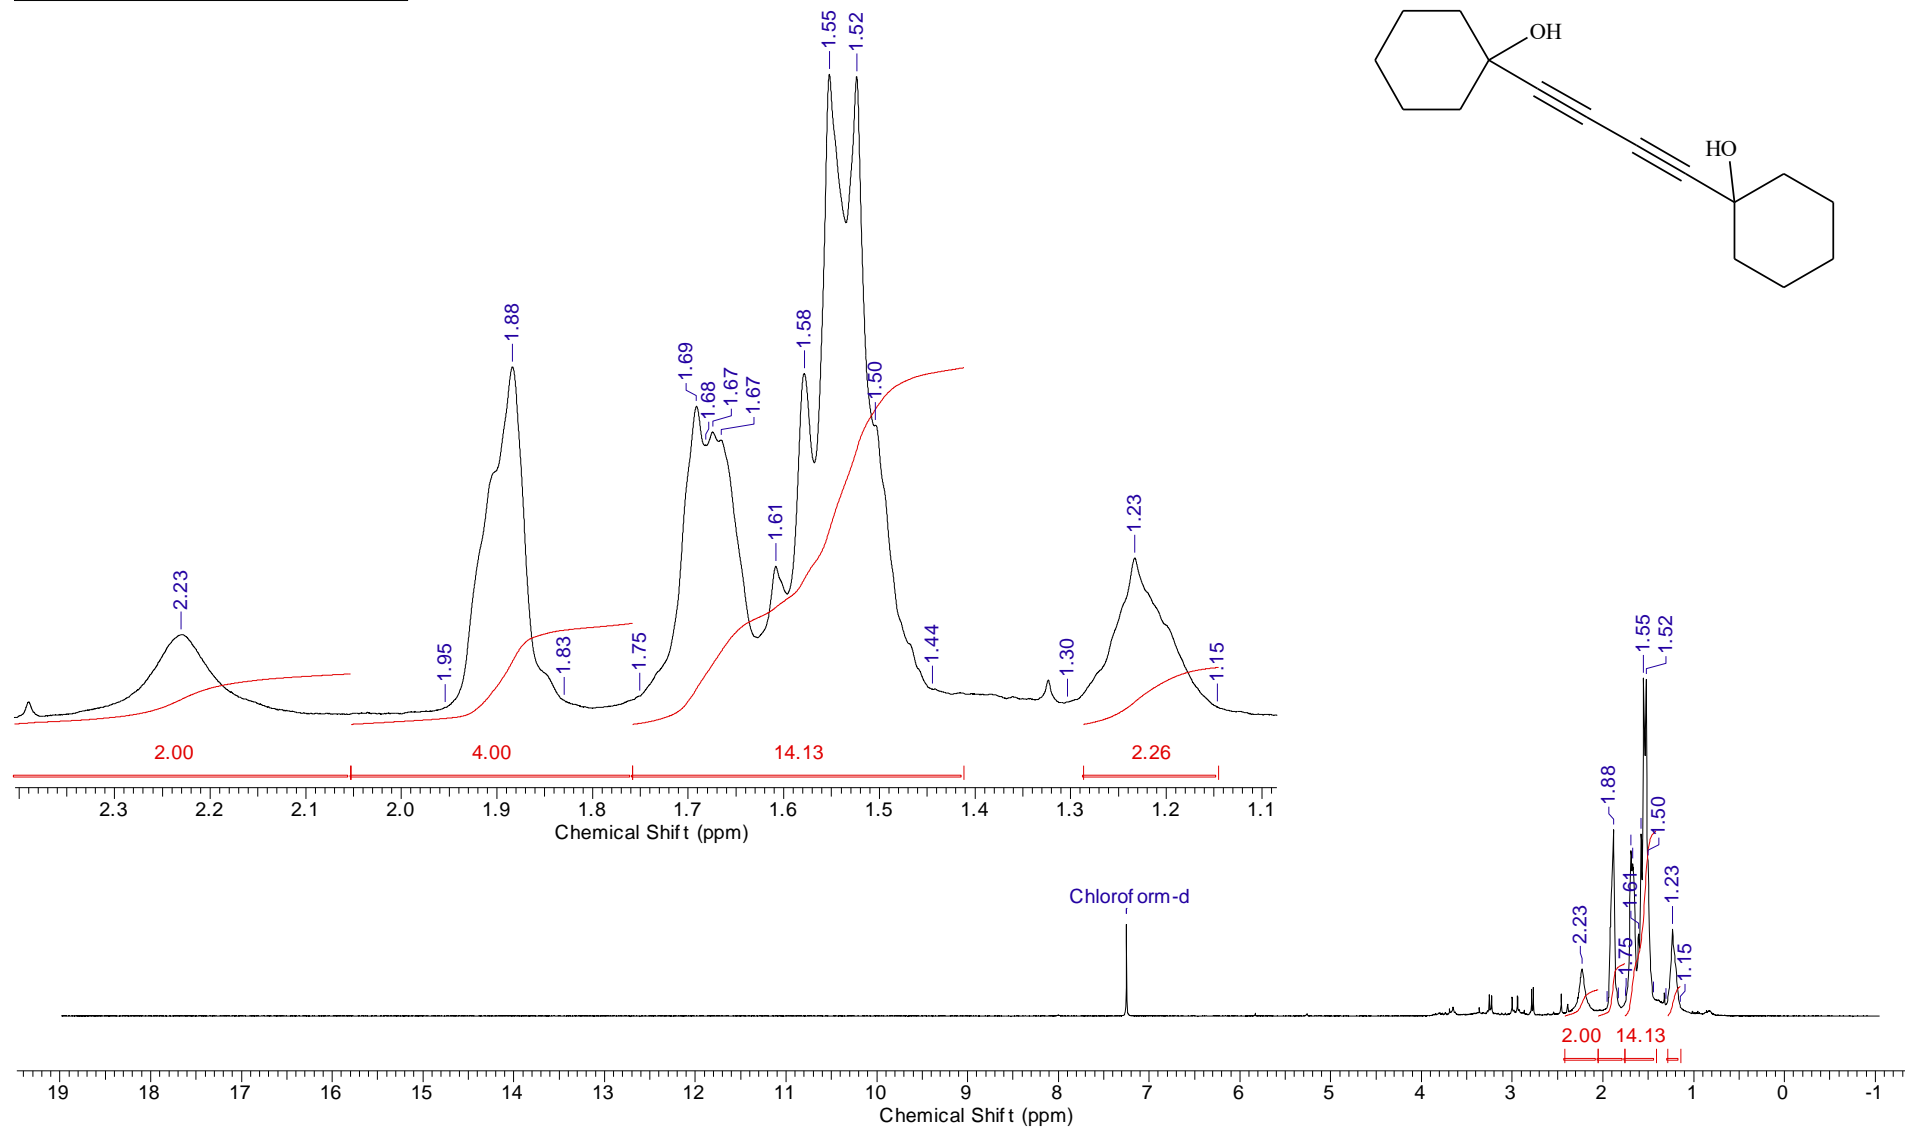<sup>1</sup>H NMR spectrum of **4d** (400.1 MHz, CDCl<sub>3</sub>)

|                        |                                                        |                      |              |                       |                      |                  |                 |                      |  |
|------------------------|--------------------------------------------------------|----------------------|--------------|-----------------------|----------------------|------------------|-----------------|----------------------|--|
| Acquisition Time (sec) | 0.6783                                                 | Comment              |              |                       | Imported from UXNMR. |                  | Date            | 23 Dec 2021 11:41:00 |  |
| File Name              | C:\DOCS\OUTPUT_301\2021\12.äääääöü\BM-2381-2.C_002001r |                      |              |                       |                      |                  | Frequency (MHz) | 100.61               |  |
| Nucleus                | 13C                                                    | Number of Transients | 299          | Original Points Count | 16384                |                  | Points Count    | 131072               |  |
| Pulse Sequence         | zgpg30                                                 | Solvent              | CHLOROFORM-D |                       |                      | Sweep Width (Hz) | 24154.59        |                      |  |
| Temperature (degree C) | 27.000                                                 |                      |              |                       |                      |                  |                 |                      |  |

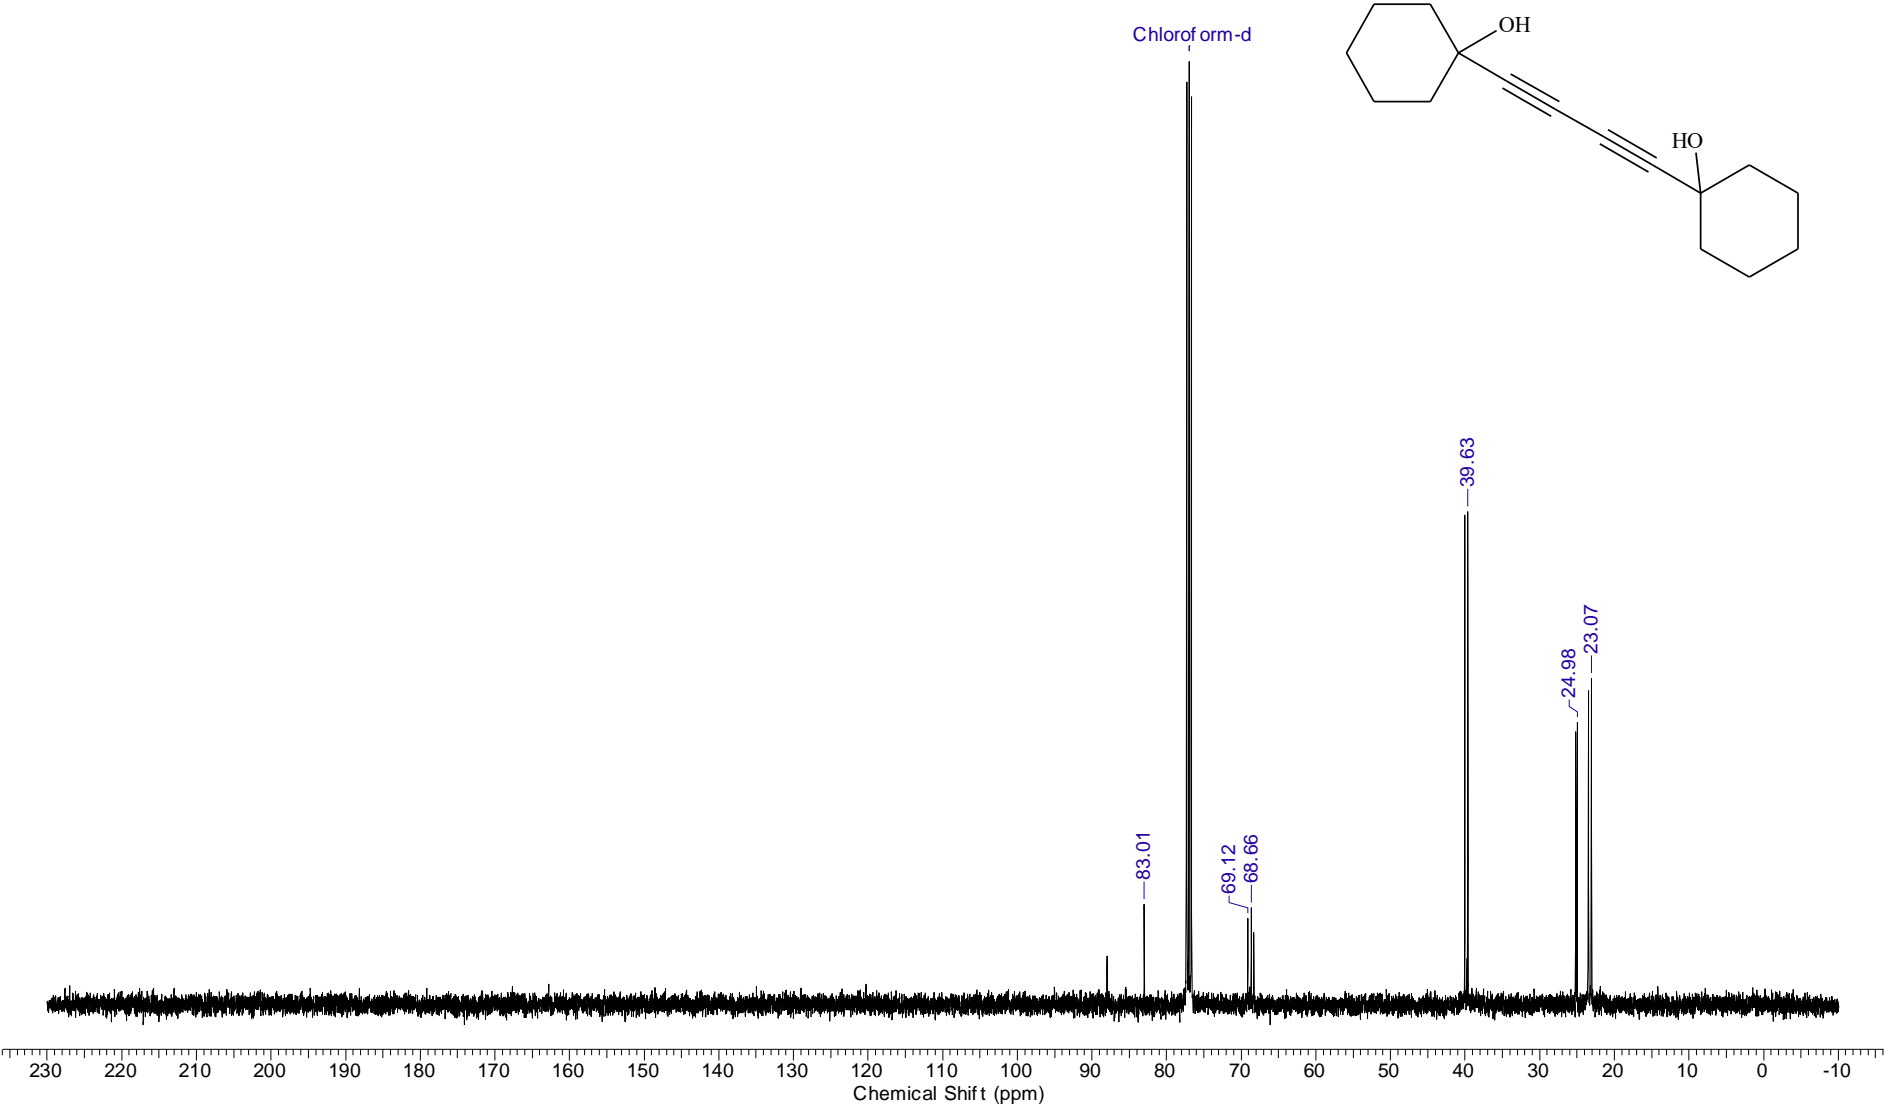

13C NMR spectrum of 4d (100.6 MHz, CDCl<sub>3</sub>)

|                        |                                                      |                      |                      |                       |                 |                        |        |
|------------------------|------------------------------------------------------|----------------------|----------------------|-----------------------|-----------------|------------------------|--------|
| Acquisition Time (sec) | 4.0894                                               | Comment              | Imported from UXNMR. |                       | Date            | 24 Dec 2021 15:47:04   |        |
| File Name              | C:\DOCS\OUTPUT_301\2021\12.aaaaa\BM-2382-2.H_001001r |                      |                      |                       | Frequency (MHz) | 400.13                 |        |
| Nucleus                | 1H                                                   | Number of Transients | 4                    | Original Points Count | 32768           | Points Count           | 131072 |
| Pulse Sequence         | zg30                                                 | Solvent              | Acetone              | Sweep Width (Hz)      | 8012.82         | Temperature (degree C) | 27.000 |

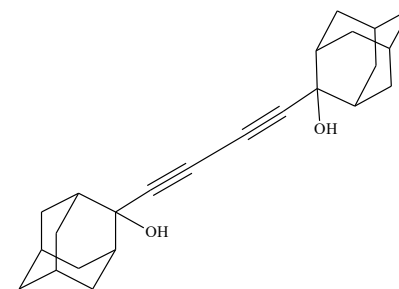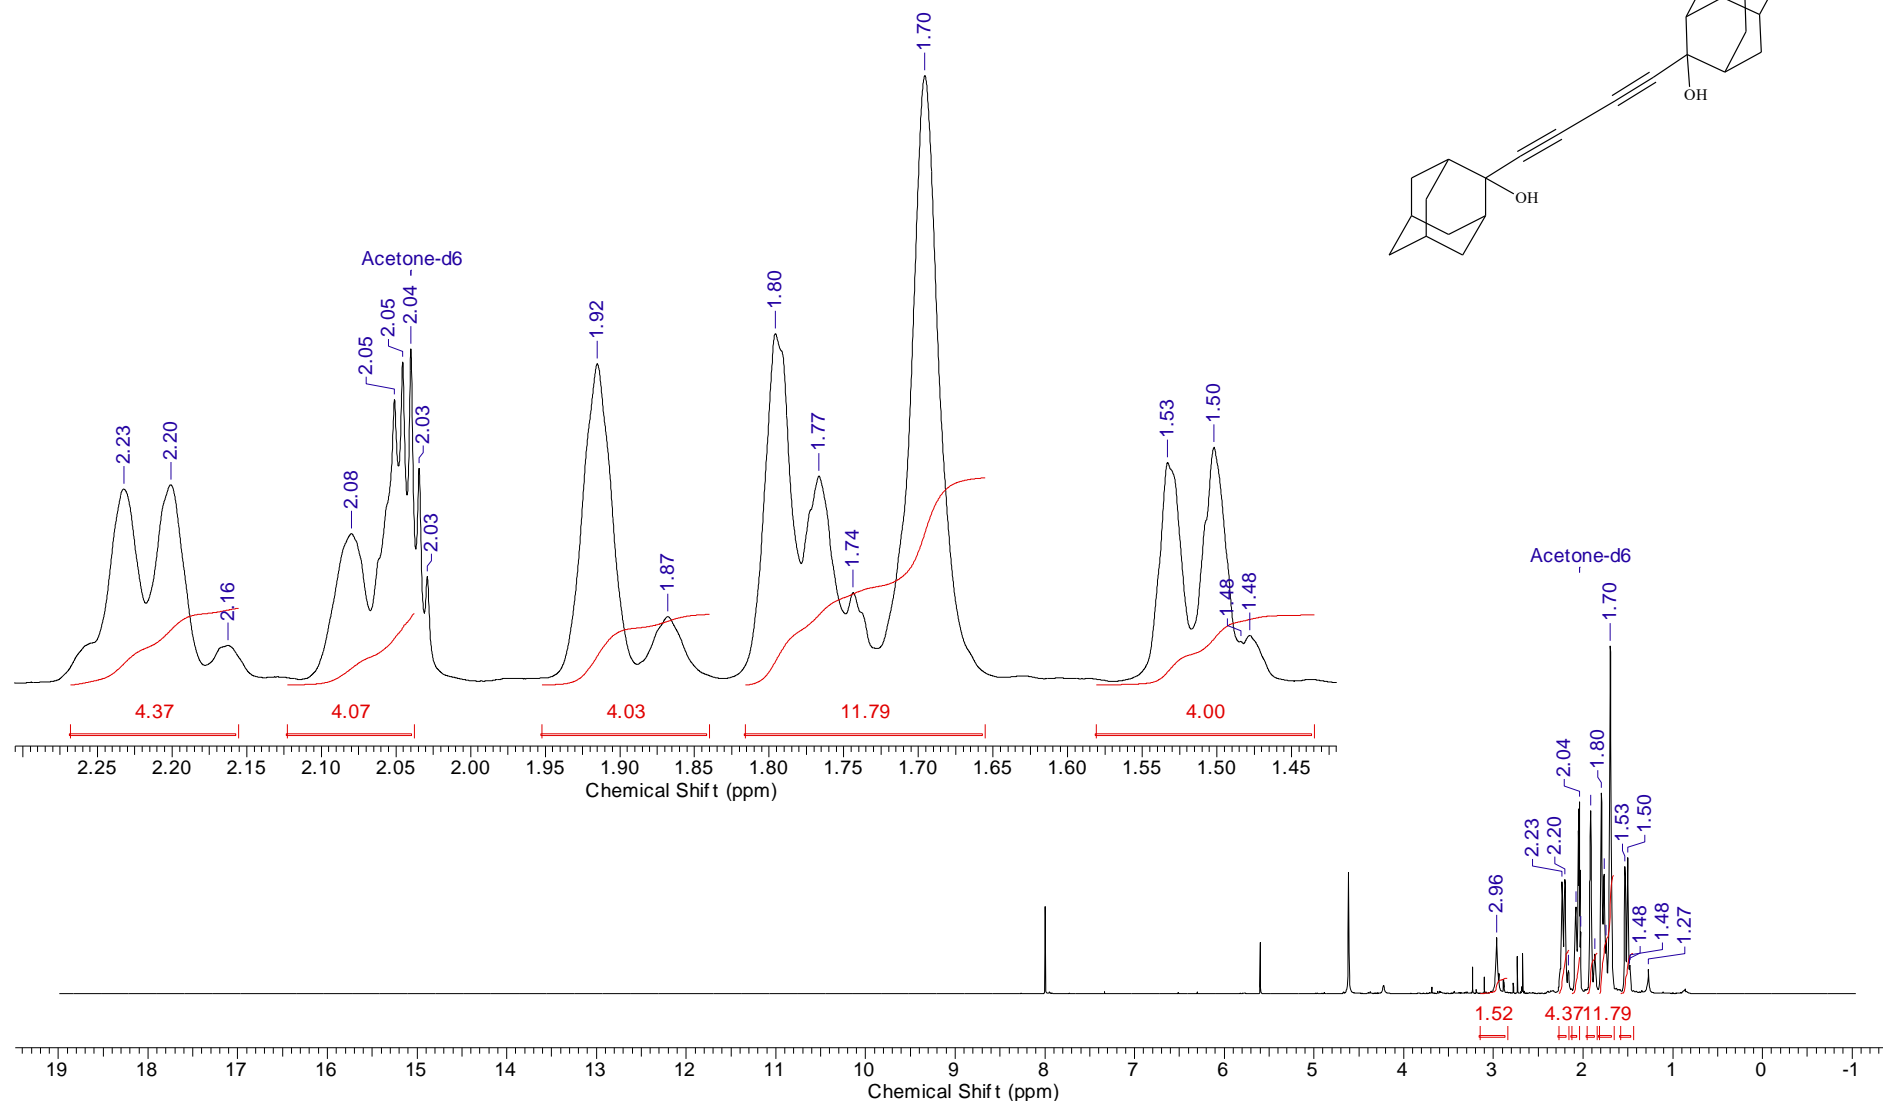

<sup>1</sup>H NMR spectrum of **4e** (400.1 MHz, CDCl<sub>3</sub>)

|                        |                                                      |                      |                      |                       |                      |
|------------------------|------------------------------------------------------|----------------------|----------------------|-----------------------|----------------------|
| Acquisition Time (sec) | 0.6783                                               | Comment              | Imported from UXNMR. | Date                  | 24 Dec 2021 15:50:56 |
| File Name              | C:\DOCS\OUTPUT_301\2021\12.aaaaa\BM-2382-2.C_002001r |                      |                      | Frequency (MHz)       | 100.61               |
| Nucleus                | <sup>13</sup> C                                      | Number of Transients | 65                   | Original Points Count | 16384                |
| Pulse Sequence         | zgpg30                                               | Solvent              | CHLOROFORM-D         | Points Count          | 131072               |
| Temperature (degree C) | 27.000                                               |                      |                      | Sweep Width (Hz)      | 24154.59             |

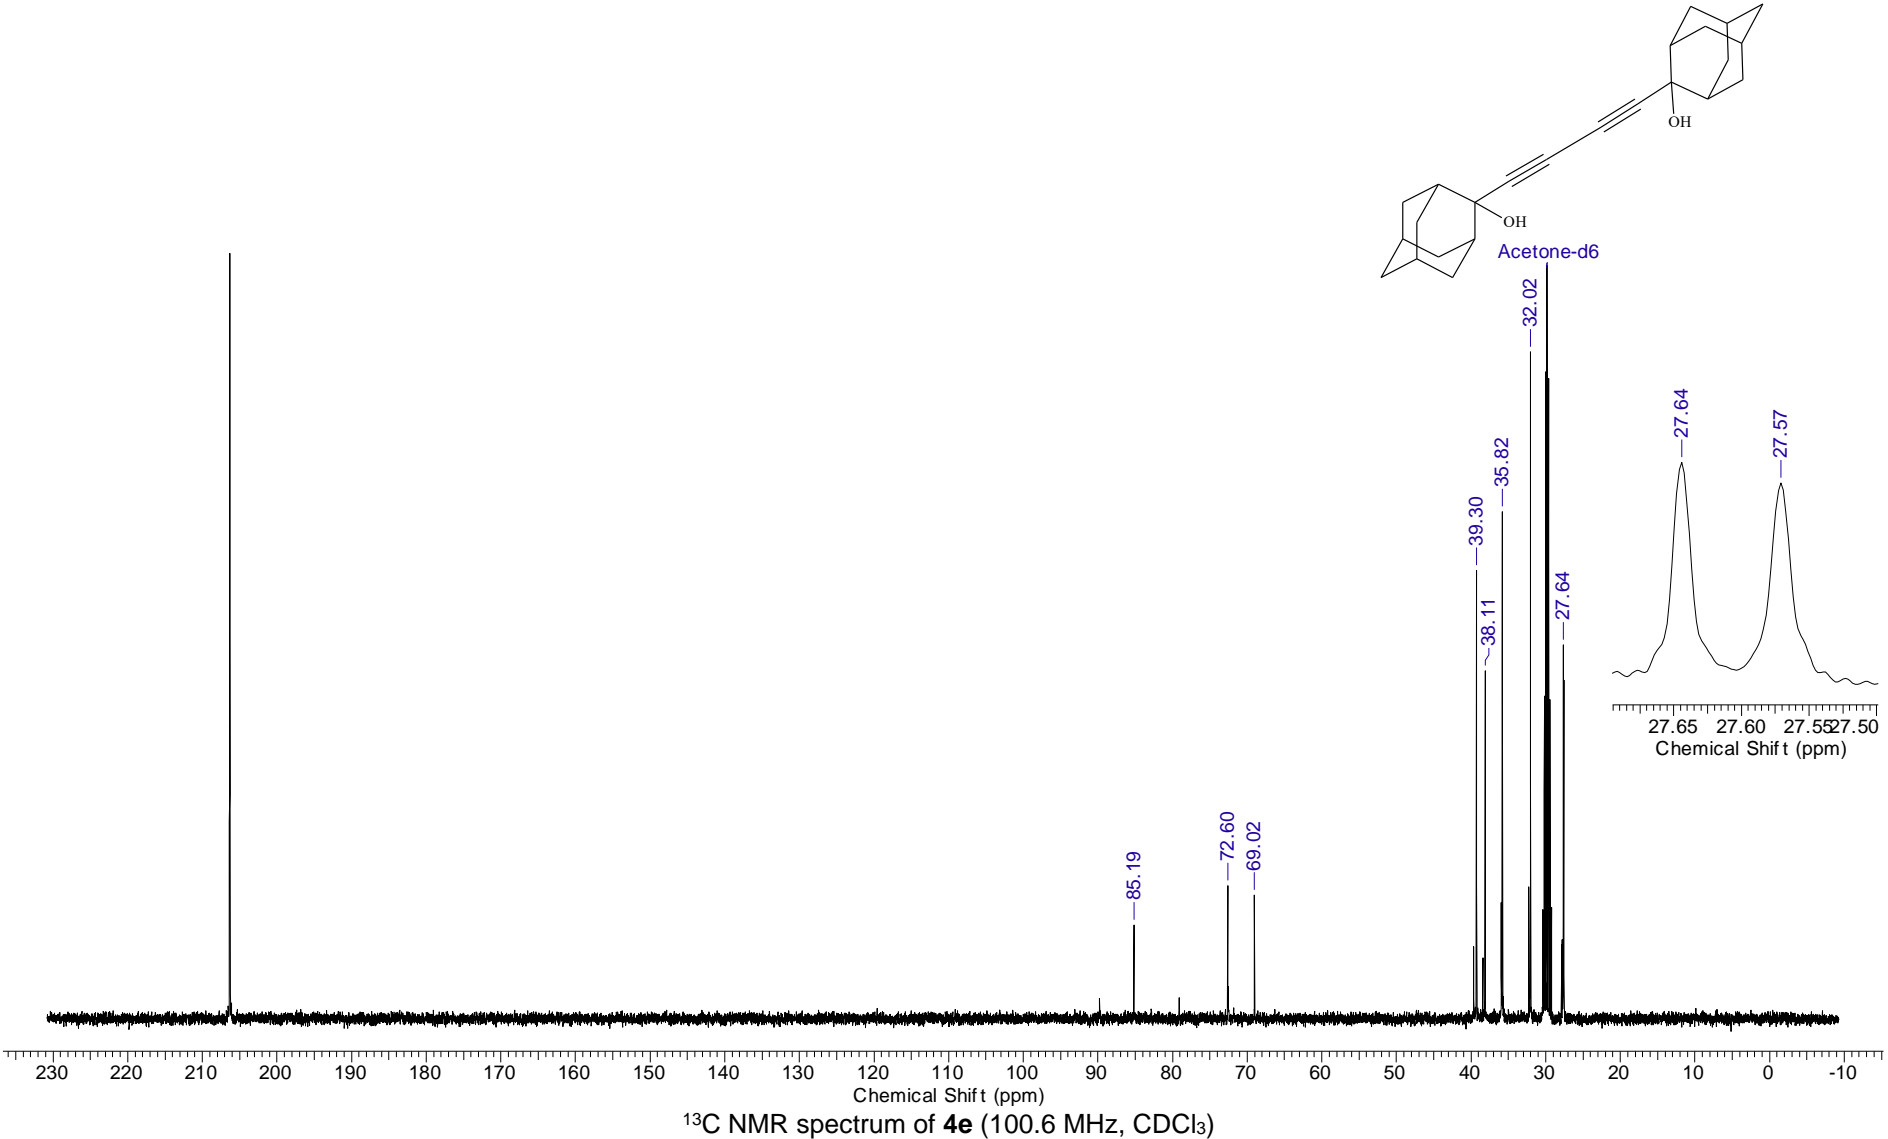

|                        |                                                        |                      |            |                       |                      |                        |                      |
|------------------------|--------------------------------------------------------|----------------------|------------|-----------------------|----------------------|------------------------|----------------------|
| Acquisition Time (sec) | 4.0894                                                 | Comment              |            |                       | Imported from UXNMR. | Date                   | 23 Dec 2021 12:37:34 |
| File Name              | C:\DOCS\OUTPUT_301\2021\12.äääääöü\BM-2392-2.H_001001r |                      |            |                       |                      | Frequency (MHz)        | 400.13               |
| Nucleus                | 1H                                                     | Number of Transients | 4          | Original Points Count | 32768                | Points Count           | 131072               |
| Pulse Sequence         | zg30                                                   | Solvent              | BENZENE-D6 | Sweep Width (Hz)      | 8012.82              | Temperature (degree C) | 27.000               |

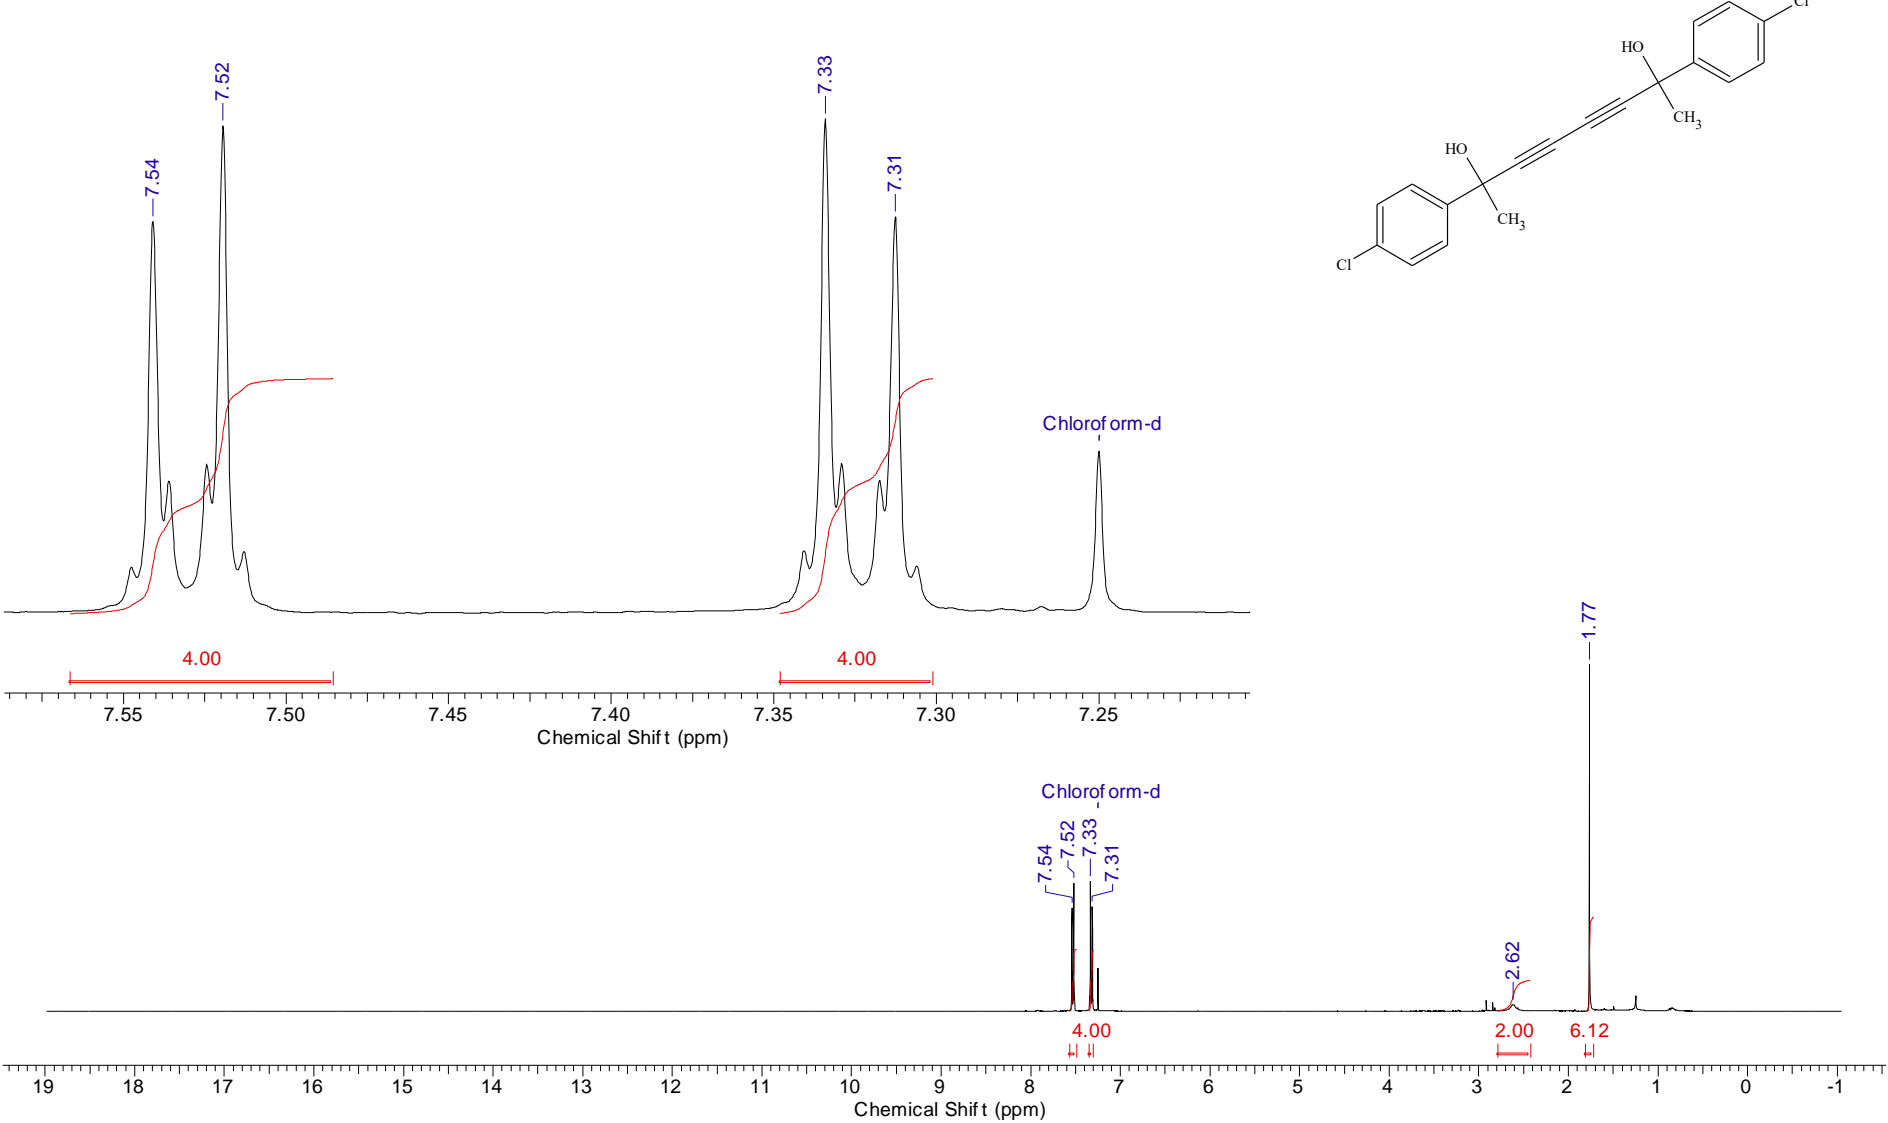

<sup>1</sup>H NMR spectrum of **4f** (400.1 MHz, CDCl<sub>3</sub>)



|                        |                |                                       |                      |                       |                      |
|------------------------|----------------|---------------------------------------|----------------------|-----------------------|----------------------|
| Acquisition Time (sec) | 0.6783         | Comment                               | Imported from UXNMR. | Date                  | 23 Dec 2021 12:48:50 |
| File Name              | C:\DOCS\OUTPUT | 301\2021\12.aaaaa\BM-2392-2.C_002001r |                      | Frequency (MHz)       | 100.61               |
| Nucleus                | 13C            | Number of Transients                  | 214                  | Original Points Count | 16384                |
| Pulse Sequence         | zgpg30         | Solvent                               | CHLOROFORM-D         | Points Count          | 131072               |
| Temperature (degree C) | 27.000         |                                       |                      | Sweep Width (Hz)      | 24154.59             |

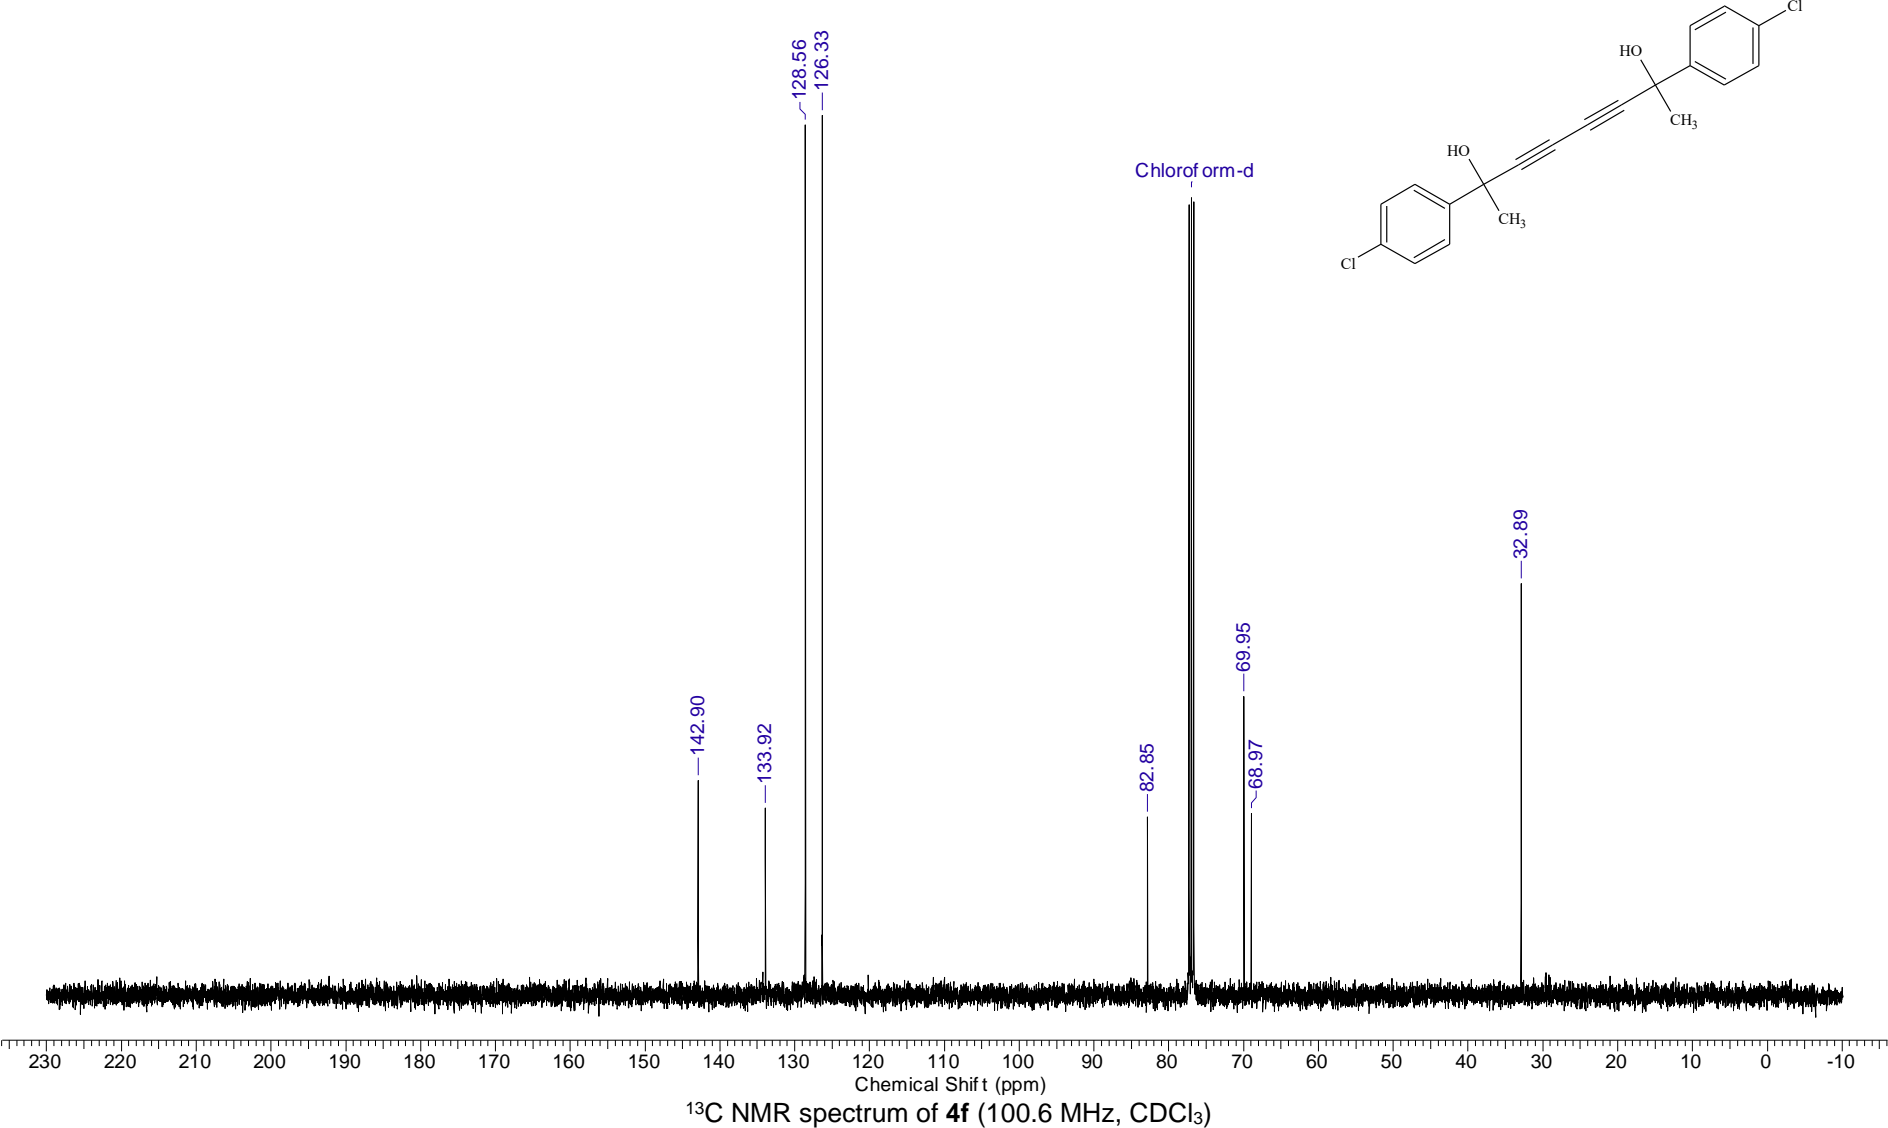

Supplement: s1 [file s1]
